# Supplementary material for: The evolution towards cyclic structures in the aggregation of aromatic alcohols: the dimer, trimer and tetramer of 2-phenylethanol
Source: Royal Society of Chemistry journal article supplement (doi:10.1039/d2cp03485a), 2022-01-01
Supplement: d2cp03485a1.pdf [file d2cp03485a1.pdf]

# The Evolution Towards Cyclic Structures in the Aggregation of Aromatic Alcohols: The Dimer, Trimer and Tetramer of 2-Phenylethanol†

## *ELECTRONIC SUPPLEMENTARY INFORMATION*

Ander Camiruaga,<sup>a‡</sup> Rizalina Tama Saragi,<sup>b‡</sup> Fernando Torres,<sup>a</sup> Marcos Juanes,<sup>b</sup> Imanol Usabiaga,<sup>a</sup> Alberto Lesarri<sup>b\*</sup> and José A. Fernández<sup>a\*</sup>

<sup>a</sup> Department of Physical Chemistry, Faculty of Science and Technology, University of the Basque Country (UPV/EHU), Bº Sarriena S/N, Leioa 48940, (Spain)

<sup>b</sup> Departamento de Química Física y Química Inorgánica and I.U. CINQUIMA, Facultad de Ciencias, Universidad de Valladolid, Paseo de Belén, 7, 47011 Valladolid (Spain)

†These authors contributed equally to this work.

\* Correspondence: [alberto.lesarri@uva.es](mailto:alberto.lesarri@uva.es); [josea.fernandez@ehu.es](mailto:josea.fernandez@ehu.es)

## TABLE OF CONTENTS

DFT calculations were implemented in gaussian16, including the geometry optimization and frequency calculations. The vibrational modes were obtained using the double-harmonic approximation. The B3LYP functional was supplemented with D3 empirical dispersion corrections and the Becke-Johnson damping function.

At the B3LYP-D3(BJ)/def2TZVP, a correction factor of 0.963 was used to account for the anharmonicity of wavenumber values of both CH and OH stretching modes. In order to reproduce the bandwidth observed in the experimental vibrational spectrum, first, each frequency was represented with a Lorentzian function with a FWHM of 5  $\text{cm}^{-1}$ . Then, the effect of the laser on the shape of the transition was also taken into account by the convolution of a Gaussian function (FWHM = 6  $\text{cm}^{-1}$ ). Finally, to simulate the band broadening of the stretching vibrations of polar groups due to hydrogen bond formation, the FWHM of the bands involved in the interactions was adjusted to 10  $\text{cm}^{-1}$  for those OH vibrational modes down to 3550  $\text{cm}^{-1}$ , of 15  $\text{cm}^{-1}$  for those modes between 3400-3550  $\text{cm}^{-1}$  and of 40  $\text{cm}^{-1}$  for those bellow 3400  $\text{cm}^{-1}$ . Complexation energies were corrected for the BSSE, using the counterpoise approximation.

### Gaussian16 keywords for the B3LYP-D3(BJ)/def2TZVP calculation

```
# B3LYP EmpiricalDispersion=GD3BJ def2TZVP Integral(Grid=UltraFineGrid) opt=tight
freq density=current output=pickett prop=EFG
# B3LYP EmpiricalDispersion=GD3BJ def2TZVP counterpoise=2 density=current
output=pickett prop=EFG
```

## 1. Supplementary Figures

**Figure S1.** A) Comparison between the 2c-REMPI spectrum of PhEtOH and the UV/UV hole burning traces obtained probing the bands at 37627  $\text{cm}^{-1}$  (Isomer Gg $\pi$ ) and 37675  $\text{cm}^{-1}$  (Isomer At); B) comparison between the IR/UV spectra obtained probing the same UV transitions as in the hole burning and the simulations obtained using normal mode analysis (red traces) and anharmonic calculations (blue trace). A correction factor of 0.963 was used for the harmonic simulation.

**Figure S2.** Microwave spectrum of PhEthOH in the region 2-8 GHz. The positive trace (blue) is the original spectrum, including the monomer, isotopic satellites, possible clusters and impurities. The negative (red) trace spectrum corresponds to the subtraction of the monomer's transitions.

**Figure S3.** a) 2c-REMPI spectrum of PhEtOH dimer, along with the UV/UV hole burning spectra obtained tuning the “burning” laser at b) 37460  $\text{cm}^{-1}$  (red asterisk), c) 37493  $\text{cm}^{-1}$  (blue asterisk) and d) 37474  $\text{cm}^{-1}$  (green asterisk). Ionization wavelength was set to 35714  $\text{cm}^{-1}$ . e) IR/UV spectra of PhEtOH dimer. Roman numbers mark the transitions probed to obtain each IR spectrum.

**Figure S4.** IR/UV hole burning spectra obtained for PhEtOH dimer.

**Figure S5.** Comparison between the experimental IR/UV spectra of the three isomers of PhEtOH dimer and the simulations using the computations at B3LYP-D3(BJ)/def2TZVP level (red), B2PLYP-D3(BJ)/def2TZVP (blue) and MP2/def2TZVP (green trace). Visual inspection shows that the predictions at B3LYP-D3(BJ)/def2TZVP level better reproduce the experimental results and therefore, this is the computation level used for the assignment of the rest of the IR/UV spectra.

**Figure S6.** Computed higher-energy structures of the PhEtOH dimer at B3LYP-D3(BJ)/def2TZVP level. Energies inside brackets are given in kJ/mol.

**Figure S7.** Some selected additional structures of the PhEtOH trimer as computed at B3LYP-D3(BJ)/def2TZVP level. Energies inside brackets are given in kJ/mol.

**Figure S8.** Some selected additional structures of the PhEtOH tetramer as computed at B3LYP-D3(BJ)/def2TZVP level. Energies inside brackets are given in kJ/mol.

### 3. Supplementary Tables

**Table S1.** Prediction of the rotational and energetic parameters for 2-phenylethanol dimer using the B3LYP-D3(BJ) method and a polarized triple- $\zeta$  basis set (def2-TZVP).

**Table S2.** Comparison of the experimental parameters of 2-phenylethanol dimer with the predictions using the B3LYP-D3(BJ) method and a polarized triple- $\zeta$  basis set (def2-TZVP), together with the main structural parameters of the hydrogen bond.

**Table S3.** Prediction of the rotational and energetic parameters for 2-phenylethanol dimer using the B2PLYP-D3(BJ) method and a polarized triple- $\zeta$  basis set (def2-TZVP).

**Table S4.** Prediction of the rotational and energetic parameters for 2-phenylethanol dimer using the MP2 method and a polarized triple- $\zeta$  basis set (def2-TZVP).

**Table S5.** Observed rotational transitions of isomer 1 ( $Gg\pi+Gg\pi-Lp-$ ) of 2-phenylethanol dimer (Freq.), together with the differences with the calculated transitions (o.-c.) for the fit of Table 1 and estimated frequency uncertainties (unc.). All values in MHz.

**Table S6.** Observed rotational transitions of isomer 2 ( $Gg\pi+Gg\pi-Lp+$ ) of 2-phenylethanol dimer (Freq.), together with the differences with the calculated transitions (o.-c.) for the fit of Table 1 and estimated frequency uncertainties (unc.). All values in MHz.

**Table S7.** Observed rotational transitions of isomer 3 ( $Gg\pi-Gg\pi-Lp-$ ) of 2-phenylethanol dimer (Freq.), together with the differences with the calculated transitions (o.-c.) for the fit of Table 1 and estimated frequency uncertainties (unc.). All values in MHz.

**Table S8.** Equilibrium coordinates for isomer  $Gg\pi+Gg\pi-Lp-$  of 2-phenylethanol dimer, according to the prediction with B3LYP-D3(BJ) /def2TZVP.

**Table S9.** Equilibrium coordinates for isomer  $Gg\pi+Gg\pi-Lp+$  of 2-phenylethanol dimer, according to the prediction with B3LYP-D3(BJ) /def2TZVP.

**Table S10.** Equilibrium coordinates for isomer  $Gg\pi-Gg\pi-Lp-$  of 2-phenylethanol dimer, according to the prediction with B3LYP-D3(BJ) /def2TZVP.

**Table S11.** Equilibrium coordinates for isomer I ( $Gg\pi- Gg\pi+ Gg\pi+ Lp-$ ) of 2-phenylethanol trimer, according to the prediction with B3LYP-D3(BJ) /def2TZVP.

**Table S12.** Equilibrium coordinates for isomer II (E  $Gg\pi+ Gg\pi- Lp-$ ) of 2-phenylethanol trimer, according to the prediction with B3LYP-D3(BJ) /def2TZVP.

**Table S13.** Equilibrium coordinates for isomer I ( $Gg+ At Gg- Gg\pi+$ ) of 2-phenylethanol tetramer, according to the prediction with B3LYP-D3(BJ) /def2TZVP.

**Table S14.** Equilibrium coordinates for isomer II ( $Gg\pi+ Gg+ Gg\pi+ Gt$ ) of 2-phenylethanol tetramer, according to the prediction with B3LYP-D3(BJ) /def2TZVP.

**Table S15.** Equilibrium coordinates for isomer III ( $Gt Gg+ Gt Gg-$ ) of 2-phenylethanol tetramer, according to the prediction with B3LYP-D3(BJ) /def2TZVP.

**Table S16.** Equilibrium coordinates for isomer IV ( $Gg- Gg- Gg\pi+ Gg\pi-$ ) of 2-phenylethanol tetramer, according to the prediction with B3LYP-D3(BJ) /def2TZVP.

**Figure S1.** A) Comparison between the 2c-REMPI spectrum of PhEtOH and the UV/UV hole burning traces obtained probing the bands at 37627  $\text{cm}^{-1}$  (Isomer Gg $\pi$ ) and 37675  $\text{cm}^{-1}$  (Isomer At); B) comparison between the IR/UV spectra obtained probing the same UV transitions as in the hole burning and the simulations obtained using normal mode analysis (red traces) and anharmonic calculations (blue trace). A correction factor of 0.963 was used for the harmonic simulation.

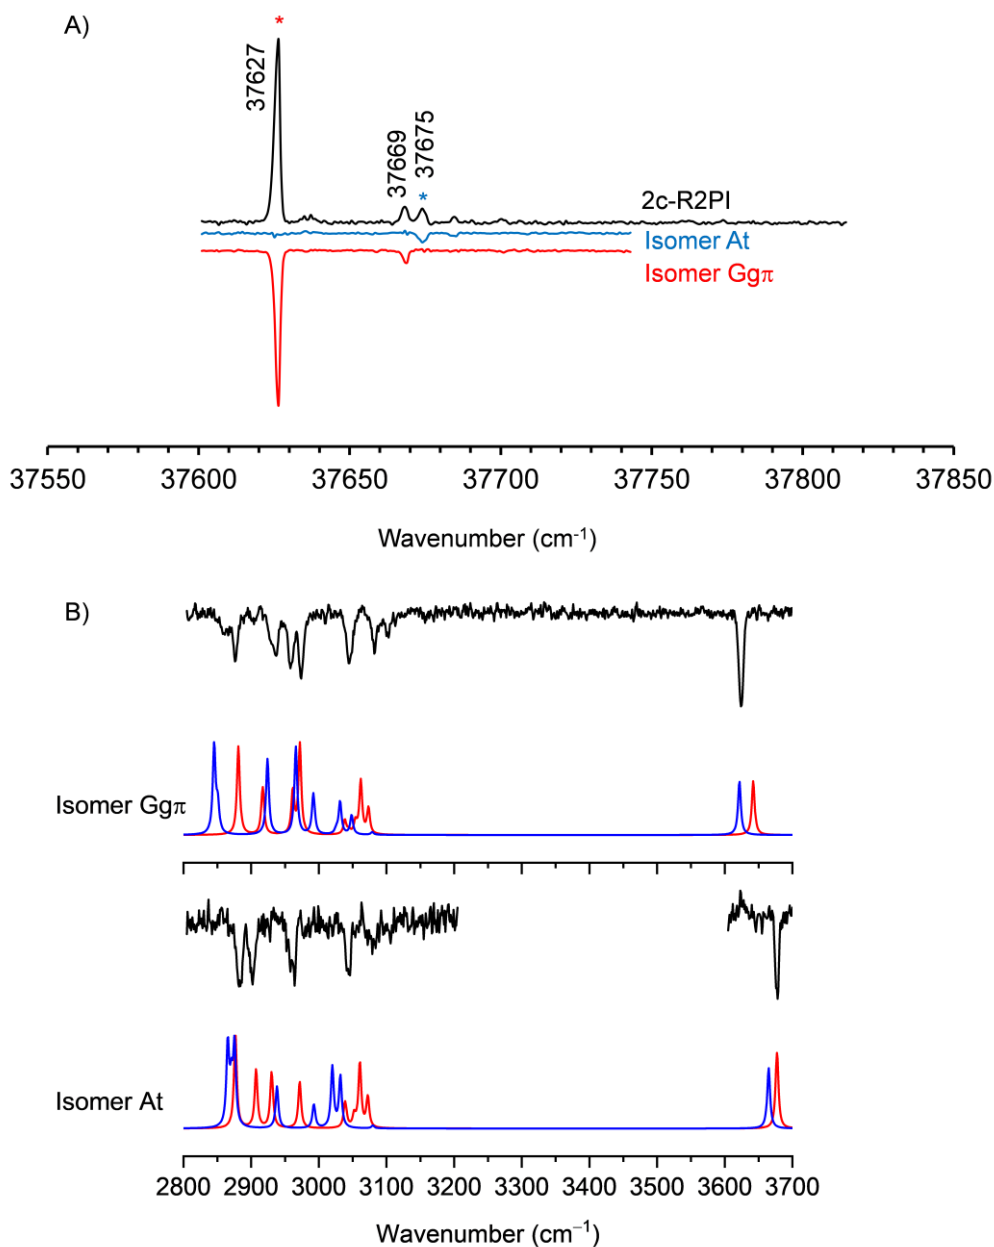

**Figure S2.** Microwave spectrum of PhEthOH in the region 2-8 GHz. The positive trace (blue) is the original spectrum, including the monomer, isotopic satellites, possible clusters and impurities. The negative (red) trace spectrum corresponds to the subtraction of the monomer's transitions.

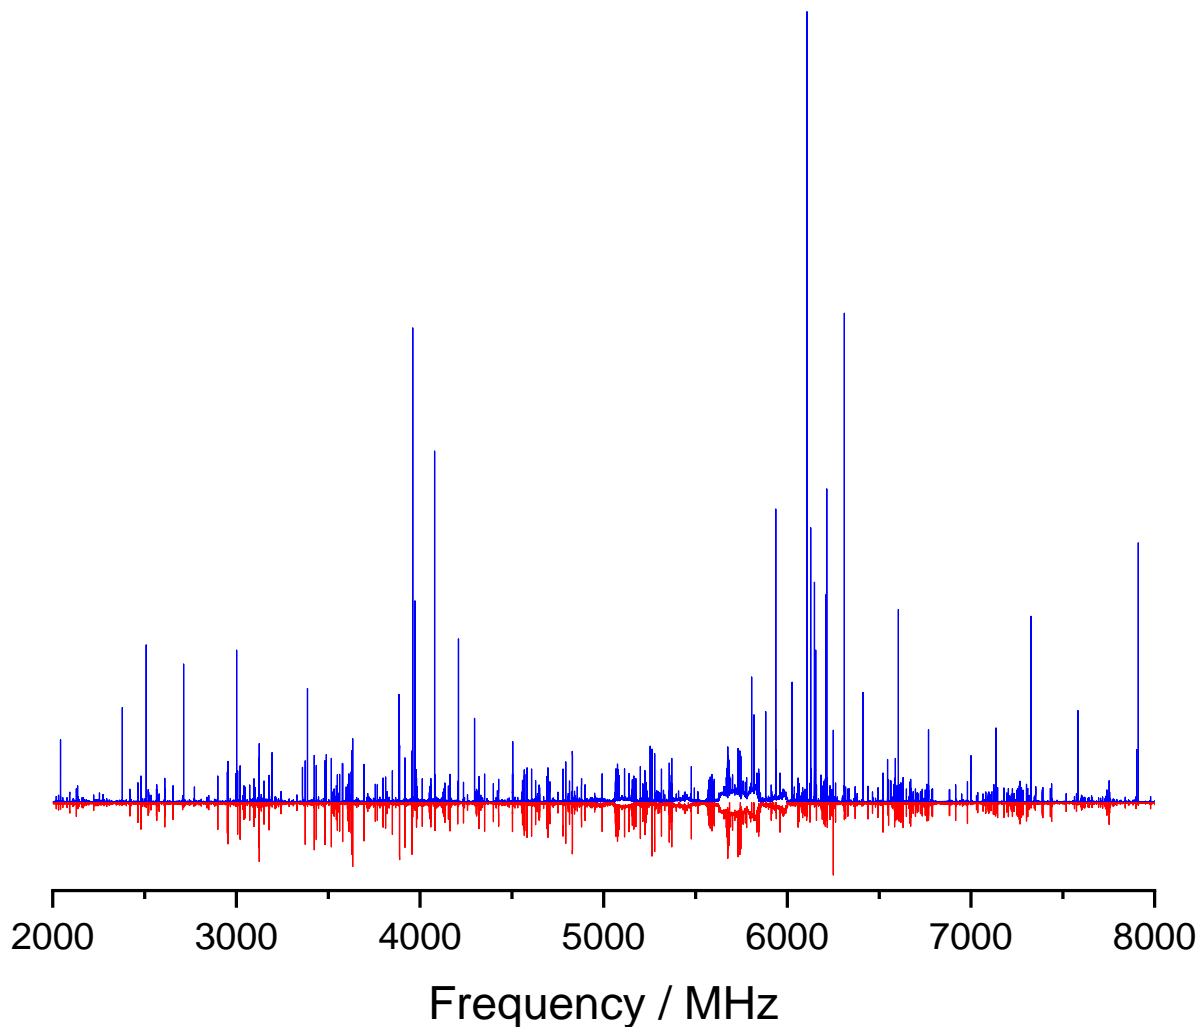

**Figure S3.** a) 2c-REMPI spectrum of PhEtOH dimer, along with the UV/UV hole burning spectra obtained tuning the “burning” laser at b) 37460  $\text{cm}^{-1}$  (red asterisk), c) 37493  $\text{cm}^{-1}$  (blue asterisk) and d) 37474  $\text{cm}^{-1}$  (green asterisk). Ionization wavelength was set to 35714  $\text{cm}^{-1}$ . e) IR/UV spectra of PhEtOH dimer. Roman numerals mark the transitions probed to obtain each IR spectrum.

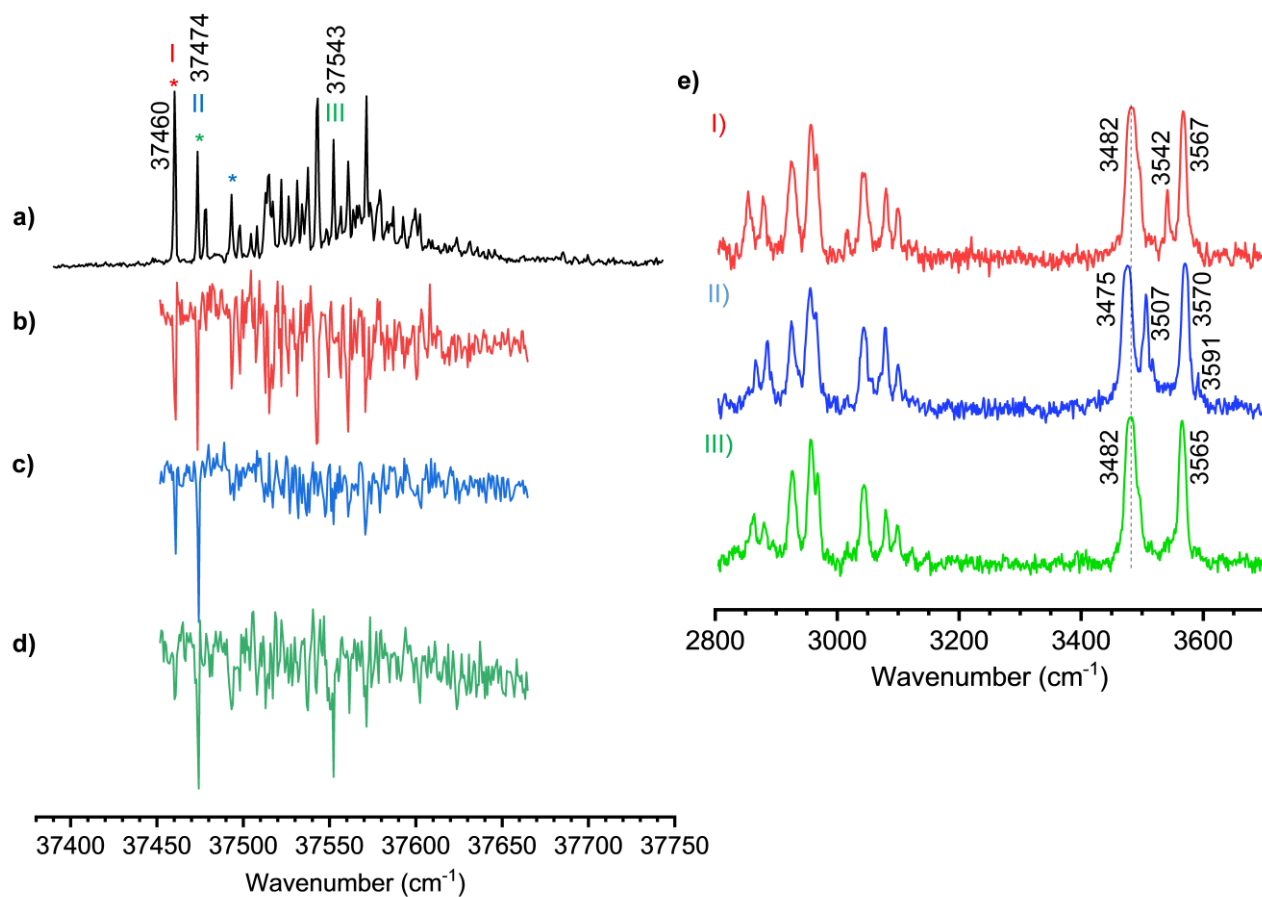

**Figure S4.** IR/UV hole burning spectra obtained for PhEtOH dimer.

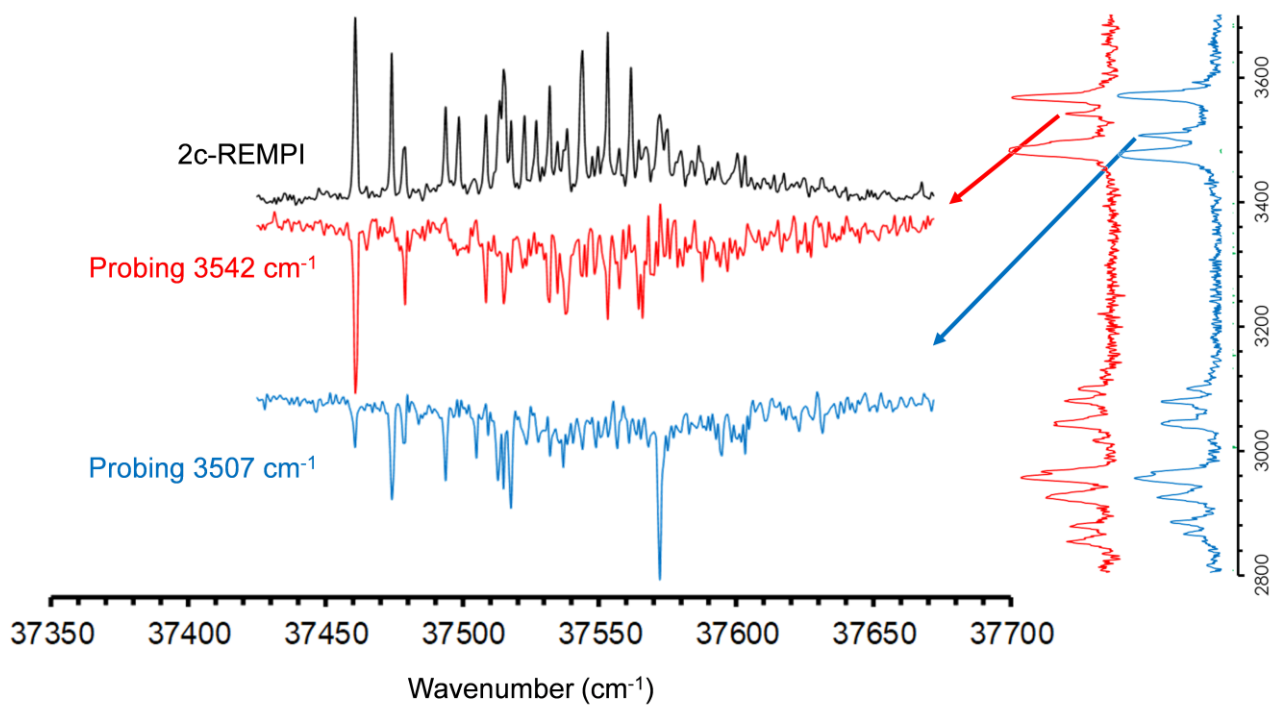



**Figure S5.** Comparison between the experimental IR/UV spectra of the three isomers of PhEtOH dimer and the simulations using the computations at B3LYP-D3(BJ)/def2TZVP level (red), B2PLYP-D3(BJ)/def2TZVP (blue) and MP2/def2TZVP (green trace). Visual inspection shows that the predictions at B3LYP-D3(BJ)/def2TZVP level better reproduce the experimental results and therefore, this is the computation level used for the assignment of the rest of the IR/UV spectra.

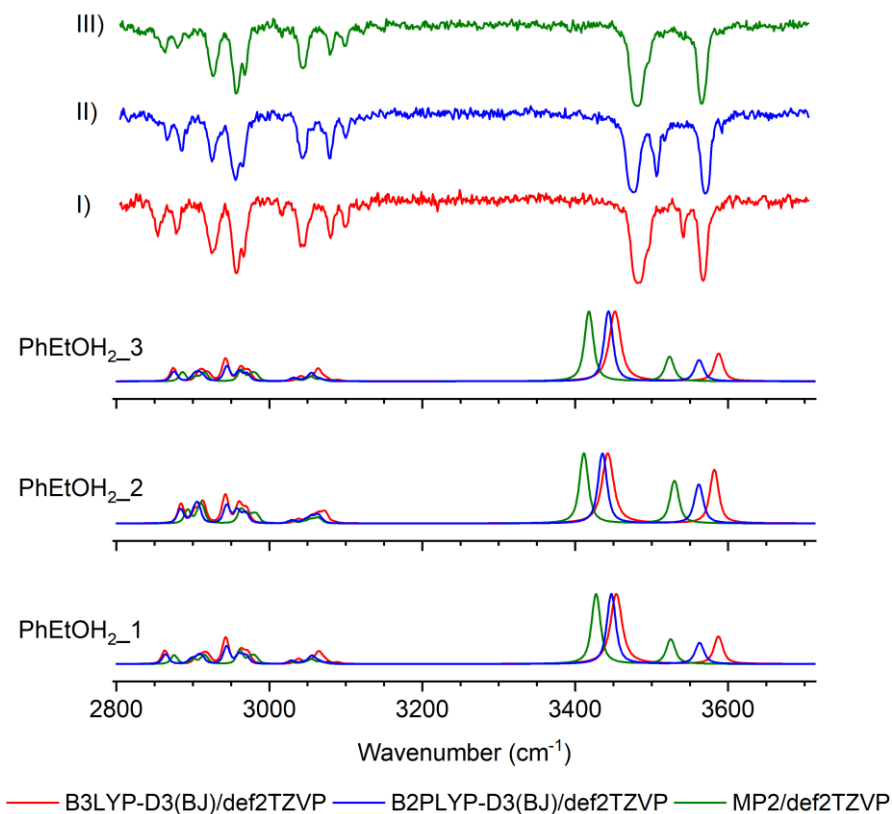

**Figure S6.** Computed higher-energy structures of the PhEtOH dimer at B3LYP-D3(BJ)/def2TZVP level. Energies inside brackets are given in kJ/mol.

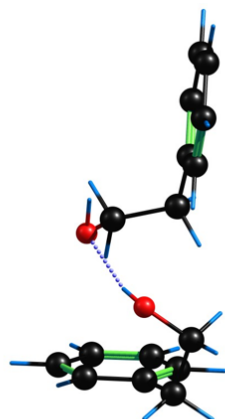

PhEtOH<sub>2</sub>\_09  
(Ggπ- Ggπ+ Lp+)  
[10.6]<sub>0K</sub> [9.1]<sub>298K</sub>

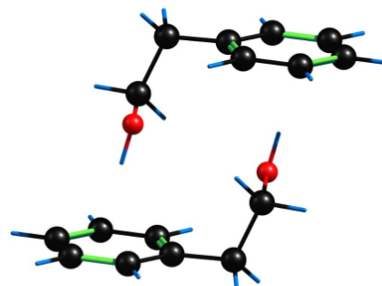

PhEtOH<sub>2</sub>\_10  
(Gt Gt)  
[11.5]<sub>0K</sub> [5.2]<sub>298K</sub>

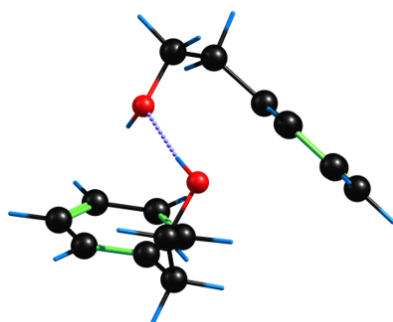

PhEtOH<sub>2</sub>\_07  
(Ggπ+ Gπ- Lp-)  
[8.7]<sub>0K</sub> [9.3]<sub>298K</sub>

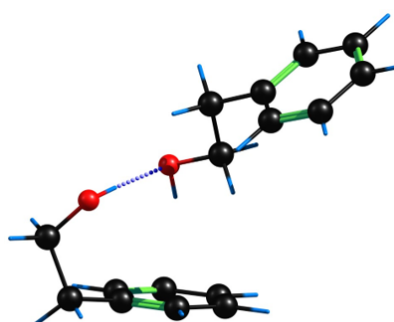

PhEtOH<sub>2</sub>\_08  
(Ggπ+ At Lp-)  
[10.1]<sub>0K</sub> [5.6]<sub>298K</sub>

**Figure S7.** Some selected additional structures of the PhEtOH trimer as computed at B3LYP-D3(BJ)/def2TZVP level. Energies inside brackets are given in kJ/mol.

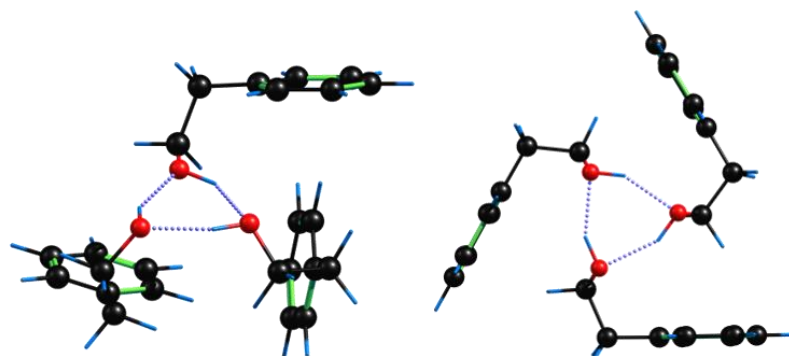

PhEtOH<sub>3</sub>\_09  
(E Ggπ+ Ggπ-)  
[7.9]<sub>0K</sub> [4.6]<sub>298K</sub>

PhEtOH<sub>3</sub>\_10  
(Gg+ Gg+ Gg+)  
[12.7]<sub>0K</sub> [11.0]<sub>298K</sub>

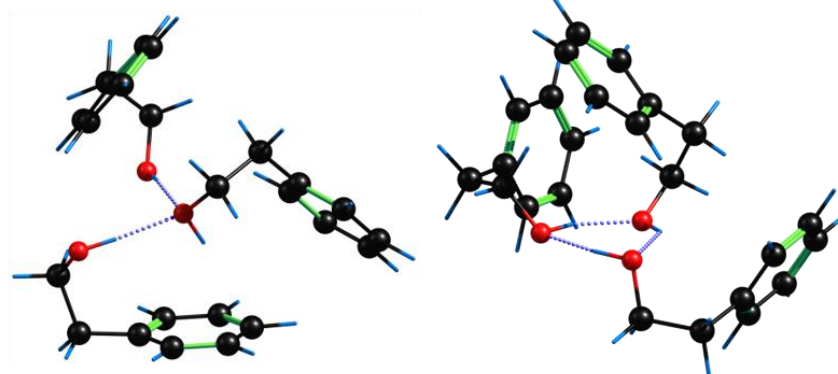

PhEtOH<sub>3</sub>\_07  
(Ggπ+ Lp+ Ggπ- Lp- Ggπ+)  
[5.6]<sub>0K</sub> [4.3]<sub>298K</sub>

PhEtOH<sub>3</sub>\_08  
(Gt Gt Ggπ+)  
[6.5]<sub>0K</sub> [3.4]<sub>298K</sub>

**Figure S8.** Some selected additional structures of the PhEtOH tetramer as computed at B3LYP-D3(BJ)/def2TZVP level. Energies inside brackets are given in kJ/mol.

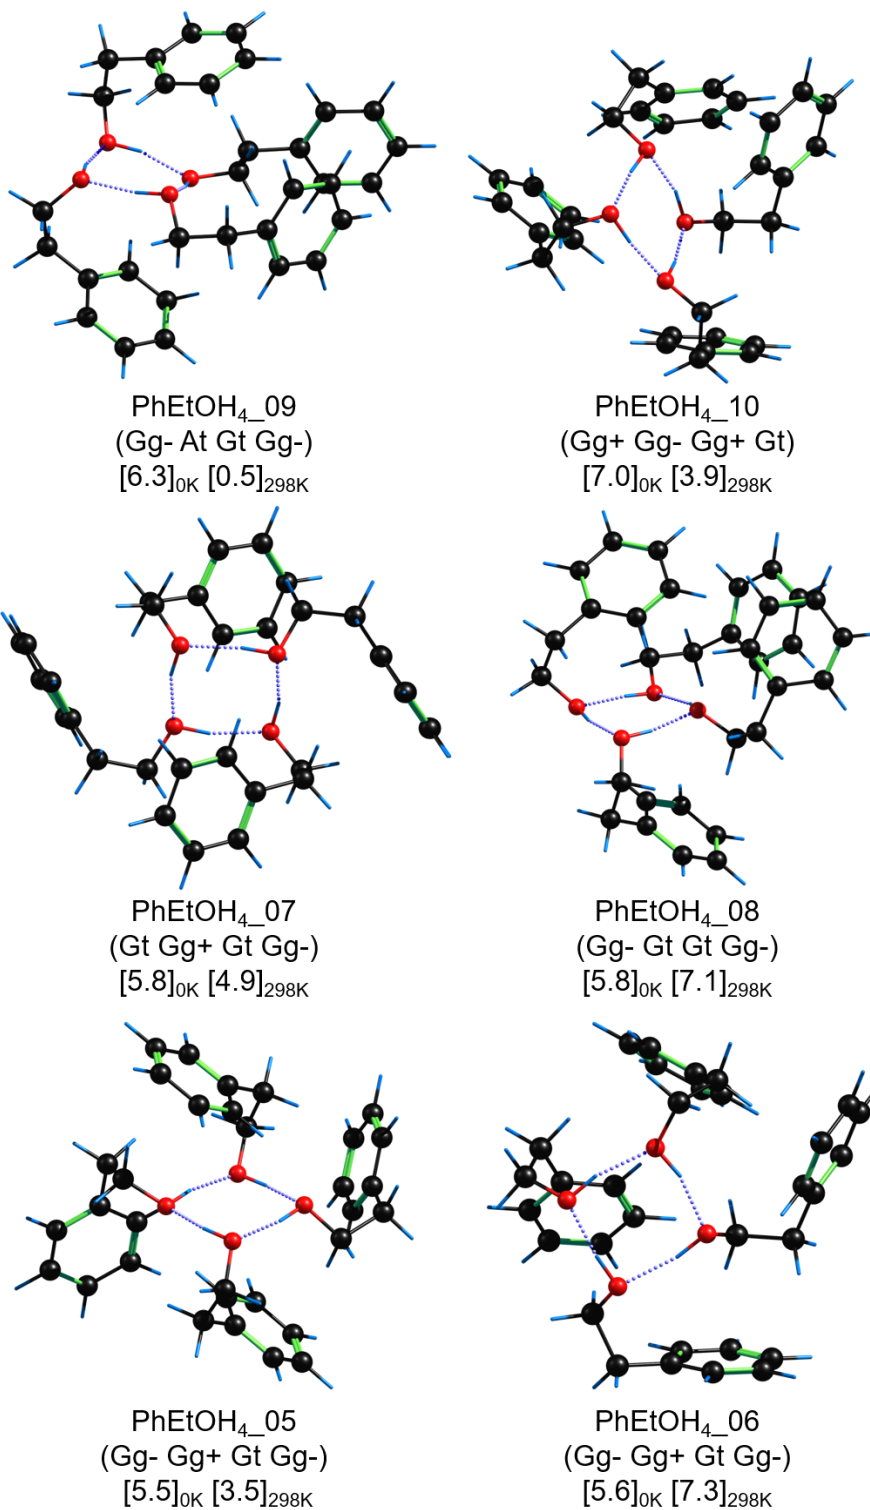

## 1. Supplementary Tables

**Table S1.** Prediction of the rotational and energetic parameters for 2-phenylethanol dimer using the B3LYP-D3(BJ) method and a polarized triple- $\zeta$  basis set (def2-TZVP).

| Isomer                                               | (PhEtOH)2_01            | (PhEtOH)2_02            | (PhEtOH)2_03            | (PhEtOH)2_04     | (PhEtOH)2_05            |
|------------------------------------------------------|-------------------------|-------------------------|-------------------------|------------------|-------------------------|
|                                                      | Gg $\pi$ +Gg $\pi$ -Lp- | Gg $\pi$ +Gg $\pi$ -Lp+ | Gg $\pi$ -Gg $\pi$ -Lp- | Gg $\pi$ -Gt Lp- | Gg $\pi$ +Gg $\pi$ -Lp+ |
| <i>A</i> / MHz <sup>a</sup>                          | 717.62                  | 563.87                  | 724.81                  | 563.75           | 606.63                  |
| <i>B</i> / MHz                                       | 280.79                  | 317.79                  | 274.57                  | 317.92           | 321.97                  |
| <i>C</i> / MHz                                       | 241.99                  | 288.68                  | 236.49                  | 288.73           | 289.01                  |
| <i>D<sub>J</sub></i> / kHz <sup>b</sup>              | 0.0187                  | 0.0338                  | 0.0111                  | 0.0249           | 0.0303                  |
| <i>D<sub>JK</sub></i> / kHz                          | -0.0450                 | 0.0056                  | -0.0055                 | 0.1154           | 0.1116                  |
| <i>D<sub>K</sub></i> / kHz                           | 0.1946                  | 0.0130                  | 0.1211                  | -0.0829          | -0.1146                 |
| <i>d<sub>1</sub></i> / kHz                           | -0.0040                 | 0.0013                  | -0.0017                 | -0.0025          | 0.0019                  |
| <i>d<sub>2</sub></i> / kHz                           | 0.0000                  | -0.0009                 | -0.0001                 | -0.0019          | -0.0022                 |
| $ \mu_a $ / D                                        | 2.34                    | 0.69                    | 2.25                    | 0.70             | 0.61                    |
| $ \mu_b $ / D                                        | 1.02                    | 1.37                    | 1.33                    | 1.36             | 1.73                    |
| $ \mu_c $ / D                                        | 1.95                    | 1.30                    | 0.08                    | 1.30             | 2.23                    |
| $\Delta E_{ZPE}$ / kJ mol <sup>-1</sup> <sup>c</sup> | 0.00                    | 0.13                    | 0.64                    | 6.09             | 7.13                    |
| $\Delta G$ / kJ mol <sup>-1</sup>                    | 0.00                    | 0.88                    | 1.38                    | 7.02             | 8.18                    |
| <i>E<sub>c</sub></i> / kJ mol <sup>-1</sup>          | -53.2                   | -55.5                   | -53.9                   | -59.8            | -48.2                   |

<sup>a</sup>Rotational constants (*A*, *B*, *C*). <sup>b</sup>Watson's S-reduction centrifugal distortion constants (*D<sub>J</sub>*, *D<sub>JK</sub>*, *D<sub>K</sub>*, *d<sub>1</sub>*, *d<sub>2</sub>*) and electric dipole moments ( $\mu_\alpha$ ,  $\alpha = a, b, c$ ). <sup>c</sup>Relative energy with zero-point corrections ( $\Delta E$ ), Gibbs energy ( $\Delta G$ , 298K, 1 atm) and complexation energy ( $\Delta E_c$  including BSSE corrections).

**Table S1.** Continued.

| Isomer                                               | (PhEtOH)2_06                | (PhEtOH)2_07               | (PhEtOH)2_08        | (PhEtOH)2_09                |
|------------------------------------------------------|-----------------------------|----------------------------|---------------------|-----------------------------|
|                                                      | Gg $\pi$ -Gg $\pi$ -<br>Lp- | Gg $\pi$ +G $\pi$ -<br>Lp+ | Gg $\pi$ +At<br>Lp- | Gg $\pi$ -Gg $\pi$ +<br>Lp+ |
| <i>A</i> / MHz <sup>a</sup>                          | 545.14                      | 529.61                     | 718.51              | 755.24                      |
| <i>B</i> / MHz                                       | 318.15                      | 345.65                     | 200.94              | 227.81                      |
| <i>C</i> / MHz                                       | 241.88                      | 318.60                     | 187.13              | 199.15                      |
| <i>D<sub>J</sub></i> / kHz <sup>b</sup>              | 0.0449                      | 0.0483                     | 0.0220              | 0.0195                      |
| <i>D<sub>JK</sub></i> / kHz                          | 0.0022                      | 0.0132                     | 0.2759              | -0.0545                     |
| <i>D<sub>K</sub></i> / kHz                           | 0.0959                      | -0.0256                    | 0.1637              | 0.2181                      |
| <i>d<sub>1</sub></i> / kHz                           | -0.0067                     | -0.0031                    | 0.0012              | -0.0023                     |
| <i>d<sub>2</sub></i> / kHz                           | -0.0029                     | -0.0004                    | 0.0002              | -0.0000                     |
| $ \mu_a $ / D                                        | 2.23                        | 0.05                       | 0.00                | 0.67                        |
| $ \mu_b $ / D                                        | 1.44                        | 2.30                       | 2.06                | 1.88                        |
| $ \mu_c $ / D                                        | 0.51                        | 0.45                       | 2.11                | 1.19                        |
| $\Delta E_{ZPE}$ / kJ mol <sup>-1</sup> <sup>d</sup> | 8.09                        | 8.65                       | 10.08               | 10.58                       |
| $\Delta G$ / kJ mol <sup>-1</sup>                    | 5.06                        | 9.29                       | 5.58                | 9.11                        |
| <i>E<sub>c</sub></i> / kJ mol <sup>-1</sup>          |                             | -57.4                      | -48.3               |                             |

<sup>a</sup>Rotational constants (*A*, *B*, *C*). <sup>b</sup>Watson's *S*-reduction centrifugal distortion constants (*D<sub>J</sub>*, *D<sub>JK</sub>*, *D<sub>K</sub>*, *d<sub>1</sub>*, *d<sub>2</sub>*) and electric dipole moments ( $\mu_\alpha$ ,  $\alpha = a, b, c$ ). <sup>c</sup>Relative energy with zero-point corrections ( $\Delta E$ ), Gibbs energy ( $\Delta G$ , 298K, 1 atm) and complexation energy ( $\Delta E_c$  including BSSE corrections).

**Table S1.** Continued.

| Isomer                                               | (PhEtOH) <sub>2</sub> _10 | (PhEtOH) <sub>2</sub> _11 |
|------------------------------------------------------|---------------------------|---------------------------|
|                                                      | Gt Gt                     | Ggπ-Ggπ-                  |
| <i>A</i> / MHz <sup>a</sup>                          | 739.46                    | 480.13                    |
| <i>B</i> / MHz                                       | 188.66                    | 378.80                    |
| <i>C</i> / MHz                                       | 173.80                    | 329.15                    |
| <i>D<sub>J</sub></i> / kHz <sup>b</sup>              | 0.0211                    | 0.0636                    |
| <i>D<sub>JK</sub></i> / kHz                          | 0.4625                    | 0.4786                    |
| <i>D<sub>K</sub></i> / kHz                           | 0.2009                    | -0.2275                   |
| <i>d<sub>1</sub></i> / kHz                           | 0.0048                    | 0.0358                    |
| <i>d<sub>2</sub></i> / kHz                           | -0.0001                   | -0.0207                   |
| <i>μ<sub>a</sub></i>   / D                           | 1.11                      | 0.01                      |
| <i>μ<sub>b</sub></i>   / D                           | 2.05                      | 1.06                      |
| <i>μ<sub>c</sub></i>   / D                           | 0.50                      | 0.00                      |
| $\Delta E_{ZPE}$ / kJ mol <sup>-1</sup> <sup>d</sup> | 11.48                     | 14.57                     |
| $\Delta G$ / kJ mol <sup>-1</sup>                    | 5.19                      | 9.19                      |
| <i>E<sub>c</sub></i> / kJ mol <sup>-1</sup>          | -48.5                     | -33.9                     |

<sup>a</sup>Rotational constants (*A*, *B*, *C*). <sup>b</sup>Watson's S-reduction centrifugal distortion constants (*D<sub>J</sub>*, *D<sub>JK</sub>*, *D<sub>K</sub>*, *d<sub>1</sub>*, *d<sub>2</sub>*) and electric dipole moments (*μ<sub>α</sub>*, *α* = a, b, c). <sup>c</sup>Relative energy with zero-point corrections ( $\Delta E$ ), Gibbs energy ( $\Delta G$ , 298K, 1 atm) and complexation energy ( $\Delta E_c$  including BSSE corrections).

**Table S2.** Comparison of the experimental parameters of 2-phenylethanol dimer with the predictions using the B3LYP-D3(BJ) method and a polarized triple- $\zeta$  basis set (def2-TZVP), together with the main structural parameters of the hydrogen bond.

|                                                                     | Experiment     |               |               | Theory                                     |                                            |                                            |
|---------------------------------------------------------------------|----------------|---------------|---------------|--------------------------------------------|--------------------------------------------|--------------------------------------------|
|                                                                     | I              | II            | III           | (PhEthOH)2_01<br>= Gg $\pi$ +Gg $\pi$ -Lp- | (PhEthOH)2_02<br>= Gg $\pi$ +Gg $\pi$ -Lp+ | (PhEthOH)2_03<br>= Gg $\pi$ -Gg $\pi$ -Lp- |
| $A$ / MHz <sup>a</sup>                                              | 708.07951(20)  | 563.05177(29) | 713.30267(39) | 717.6                                      | 563.9                                      | 724.8                                      |
| $B$ / MHz                                                           | 276.410756(99) | 313.31209(20) | 271.81195(16) | 280.8                                      | 317.8                                      | 274.6                                      |
| $C$ / MHz                                                           | 237.62572(10)  | 286.68383(24) | 233.31321(16) | 242.0                                      | 288.7                                      | 236.5                                      |
| $D_J$ / kHz                                                         | 0.02024(26)    | 0.0415(11)    | 0.01339(37)   | 0.019                                      | 0.034                                      | 0.011                                      |
| $D_{JK}$ / kHz                                                      | -0.04231(88)   | [ 0.]         | -0.0068(14)   | -0.045                                     | 0.006                                      | -0.006                                     |
| $D_K$ / kHz                                                         | 0.1948(29)     | 0.0187(30)    | 0.1498(84)    | 0.195                                      | 0.013                                      | 0.121                                      |
| $d_1$ / kHz                                                         | -0.00434(16)   | [ 0.]         | -0.00212(29)  | -0.004                                     | 0.001                                      | -0.002                                     |
| $d_2$ / kHz                                                         | [ 0.]          | [ 0.]         | [ 0.]         | 0.0                                        | -0.001                                     | 0.0                                        |
| $\sigma$ / kHz <sup>b</sup>                                         | 9.8            | 10.6          | 12.6          |                                            |                                            |                                            |
| $N$                                                                 | 438            | 193           | 310           |                                            |                                            |                                            |
| $\Delta E_{ZPE}$ / kJ mol <sup>-1</sup>                             |                |               |               | 0.0                                        | 0.1                                        | 0.6                                        |
| $\Delta G$ / kJ mol <sup>-1</sup>                                   |                |               |               | 0.0                                        | 0.9                                        | 1.4                                        |
| $E_c$ / kJ mol <sup>-1</sup>                                        |                |               |               | -53.2                                      | -55.5                                      | -53.9                                      |
| <u>Hydrogen Bond Donor</u> <sup>b</sup>                             |                |               |               |                                            |                                            |                                            |
| $\tau$ (HO-C $_{\beta}$ C $_{\alpha}$ ) /deg                        |                |               |               | 77.6                                       | 83.8                                       | -80.2                                      |
| $\tau$ (OC $_{\beta}$ -C $_{\alpha}$ C $_{ipso}$ ) /deg             |                |               |               | -63.2                                      | -61.5                                      | 59.6                                       |
| $\tau$ (C $_{\beta}$ C $_{\alpha}$ -C $_{ipso}$ C $_{ortho}$ ) /deg |                |               |               | -80.5                                      | -82.6                                      | 76.2                                       |
| <u>Hydrogen Bond Acceptor</u>                                       |                |               |               |                                            |                                            |                                            |
| $\tau$ (HO-C $_{\beta}$ C $_{\alpha}$ ) /deg                        |                |               |               | -73.5                                      | -78.4                                      | -74.3                                      |
| $\tau$ (OC $_{\beta}$ -C $_{\alpha}$ C $_{ipso}$ ) /deg             |                |               |               | 63.3                                       | 62.2                                       | 64.7                                       |
| $\tau$ (C $_{\beta}$ C $_{\alpha}$ -C $_{ipso}$ C $_{ortho}$ ) /deg |                |               |               | 85.3                                       | 72.5                                       | 88.2                                       |
| $r$ (O-H $\cdots$ O) / Å                                            |                |               |               | 1.879                                      | 1.856                                      | 1.881                                      |
| $\angle$ (O-H $\cdots$ O) / deg                                     |                |               |               | 173.7                                      | 174.4                                      | 179.0                                      |
| $r$ (O-H $\cdots$ centroid) / Å                                     |                |               |               | 2.411                                      | 2.380                                      | 2.357                                      |
| $r$ (C-H $\cdots$ centroid) / Å                                     |                |               |               | 2.890                                      | 2.932                                      | 2.785                                      |

<sup>a</sup>Parameter definition as in Table S1. <sup>b</sup>Structural parameters of the hydrogen bond.



**Table S3.** Prediction of the rotational and energetic parameters for 2-phenylethanol dimer using the B2PLYP-D3(BJ) method and a polarized triple- $\zeta$  basis set (def2-TZVP).

| Isomer                                      | (PhEthOH)2_01           | (PhEthOH)2_02           | (PhEthOH)2_03           |
|---------------------------------------------|-------------------------|-------------------------|-------------------------|
|                                             | Gg $\pi$ +Gg $\pi$ -Lp- | Gg $\pi$ +Gg $\pi$ -Lp+ | Gg $\pi$ -Gg $\pi$ -Lp- |
| <i>A</i> / MHz <sup>a</sup>                 | 718.18                  | 565.28                  | 724.45                  |
| <i>B</i> / MHz                              | 279.97                  | 318.05                  | 274.73                  |
| <i>C</i> / MHz                              | 241.43                  | 289.36                  | 236.37                  |
| <i>D<sub>J</sub></i> / kHz <sup>b</sup>     | 0.0182                  | 0.0350                  | 0.0113                  |
| <i>D<sub>JK</sub></i> / kHz                 | -0.0402                 | 0.0000                  | -0.0051                 |
| <i>D<sub>K</sub></i> / kHz                  | 0.1819                  | 0.0216                  | 0.1243                  |
| <i>d<sub>1</sub></i> / kHz                  | -0.0039                 | 0.0013                  | -0.0017                 |
| <i>d<sub>2</sub></i> / kHz                  | -0.0001                 | -0.0009                 | -0.0001                 |
| $ \mu_a $ / D                               | 2.34                    | 0.70                    | 2.24                    |
| $ \mu_b $ / D                               | 1.01                    | 1.36                    | 1.33                    |
| $ \mu_c $ / D                               | 1.99                    | 1.34                    | 0.07                    |
| $\Delta E_{ZPE}$ / kJ mol <sup>-1c</sup>    | 0.00                    | 0.10                    | 0.43                    |
| $\Delta G$ / kJ mol <sup>-1</sup>           | 0.00                    | 0.73                    | 1.11                    |
| <i>E<sub>c</sub></i> / kJ mol <sup>-1</sup> | -48.4                   | -50.6                   | -49.2                   |

<sup>a</sup>Rotational constants (*A*, *B*, *C*). <sup>b</sup>Watson's S-reduction centrifugal distortion constants (*D<sub>J</sub>*, *D<sub>JK</sub>*, *D<sub>K</sub>*, *d<sub>1</sub>*, *d<sub>2</sub>*) and electric dipole moments ( $\mu_\alpha$ ,  $\alpha = a, b, c$ ). <sup>c</sup>Relative energy with zero-point corrections ( $\Delta E$ ), Gibbs energy ( $\Delta G$ , 298K, 1 atm) and complexation energy ( $\Delta E_c$  including BSSE corrections).

**Table S4.** Prediction of the rotational and energetic parameters for 2-phenylethanol dimer using the MP2 method and a polarized triple- $\zeta$  basis set (def2-TZVP).

| Isomer                                               | (PhEthOH)2_01           | (PhEthOH)2_02           | (PhEthOH)2_03           |
|------------------------------------------------------|-------------------------|-------------------------|-------------------------|
|                                                      | Gg $\pi$ +Gg $\pi$ -Lp- | Gg $\pi$ +Gg $\pi$ -Lp+ | Gg $\pi$ -Gg $\pi$ -Lp- |
| <i>A</i> / MHz <sup>a</sup>                          | 736.53                  | 574.68                  | 743.24                  |
| <i>B</i> / MHz                                       | 284.82                  | 328.00                  | 280.32                  |
| <i>C</i> / MHz                                       | 247.57                  | 300.83                  | 242.10                  |
| <i>D<sub>J</sub></i> / kHz <sup>b</sup>              | 0.0145                  | 0.0291                  | 0.0097                  |
| <i>D<sub>JK</sub></i> / kHz                          | -0.0243                 | 0.0034                  | -0.0012                 |
| <i>D<sub>K</sub></i> / kHz                           | 0.1317                  | 0.0079                  | 0.0983                  |
| <i>d<sub>1</sub></i> / kHz                           | -0.0029                 | 0.0004                  | -0.0015                 |
| <i>d<sub>2</sub></i> / kHz                           | 0.00                    | -0.0008                 | -0.0001                 |
| $ \mu_a $ / D                                        | 2.38                    | 0.78                    | 2.28                    |
| $ \mu_b $ / D                                        | 0.97                    | 1.35                    | 1.34                    |
| $ \mu_c $ / D                                        | 2.06                    | 1.39                    | 0.08                    |
| $\Delta E_{ZPE}$ / kJ mol <sup>-1</sup> <sup>c</sup> | 0.00                    | 0.74                    | 0.27                    |
| $\Delta G$ / kJ mol <sup>-1</sup>                    | 0.00                    | 0.66                    | 0.62                    |
| <i>E<sub>c</sub></i> / kJ mol <sup>-1</sup>          | -50.8                   | -52.5                   | -51.6                   |

<sup>a</sup>Rotational constants (*A*, *B*, *C*). <sup>b</sup>Watson's S-reduction centrifugal distortion constants (*D<sub>J</sub>*, *D<sub>JK</sub>*, *D<sub>K</sub>*, *d<sub>1</sub>*, *d<sub>2</sub>*) and electric dipole moments ( $\mu_\alpha$ ,  $\alpha = a, b, c$ ). <sup>c</sup>Relative energy with zero-point corrections ( $\Delta E$ ), Gibbs energy ( $\Delta G$ , 298K, 1 atm) and complexation energy ( $\Delta E_c$  including BSSE corrections).

**Table S5.** Observed rotational transitions of isomer I (Gg $\pi$ +Gg $\pi$ -Lp-) of 2-phenylethanol dimer (Freq.), together with the differences with the calculated transitions (o.-c.) for the fit of Table 1 and estimated frequency uncertainties (unc.). All values in MHz.

| <i>N</i> | <i>J'</i> | <i>K<sub>-1</sub>'</i> | <i>K<sub>+1</sub>'</i> | <i>J''</i> | <i>K<sub>-1</sub>''</i> | <i>K<sub>+1</sub>''</i> | <i>Freq. / MHz</i> | <i>o-c / MHz</i> | <i>unc. / MHz</i> |
|----------|-----------|------------------------|------------------------|------------|-------------------------|-------------------------|--------------------|------------------|-------------------|
| 1        | 4         | 0                      | 4                      | 3          | 0                       | 3                       | 2031.7642          | 0.000            | 0.020             |
| 2        | 4         | 2                      | 3                      | 3          | 2                       | 2                       | 2054.2087          | 0.011            | 0.020             |
| 3        | 7         | 3                      | 5                      | 7          | 2                       | 5                       | 2056.7761          | 0.009            | 0.020             |
| 4        | 7         | 3                      | 4                      | 7          | 2                       | 5                       | 2077.3749          | 0.026            | 0.020             |
| 5        | 4         | 2                      | 2                      | 3          | 2                       | 1                       | 2078.5728          | 0.002            | 0.020             |
| 6        | 8         | 2                      | 7                      | 8          | 1                       | 8                       | 2082.3365          | -0.011           | 0.020             |
| 7        | 3         | 1                      | 2                      | 2          | 0                       | 2                       | 2110.3993          | -0.007           | 0.020             |
| 8        | 4         | 1                      | 3                      | 3          | 1                       | 2                       | 2128.4044          | 0.004            | 0.020             |
| 9        | 6         | 3                      | 4                      | 6          | 2                       | 4                       | 2137.2355          | 0.008            | 0.020             |
| 10       | 5         | 3                      | 3                      | 5          | 2                       | 3                       | 2192.7230          | 0.002            | 0.020             |
| 11       | 4         | 3                      | 2                      | 4          | 2                       | 2                       | 2226.6654          | -0.004           | 0.020             |
| 12       | 5         | 0                      | 5                      | 4          | 1                       | 4                       | 2235.3552          | -0.001           | 0.020             |
| 13       | 4         | 3                      | 1                      | 4          | 2                       | 3                       | 2264.1694          | 0.002            | 0.020             |
| 14       | 5         | 3                      | 2                      | 5          | 2                       | 4                       | 2279.3915          | 0.000            | 0.020             |
| 15       | 6         | 3                      | 4                      | 6          | 2                       | 5                       | 2298.8823          | 0.002            | 0.020             |
| 16       | 6         | 3                      | 3                      | 6          | 2                       | 5                       | 2307.2145          | -0.006           | 0.020             |
| 17       | 4         | 1                      | 4                      | 3          | 0                       | 3                       | 2319.4854          | 0.006            | 0.020             |
| 18       | 7         | 3                      | 4                      | 7          | 2                       | 6                       | 2353.6753          | -0.008           | 0.020             |
| 19       | 2         | 2                      | 0                      | 1          | 1                       | 0                       | 2364.3431          | -0.016           | 0.020             |
| 20       | 8         | 3                      | 6                      | 8          | 2                       | 7                       | 2381.8988          | 0.000            | 0.020             |
| 21       | 2         | 2                      | 1                      | 1          | 1                       | 1                       | 2400.6424          | -0.004           | 0.020             |
| 22       | 8         | 3                      | 5                      | 8          | 2                       | 7                       | 2426.3277          | 0.046            | 0.020             |
| 23       | 5         | 1                      | 5                      | 4          | 1                       | 4                       | 2463.2804          | -0.011           | 0.020             |
| 24       | 5         | 0                      | 5                      | 4          | 0                       | 4                       | 2523.0783          | 0.007            | 0.020             |
| 25       | 7         | 1                      | 6                      | 6          | 2                       | 4                       | 2564.0133          | -0.012           | 0.020             |
| 26       | 5         | 2                      | 4                      | 4          | 2                       | 3                       | 2564.6254          | 0.000            | 0.020             |
| 27       | 5         | 4                      | 2                      | 4          | 4                       | 1                       | 2575.7364          | 0.009            | 0.020             |
| 28       | 5         | 4                      | 1                      | 4          | 4                       | 0                       | 2575.7364          | -0.018           | 0.020             |
| 29       | 5         | 3                      | 3                      | 4          | 3                       | 2                       | 2577.7462          | -0.005           | 0.020             |
| 30       | 5         | 3                      | 2                      | 4          | 3                       | 1                       | 2579.8490          | -0.001           | 0.020             |
| 31       | 5         | 2                      | 3                      | 4          | 2                       | 2                       | 2611.6983          | -0.001           | 0.020             |
| 32       | 5         | 1                      | 4                      | 4          | 1                       | 3                       | 2655.1195          | 0.006            | 0.020             |
| 33       | 11        | 2                      | 10                     | 11         | 1                       | 11                      | 2681.5347          | 0.025            | 0.020             |
| 34       | 4         | 1                      | 3                      | 3          | 0                       | 3                       | 2706.6238          | 0.002            | 0.020             |
| 35       | 5         | 1                      | 5                      | 4          | 0                       | 4                       | 2751.0049          | -0.001           | 0.020             |
| 36       | 6         | 0                      | 6                      | 5          | 1                       | 5                       | 2778.3546          | -0.007           | 0.020             |
| 37       | 9         | 2                      | 7                      | 8          | 3                       | 5                       | 2783.5375          | 0.008            | 0.020             |
| 38       | 12        | 4                      | 9                      | 12         | 3                       | 9                       | 2793.7216          | 0.014            | 0.020             |
| 39       | 3         | 2                      | 2                      | 2          | 1                       | 1                       | 2837.1182          | 0.006            | 0.020             |
| 40       | 3         | 2                      | 1                      | 2          | 1                       | 1                       | 2849.5326          | 0.000            | 0.020             |
| 41       | 11        | 2                      | 10                     | 10         | 3                       | 7                       | 2887.3423          | 0.008            | 0.020             |
| 42       | 11        | 3                      | 8                      | 11         | 2                       | 10                      | 2891.3394          | 0.011            | 0.020             |
| 43       | 11        | 4                      | 8                      | 11         | 3                       | 8                       | 2910.4835          | 0.001            | 0.020             |
| 44       | 6         | 1                      | 6                      | 5          | 1                       | 5                       | 2950.5197          | 0.007            | 0.020             |
| 45       | 3         | 2                      | 2                      | 2          | 1                       | 2                       | 2953.4718          | 0.005            | 0.020             |
| 46       | 3         | 2                      | 1                      | 2          | 1                       | 2                       | 2965.8769          | -0.011           | 0.020             |
| 47       | 10        | 4                      | 7                      | 10         | 3                       | 7                       | 2997.7744          | 0.005            | 0.020             |
| 48       | 6         | 0                      | 6                      | 5          | 0                       | 5                       | 3006.3025          | 0.006            | 0.020             |

|     |    |   |    |    |   |    |           |        |       |
|-----|----|---|----|----|---|----|-----------|--------|-------|
| 49  | 10 | 4 | 6  | 10 | 3 | 7  | 3007.5315 | 0.004  | 0.020 |
| 50  | 12 | 3 | 10 | 11 | 4 | 8  | 3024.7118 | 0.000  | 0.020 |
| 51  | 9  | 4 | 6  | 9  | 3 | 6  | 3059.1943 | 0.005  | 0.020 |
| 52  | 6  | 2 | 5  | 5  | 2 | 4  | 3072.9981 | 0.002  | 0.020 |
| 53  | 8  | 1 | 7  | 7  | 2 | 5  | 3075.2559 | -0.006 | 0.020 |
| 54  | 6  | 5 | 2  | 5  | 5 | 1  | 3090.4736 | 0.004  | 0.020 |
| 55  | 6  | 5 | 1  | 5  | 5 | 0  | 3090.4736 | 0.003  | 0.020 |
| 56  | 6  | 4 | 3  | 5  | 4 | 2  | 3092.6757 | 0.012  | 0.020 |
| 57  | 6  | 4 | 2  | 5  | 4 | 1  | 3092.7649 | -0.020 | 0.020 |
| 58  | 6  | 3 | 4  | 5  | 3 | 3  | 3095.2894 | 0.002  | 0.020 |
| 59  | 8  | 4 | 5  | 8  | 3 | 5  | 3099.8782 | 0.006  | 0.020 |
| 60  | 6  | 3 | 3  | 5  | 3 | 2  | 3100.8254 | 0.000  | 0.020 |
| 61  | 7  | 4 | 4  | 7  | 3 | 4  | 3125.2413 | -0.009 | 0.020 |
| 62  | 7  | 4 | 3  | 7  | 3 | 4  | 3125.8073 | 0.006  | 0.020 |
| 63  | 6  | 4 | 3  | 6  | 3 | 3  | 3140.1286 | -0.008 | 0.020 |
| 64  | 8  | 4 | 5  | 8  | 3 | 6  | 3144.2595 | 0.004  | 0.020 |
| 65  | 9  | 4 | 6  | 9  | 3 | 7  | 3145.4024 | 0.010  | 0.020 |
| 66  | 8  | 4 | 4  | 8  | 3 | 6  | 3145.8893 | -0.011 | 0.020 |
| 67  | 7  | 4 | 3  | 7  | 3 | 5  | 3146.3906 | 0.008  | 0.020 |
| 68  | 6  | 4 | 2  | 6  | 3 | 4  | 3148.6311 | 0.003  | 0.020 |
| 69  | 9  | 4 | 5  | 9  | 3 | 7  | 3149.6318 | 0.003  | 0.020 |
| 70  | 6  | 2 | 4  | 5  | 2 | 3  | 3150.7857 | 0.005  | 0.020 |
| 71  | 10 | 4 | 6  | 10 | 3 | 8  | 3161.1522 | -0.003 | 0.020 |
| 72  | 6  | 1 | 5  | 5  | 1 | 4  | 3177.6826 | 0.006  | 0.020 |
| 73  | 6  | 1 | 6  | 5  | 0 | 5  | 3178.4478 | 0.000  | 0.020 |
| 74  | 11 | 4 | 7  | 11 | 3 | 9  | 3185.3758 | 0.000  | 0.020 |
| 75  | 12 | 4 | 8  | 12 | 3 | 10 | 3228.6176 | -0.008 | 0.020 |
| 76  | 7  | 0 | 7  | 6  | 1 | 6  | 3311.0015 | 0.008  | 0.020 |
| 77  | 4  | 2 | 2  | 3  | 1 | 2  | 3329.4301 | -0.003 | 0.020 |
| 78  | 5  | 1 | 4  | 4  | 0 | 4  | 3329.9788 | 0.008  | 0.020 |
| 79  | 8  | 1 | 7  | 7  | 2 | 6  | 3351.5959 | 0.000  | 0.020 |
| 80  | 14 | 4 | 10 | 14 | 3 | 12 | 3404.7260 | -0.013 | 0.020 |
| 81  | 10 | 2 | 8  | 9  | 3 | 6  | 3408.8547 | 0.002  | 0.020 |
| 82  | 7  | 1 | 7  | 6  | 1 | 6  | 3435.5146 | 0.002  | 0.020 |
| 83  | 7  | 0 | 7  | 6  | 0 | 6  | 3483.1487 | 0.003  | 0.020 |
| 84  | 4  | 2 | 3  | 3  | 1 | 3  | 3525.2519 | 0.004  | 0.020 |
| 85  | 9  | 1 | 8  | 8  | 2 | 6  | 3544.7147 | -0.006 | 0.020 |
| 86  | 15 | 1 | 14 | 15 | 0 | 15 | 3560.0620 | 0.008  | 0.020 |
| 87  | 7  | 2 | 6  | 6  | 2 | 5  | 3578.9471 | 0.005  | 0.020 |
| 88  | 7  | 6 | 1  | 6  | 6 | 0  | 3605.2619 | 0.006  | 0.020 |
| 89  | 7  | 6 | 2  | 6  | 6 | 1  | 3605.2619 | 0.006  | 0.020 |
| 90  | 7  | 5 | 3  | 6  | 5 | 2  | 3607.1280 | 0.006  | 0.020 |
| 91  | 7  | 5 | 2  | 6  | 5 | 1  | 3607.1280 | 0.000  | 0.020 |
| 92  | 7  | 1 | 7  | 6  | 0 | 6  | 3607.6621 | -0.003 | 0.020 |
| 93  | 7  | 4 | 4  | 6  | 4 | 3  | 3610.5179 | 0.000  | 0.020 |
| 94  | 7  | 4 | 3  | 6  | 4 | 2  | 3610.9121 | -0.006 | 0.020 |
| 95  | 7  | 3 | 5  | 6  | 3 | 4  | 3613.1705 | 0.007  | 0.020 |
| 96  | 7  | 3 | 4  | 6  | 3 | 3  | 3625.4038 | -0.001 | 0.020 |
| 97  | 7  | 2 | 5  | 6  | 2 | 4  | 3693.6257 | 0.002  | 0.020 |
| 98  | 7  | 1 | 6  | 6  | 1 | 5  | 3694.7538 | 0.004  | 0.020 |
| 99  | 5  | 2 | 4  | 4  | 1 | 3  | 3728.8640 | -0.001 | 0.020 |
| 100 | 15 | 5 | 11 | 15 | 4 | 11 | 3780.6456 | -0.003 | 0.020 |
| 101 | 3  | 3 | 0  | 2  | 2 | 0  | 3796.5261 | 0.005  | 0.020 |
| 102 | 3  | 3 | 1  | 2  | 2 | 1  | 3798.9156 | -0.003 | 0.020 |
| 103 | 5  | 2 | 3  | 4  | 1 | 3  | 3812.7367 | 0.004  | 0.020 |
| 104 | 8  | 0 | 8  | 7  | 1 | 7  | 3831.6223 | 0.009  | 0.020 |

|     |    |   |    |    |   |    |           |        |       |
|-----|----|---|----|----|---|----|-----------|--------|-------|
| 105 | 14 | 5 | 10 | 14 | 4 | 10 | 3865.4325 | 0.019  | 0.020 |
| 106 | 8  | 1 | 8  | 7  | 1 | 7  | 3918.4181 | -0.003 | 0.020 |
| 107 | 13 | 5 | 9  | 13 | 4 | 9  | 3926.5737 | -0.008 | 0.020 |
| 108 | 8  | 0 | 8  | 7  | 0 | 7  | 3956.1302 | -0.002 | 0.020 |
| 109 | 10 | 1 | 9  | 9  | 2 | 7  | 3965.4250 | -0.010 | 0.020 |
| 110 | 9  | 1 | 8  | 8  | 2 | 7  | 3976.0625 | -0.018 | 0.020 |
| 111 | 15 | 4 | 11 | 14 | 5 | 9  | 3983.1624 | -0.008 | 0.020 |
| 112 | 6  | 1 | 5  | 5  | 0 | 5  | 3984.5751 | -0.002 | 0.020 |
| 113 | 11 | 5 | 7  | 11 | 4 | 7  | 3999.3077 | 0.006  | 0.020 |
| 114 | 14 | 5 | 9  | 14 | 4 | 11 | 4001.3219 | 0.003  | 0.020 |
| 115 | 13 | 5 | 8  | 13 | 4 | 10 | 4004.3380 | -0.002 | 0.020 |
| 116 | 15 | 5 | 10 | 15 | 4 | 12 | 4006.3321 | 0.001  | 0.020 |
| 117 | 12 | 5 | 7  | 12 | 4 | 9  | 4011.6553 | -0.003 | 0.020 |
| 118 | 10 | 5 | 6  | 10 | 4 | 6  | 4019.5160 | -0.014 | 0.020 |
| 119 | 10 | 5 | 5  | 10 | 4 | 6  | 4019.8398 | 0.008  | 0.020 |
| 120 | 11 | 5 | 7  | 11 | 4 | 8  | 4019.8398 | -0.007 | 0.020 |
| 121 | 11 | 5 | 6  | 11 | 4 | 8  | 4020.6421 | -0.003 | 0.020 |
| 122 | 11 | 2 | 9  | 10 | 3 | 7  | 4023.2625 | 0.002  | 0.020 |
| 123 | 9  | 5 | 5  | 9  | 4 | 5  | 4033.1526 | -0.011 | 0.020 |
| 124 | 9  | 5 | 4  | 9  | 4 | 6  | 4037.5117 | 0.010  | 0.020 |
| 125 | 8  | 1 | 8  | 7  | 0 | 7  | 4042.9511 | 0.010  | 0.020 |
| 126 | 8  | 2 | 7  | 7  | 2 | 6  | 4082.1451 | 0.006  | 0.020 |
| 127 | 5  | 2 | 4  | 4  | 1 | 4  | 4116.0090 | 0.001  | 0.020 |
| 128 | 8  | 7 | 1  | 7  | 7 | 0  | 4120.0648 | -0.004 | 0.020 |
| 129 | 8  | 7 | 2  | 7  | 7 | 1  | 4120.0648 | -0.004 | 0.020 |
| 130 | 8  | 6 | 3  | 7  | 6 | 2  | 4121.7108 | -0.003 | 0.020 |
| 131 | 8  | 6 | 2  | 7  | 6 | 1  | 4121.7108 | -0.003 | 0.020 |
| 132 | 8  | 5 | 4  | 7  | 5 | 3  | 4124.5114 | 0.011  | 0.020 |
| 133 | 8  | 5 | 3  | 7  | 5 | 2  | 4124.5114 | -0.011 | 0.020 |
| 134 | 8  | 4 | 5  | 7  | 4 | 4  | 4129.3635 | 0.002  | 0.020 |
| 135 | 8  | 4 | 4  | 7  | 4 | 3  | 4130.4570 | 0.003  | 0.020 |
| 136 | 8  | 3 | 6  | 7  | 3 | 5  | 4130.9369 | 0.000  | 0.020 |
| 137 | 6  | 2 | 5  | 5  | 1 | 4  | 4146.7571 | 0.009  | 0.020 |
| 138 | 8  | 3 | 5  | 7  | 3 | 4  | 4154.7366 | -0.002 | 0.020 |
| 139 | 8  | 1 | 7  | 7  | 1 | 6  | 4204.8559 | -0.004 | 0.020 |
| 140 | 8  | 2 | 6  | 7  | 2 | 5  | 4237.1699 | 0.005  | 0.020 |
| 141 | 15 | 3 | 13 | 14 | 4 | 10 | 4300.8911 | 0.024  | 0.020 |
| 142 | 4  | 3 | 2  | 3  | 2 | 1  | 4305.2300 | -0.010 | 0.020 |
| 143 | 4  | 3 | 1  | 3  | 2 | 1  | 4305.9420 | -0.002 | 0.020 |
| 144 | 6  | 2 | 4  | 5  | 1 | 4  | 4308.4047 | 0.004  | 0.020 |
| 145 | 4  | 3 | 2  | 3  | 2 | 2  | 4317.6620 | 0.001  | 0.020 |
| 146 | 11 | 1 | 10 | 10 | 2 | 8  | 4332.8478 | 0.005  | 0.020 |
| 147 | 9  | 0 | 9  | 8  | 1 | 8  | 4340.7445 | -0.005 | 0.020 |
| 148 | 9  | 1 | 9  | 8  | 1 | 8  | 4399.4827 | 0.007  | 0.020 |
| 149 | 9  | 0 | 9  | 8  | 0 | 8  | 4427.5647 | 0.007  | 0.020 |
| 150 | 9  | 1 | 9  | 8  | 0 | 8  | 4486.2778 | -0.007 | 0.020 |
| 151 | 9  | 2 | 8  | 8  | 2 | 7  | 4582.3377 | 0.005  | 0.020 |
| 152 | 12 | 2 | 10 | 11 | 3 | 8  | 4613.4140 | -0.010 | 0.020 |
| 153 | 9  | 7 | 2  | 8  | 7 | 1  | 4636.3848 | -0.010 | 0.020 |
| 154 | 9  | 7 | 3  | 8  | 7 | 2  | 4636.3848 | -0.010 | 0.020 |
| 155 | 9  | 6 | 4  | 8  | 6 | 3  | 4638.7405 | -0.001 | 0.020 |
| 156 | 9  | 6 | 3  | 8  | 6 | 2  | 4638.7405 | -0.002 | 0.020 |
| 157 | 9  | 5 | 5  | 8  | 5 | 4  | 4642.7428 | 0.040  | 0.020 |
| 158 | 9  | 5 | 4  | 8  | 5 | 3  | 4642.7428 | -0.032 | 0.020 |
| 159 | 9  | 3 | 7  | 8  | 3 | 6  | 4648.0618 | 0.002  | 0.020 |
| 160 | 9  | 4 | 6  | 8  | 4 | 5  | 4649.2018 | 0.006  | 0.020 |

|     |    |   |    |    |   |    |           |        |       |
|-----|----|---|----|----|---|----|-----------|--------|-------|
| 161 | 9  | 4 | 5  | 8  | 4 | 4  | 4651.7878 | 0.000  | 0.020 |
| 162 | 7  | 1 | 6  | 6  | 0 | 6  | 4673.0206 | -0.010 | 0.020 |
| 163 | 9  | 3 | 6  | 8  | 3 | 5  | 4689.8815 | 0.003  | 0.020 |
| 164 | 9  | 1 | 8  | 8  | 1 | 7  | 4706.6244 | 0.000  | 0.020 |
| 165 | 6  | 2 | 5  | 5  | 1 | 5  | 4725.7183 | 0.005  | 0.020 |
| 166 | 9  | 2 | 7  | 8  | 2 | 6  | 4778.4492 | -0.003 | 0.020 |
| 167 | 5  | 3 | 3  | 4  | 2 | 2  | 4804.4144 | -0.006 | 0.020 |
| 168 | 5  | 3 | 2  | 4  | 2 | 2  | 4807.2268 | 0.004  | 0.020 |
| 169 | 7  | 2 | 5  | 6  | 1 | 5  | 4824.3496 | 0.001  | 0.020 |
| 170 | 10 | 0 | 10 | 9  | 1 | 9  | 4840.1865 | -0.003 | 0.020 |
| 171 | 5  | 3 | 3  | 4  | 2 | 3  | 4841.2165 | 0.002  | 0.020 |
| 172 | 5  | 3 | 2  | 4  | 2 | 3  | 4844.0409 | 0.024  | 0.020 |
| 173 | 15 | 6 | 10 | 15 | 5 | 10 | 4867.6016 | -0.004 | 0.020 |
| 174 | 10 | 1 | 10 | 9  | 1 | 9  | 4878.9815 | 0.006  | 0.020 |
| 175 | 15 | 6 | 9  | 15 | 5 | 11 | 4885.7654 | 0.008  | 0.020 |
| 176 | 10 | 0 | 10 | 9  | 0 | 9  | 4898.9223 | 0.007  | 0.020 |
| 177 | 13 | 6 | 8  | 13 | 5 | 8  | 4909.8961 | -0.003 | 0.020 |
| 178 | 10 | 1 | 10 | 9  | 0 | 9  | 4937.6947 | -0.008 | 0.020 |
| 179 | 8  | 6 | 3  | 8  | 5 | 3  | 4951.0414 | 0.010  | 0.020 |
| 180 | 8  | 6 | 2  | 8  | 5 | 3  | 4951.0414 | 0.010  | 0.020 |
| 181 | 8  | 6 | 3  | 8  | 5 | 4  | 4951.0414 | -0.019 | 0.020 |
| 182 | 8  | 6 | 2  | 8  | 5 | 4  | 4951.0414 | -0.019 | 0.020 |
| 183 | 7  | 6 | 2  | 7  | 5 | 2  | 4953.8553 | 0.015  | 0.020 |
| 184 | 7  | 6 | 1  | 7  | 5 | 2  | 4953.8553 | 0.015  | 0.020 |
| 185 | 7  | 6 | 2  | 7  | 5 | 3  | 4953.8553 | 0.008  | 0.020 |
| 186 | 7  | 6 | 1  | 7  | 5 | 3  | 4953.8553 | 0.008  | 0.020 |
| 187 | 10 | 2 | 9  | 9  | 2 | 8  | 5079.3586 | 0.001  | 0.020 |
| 188 | 14 | 1 | 13 | 13 | 2 | 11 | 5118.8428 | -0.015 | 0.020 |
| 189 | 10 | 9 | 1  | 9  | 9 | 0  | 5149.7461 | 0.010  | 0.020 |
| 190 | 10 | 9 | 2  | 9  | 9 | 1  | 5149.7461 | 0.010  | 0.020 |
| 191 | 10 | 8 | 2  | 9  | 8 | 1  | 5151.1122 | -0.016 | 0.020 |
| 192 | 10 | 8 | 3  | 9  | 8 | 2  | 5151.1122 | -0.016 | 0.020 |
| 193 | 10 | 7 | 3  | 9  | 7 | 2  | 5153.1776 | -0.010 | 0.020 |
| 194 | 10 | 7 | 4  | 9  | 7 | 3  | 5153.1776 | -0.010 | 0.020 |
| 195 | 10 | 6 | 5  | 9  | 6 | 4  | 5156.4200 | 0.007  | 0.020 |
| 196 | 10 | 6 | 4  | 9  | 6 | 3  | 5156.4200 | 0.003  | 0.020 |
| 197 | 10 | 5 | 6  | 9  | 5 | 5  | 5161.8251 | 0.003  | 0.020 |
| 198 | 10 | 5 | 5  | 9  | 5 | 4  | 5162.0148 | -0.008 | 0.020 |
| 199 | 10 | 3 | 8  | 9  | 3 | 7  | 5163.9368 | 0.007  | 0.020 |
| 200 | 13 | 2 | 11 | 12 | 3 | 9  | 5166.6733 | 0.018  | 0.020 |
| 201 | 10 | 4 | 7  | 9  | 4 | 6  | 5169.9325 | -0.002 | 0.020 |
| 202 | 10 | 4 | 6  | 9  | 4 | 5  | 5175.4547 | -0.001 | 0.020 |
| 203 | 11 | 1 | 10 | 10 | 2 | 9  | 5196.1640 | -0.001 | 0.020 |
| 204 | 10 | 1 | 9  | 9  | 1 | 8  | 5199.1673 | 0.001  | 0.020 |
| 205 | 4  | 4 | 1  | 3  | 3 | 0  | 5213.9321 | 0.058  | 0.020 |
| 206 | 4  | 4 | 0  | 3  | 3 | 0  | 5213.9321 | 0.054  | 0.020 |
| 207 | 4  | 4 | 1  | 3  | 3 | 1  | 5213.9321 | -0.043 | 0.020 |
| 208 | 4  | 4 | 0  | 3  | 3 | 1  | 5213.9321 | -0.047 | 0.020 |
| 209 | 10 | 3 | 7  | 9  | 3 | 6  | 5231.3539 | -0.001 | 0.020 |
| 210 | 6  | 3 | 3  | 5  | 2 | 3  | 5296.3353 | -0.014 | 0.020 |
| 211 | 9  | 2 | 8  | 8  | 1 | 7  | 5312.8774 | 0.001  | 0.020 |
| 212 | 10 | 2 | 8  | 9  | 2 | 7  | 5315.2069 | 0.005  | 0.020 |
| 213 | 11 | 0 | 11 | 10 | 1 | 10 | 5332.1219 | 0.018  | 0.020 |
| 214 | 7  | 2 | 6  | 6  | 1 | 6  | 5354.1510 | 0.008  | 0.020 |
| 215 | 11 | 1 | 11 | 10 | 1 | 10 | 5357.2339 | -0.003 | 0.020 |
| 216 | 8  | 2 | 6  | 7  | 1 | 6  | 5366.7590 | -0.004 | 0.020 |

|     |    |    |    |    |    |    |           |        |       |
|-----|----|----|----|----|----|----|-----------|--------|-------|
| 217 | 11 | 0  | 11 | 10 | 0  | 10 | 5370.8972 | 0.006  | 0.020 |
| 218 | 6  | 3  | 4  | 5  | 2  | 4  | 5371.8790 | 0.002  | 0.020 |
| 219 | 6  | 3  | 3  | 5  | 2  | 4  | 5380.2364 | 0.019  | 0.020 |
| 220 | 15 | 3  | 12 | 14 | 4  | 10 | 5381.0566 | 0.006  | 0.020 |
| 221 | 8  | 1  | 7  | 7  | 0  | 7  | 5394.7422 | -0.003 | 0.020 |
| 222 | 11 | 1  | 11 | 10 | 0  | 10 | 5396.0353 | 0.012  | 0.020 |
| 223 | 11 | 2  | 10 | 10 | 2  | 9  | 5573.1560 | -0.003 | 0.020 |
| 224 | 11 | 9  | 2  | 10 | 9  | 1  | 5665.9026 | 0.008  | 0.020 |
| 225 | 11 | 9  | 3  | 10 | 9  | 2  | 5665.9026 | 0.008  | 0.020 |
| 226 | 11 | 8  | 3  | 10 | 8  | 2  | 5667.7419 | -0.011 | 0.020 |
| 227 | 11 | 8  | 4  | 10 | 8  | 3  | 5667.7419 | -0.011 | 0.020 |
| 228 | 11 | 7  | 5  | 10 | 7  | 4  | 5670.5047 | 0.006  | 0.020 |
| 229 | 11 | 7  | 4  | 10 | 7  | 3  | 5670.5047 | 0.005  | 0.020 |
| 230 | 14 | 2  | 12 | 13 | 3  | 10 | 5672.1167 | -0.001 | 0.020 |
| 231 | 11 | 6  | 6  | 10 | 6  | 5  | 5674.7922 | -0.010 | 0.020 |
| 232 | 11 | 6  | 5  | 10 | 6  | 4  | 5674.7922 | -0.022 | 0.020 |
| 233 | 11 | 3  | 9  | 10 | 3  | 8  | 5677.9361 | -0.007 | 0.020 |
| 234 | 11 | 5  | 7  | 10 | 5  | 6  | 5681.9230 | -0.013 | 0.020 |
| 235 | 11 | 1  | 10 | 10 | 1  | 9  | 5682.6232 | 0.014  | 0.020 |
| 236 | 11 | 4  | 8  | 10 | 4  | 7  | 5691.4204 | 0.044  | 0.020 |
| 237 | 11 | 4  | 7  | 10 | 4  | 6  | 5702.1950 | 0.031  | 0.020 |
| 238 | 7  | 3  | 4  | 6  | 2  | 4  | 5770.9641 | -0.009 | 0.020 |
| 239 | 11 | 3  | 8  | 10 | 3  | 7  | 5778.6457 | -0.017 | 0.020 |
| 240 | 12 | 0  | 12 | 11 | 1  | 11 | 5818.5157 | 0.000  | 0.020 |
| 241 | 12 | 1  | 12 | 11 | 1  | 11 | 5834.5591 | 0.007  | 0.020 |
| 242 | 12 | 7  | 6  | 12 | 6  | 6  | 5839.8674 | 0.023  | 0.020 |
| 243 | 12 | 7  | 5  | 12 | 6  | 6  | 5839.8674 | 0.022  | 0.020 |
| 244 | 12 | 0  | 12 | 11 | 0  | 11 | 5843.6492 | 0.001  | 0.020 |
| 245 | 11 | 7  | 5  | 11 | 6  | 5  | 5845.4755 | -0.002 | 0.020 |
| 246 | 11 | 7  | 4  | 11 | 6  | 5  | 5845.4755 | -0.002 | 0.020 |
| 247 | 11 | 7  | 5  | 11 | 6  | 6  | 5845.4755 | -0.020 | 0.020 |
| 248 | 11 | 7  | 4  | 11 | 6  | 6  | 5845.4755 | -0.020 | 0.020 |
| 249 | 11 | 2  | 9  | 10 | 2  | 8  | 5845.7777 | 0.015  | 0.020 |
| 250 | 9  | 7  | 2  | 9  | 6  | 3  | 5853.0329 | 0.010  | 0.020 |
| 251 | 9  | 7  | 3  | 9  | 6  | 3  | 5853.0329 | 0.010  | 0.020 |
| 252 | 9  | 7  | 2  | 9  | 6  | 4  | 5853.0329 | 0.009  | 0.020 |
| 253 | 9  | 7  | 3  | 9  | 6  | 4  | 5853.0329 | 0.009  | 0.020 |
| 254 | 12 | 1  | 12 | 11 | 0  | 11 | 5859.6816 | -0.002 | 0.020 |
| 255 | 7  | 3  | 5  | 6  | 2  | 5  | 5912.0568 | 0.013  | 0.020 |
| 256 | 7  | 3  | 4  | 6  | 2  | 5  | 5932.5975 | -0.028 | 0.020 |
| 257 | 9  | 2  | 7  | 8  | 1  | 7  | 5940.3741 | 0.019  | 0.020 |
| 258 | 8  | 2  | 7  | 7  | 1  | 7  | 6000.7671 | -0.002 | 0.020 |
| 259 | 11 | 2  | 10 | 10 | 1  | 9  | 6059.6079 | 0.004  | 0.020 |
| 260 | 12 | 2  | 11 | 11 | 2  | 10 | 6063.8006 | -0.001 | 0.020 |
| 261 | 9  | 1  | 8  | 8  | 0  | 8  | 6145.2264 | -0.011 | 0.020 |
| 262 | 12 | 1  | 11 | 11 | 1  | 10 | 6158.3546 | -0.002 | 0.020 |
| 263 | 12 | 11 | 1  | 11 | 11 | 0  | 6179.4246 | -0.006 | 0.020 |
| 264 | 12 | 11 | 2  | 11 | 11 | 1  | 6179.4246 | -0.006 | 0.020 |
| 265 | 12 | 10 | 2  | 11 | 10 | 1  | 6180.6764 | -0.006 | 0.020 |
| 266 | 12 | 10 | 3  | 11 | 10 | 2  | 6180.6764 | -0.006 | 0.020 |
| 267 | 12 | 9  | 3  | 11 | 9  | 2  | 6182.3890 | -0.004 | 0.020 |
| 268 | 12 | 9  | 4  | 11 | 9  | 3  | 6182.3890 | -0.004 | 0.020 |
| 269 | 12 | 8  | 4  | 11 | 8  | 3  | 6184.8140 | 0.003  | 0.020 |
| 270 | 12 | 8  | 5  | 11 | 8  | 4  | 6184.8140 | 0.003  | 0.020 |
| 271 | 8  | 3  | 6  | 7  | 2  | 5  | 6187.7064 | 0.002  | 0.020 |
| 272 | 12 | 7  | 6  | 11 | 7  | 5  | 6188.3837 | -0.001 | 0.020 |

|     |    |    |    |    |    |    |           |        |       |
|-----|----|----|----|----|----|----|-----------|--------|-------|
| 273 | 12 | 7  | 5  | 11 | 7  | 4  | 6188.3837 | -0.001 | 0.020 |
| 274 | 12 | 3  | 10 | 11 | 3  | 9  | 6189.5409 | -0.001 | 0.020 |
| 275 | 12 | 6  | 7  | 11 | 6  | 6  | 6194.0058 | 0.023  | 0.020 |
| 276 | 12 | 6  | 6  | 11 | 6  | 5  | 6194.0058 | -0.012 | 0.020 |
| 277 | 12 | 5  | 8  | 11 | 5  | 7  | 6203.0945 | -0.001 | 0.020 |
| 278 | 12 | 5  | 7  | 11 | 5  | 6  | 6204.2160 | 0.001  | 0.020 |
| 279 | 12 | 4  | 9  | 11 | 4  | 8  | 6213.1967 | -0.005 | 0.020 |
| 280 | 8  | 3  | 5  | 7  | 2  | 5  | 6232.0857 | -0.002 | 0.020 |
| 281 | 12 | 4  | 8  | 11 | 4  | 7  | 6232.7899 | -0.003 | 0.020 |
| 282 | 6  | 4  | 3  | 5  | 3  | 2  | 6240.9603 | -0.002 | 0.020 |
| 283 | 6  | 4  | 2  | 5  | 3  | 2  | 6241.1214 | 0.008  | 0.020 |
| 284 | 6  | 4  | 3  | 5  | 3  | 3  | 6243.7598 | -0.005 | 0.020 |
| 285 | 6  | 4  | 2  | 5  | 3  | 3  | 6243.7598 | -0.156 | 0.020 |
| 286 | 13 | 0  | 13 | 12 | 1  | 12 | 6301.0724 | 0.002  | 0.020 |
| 287 | 13 | 1  | 13 | 12 | 1  | 12 | 6311.1767 | 0.002  | 0.020 |
| 288 | 13 | 0  | 13 | 12 | 0  | 12 | 6317.1026 | -0.004 | 0.020 |
| 289 | 13 | 0  | 13 | 12 | 0  | 12 | 6317.1026 | -0.004 | 0.020 |
| 290 | 13 | 1  | 13 | 12 | 0  | 12 | 6327.2024 | -0.008 | 0.020 |
| 291 | 12 | 3  | 9  | 11 | 3  | 8  | 6329.9713 | -0.006 | 0.020 |
| 292 | 13 | 1  | 12 | 12 | 2  | 11 | 6346.3678 | -0.009 | 0.020 |
| 293 | 12 | 2  | 10 | 11 | 2  | 9  | 6368.8265 | 0.000  | 0.020 |
| 294 | 8  | 3  | 6  | 7  | 2  | 6  | 6464.0453 | 0.007  | 0.020 |
| 295 | 8  | 3  | 5  | 7  | 2  | 6  | 6508.4325 | 0.011  | 0.020 |
| 296 | 10 | 2  | 8  | 9  | 1  | 8  | 6548.9282 | -0.004 | 0.020 |
| 297 | 13 | 2  | 12 | 12 | 2  | 11 | 6551.4660 | -0.002 | 0.020 |
| 298 | 9  | 3  | 7  | 8  | 2  | 6  | 6598.5962 | -0.002 | 0.020 |
| 299 | 13 | 1  | 12 | 12 | 1  | 11 | 6628.8140 | -0.002 | 0.020 |
| 300 | 5  | 5  | 1  | 4  | 4  | 0  | 6630.0720 | 0.004  | 0.020 |
| 301 | 5  | 5  | 0  | 4  | 4  | 0  | 6630.0720 | 0.004  | 0.020 |
| 302 | 5  | 5  | 1  | 4  | 4  | 1  | 6630.0720 | 0.001  | 0.020 |
| 303 | 5  | 5  | 0  | 4  | 4  | 1  | 6630.0720 | 0.001  | 0.020 |
| 304 | 9  | 2  | 8  | 8  | 1  | 8  | 6664.6882 | 0.007  | 0.020 |
| 305 | 9  | 3  | 6  | 8  | 2  | 6  | 6684.8010 | 0.000  | 0.020 |
| 306 | 13 | 11 | 2  | 12 | 11 | 1  | 6695.5023 | 0.017  | 0.020 |
| 307 | 13 | 11 | 3  | 12 | 11 | 2  | 6695.5023 | 0.017  | 0.020 |
| 308 | 13 | 10 | 3  | 12 | 10 | 2  | 6697.0774 | -0.005 | 0.020 |
| 309 | 13 | 10 | 4  | 12 | 10 | 3  | 6697.0774 | -0.005 | 0.020 |
| 310 | 13 | 3  | 11 | 12 | 3  | 10 | 6698.2479 | 0.000  | 0.020 |
| 311 | 13 | 9  | 4  | 12 | 9  | 3  | 6699.2730 | 0.011  | 0.020 |
| 312 | 13 | 9  | 5  | 12 | 9  | 4  | 6699.2730 | 0.011  | 0.020 |
| 313 | 13 | 8  | 5  | 12 | 8  | 4  | 6702.3394 | -0.004 | 0.020 |
| 314 | 13 | 8  | 6  | 12 | 8  | 5  | 6702.3394 | -0.004 | 0.020 |
| 315 | 13 | 7  | 7  | 12 | 7  | 6  | 6706.9013 | 0.003  | 0.020 |
| 316 | 13 | 7  | 6  | 12 | 7  | 5  | 6706.9013 | 0.001  | 0.020 |
| 317 | 13 | 6  | 8  | 12 | 6  | 7  | 6714.0738 | 0.046  | 0.020 |
| 318 | 13 | 6  | 7  | 12 | 6  | 6  | 6714.0738 | -0.044 | 0.020 |
| 319 | 13 | 5  | 9  | 12 | 5  | 8  | 6725.3116 | -0.001 | 0.020 |
| 320 | 13 | 5  | 8  | 12 | 5  | 7  | 6727.6504 | -0.004 | 0.020 |
| 321 | 15 | 8  | 8  | 15 | 7  | 8  | 6731.0787 | 0.021  | 0.020 |
| 322 | 15 | 8  | 7  | 15 | 7  | 8  | 6731.0787 | 0.021  | 0.020 |
| 323 | 15 | 8  | 8  | 15 | 7  | 9  | 6731.0787 | -0.003 | 0.020 |
| 324 | 15 | 8  | 7  | 15 | 7  | 9  | 6731.0787 | -0.004 | 0.020 |
| 325 | 13 | 4  | 10 | 12 | 4  | 9  | 6734.9746 | 0.002  | 0.020 |
| 326 | 14 | 8  | 7  | 14 | 7  | 7  | 6738.1260 | 0.010  | 0.020 |
| 327 | 14 | 8  | 6  | 14 | 7  | 7  | 6738.1260 | 0.010  | 0.020 |
| 328 | 14 | 8  | 7  | 14 | 7  | 8  | 6738.1260 | 0.001  | 0.020 |



|     |    |    |    |    |    |    |           |        |       |
|-----|----|----|----|----|----|----|-----------|--------|-------|
| 329 | 14 | 8  | 6  | 14 | 7  | 8  | 6738.1260 | 0.001  | 0.020 |
| 330 | 13 | 8  | 5  | 13 | 7  | 6  | 6743.8271 | -0.001 | 0.020 |
| 331 | 13 | 8  | 6  | 13 | 7  | 6  | 6743.8271 | -0.001 | 0.020 |
| 332 | 13 | 8  | 5  | 13 | 7  | 7  | 6743.8271 | -0.004 | 0.020 |
| 333 | 13 | 8  | 6  | 13 | 7  | 7  | 6743.8271 | -0.004 | 0.020 |
| 334 | 12 | 8  | 4  | 12 | 7  | 5  | 6748.3865 | 0.001  | 0.020 |
| 335 | 12 | 8  | 5  | 12 | 7  | 5  | 6748.3865 | 0.001  | 0.020 |
| 336 | 12 | 8  | 4  | 12 | 7  | 6  | 6748.3865 | 0.000  | 0.020 |
| 337 | 12 | 8  | 5  | 12 | 7  | 6  | 6748.3865 | 0.000  | 0.020 |
| 338 | 7  | 4  | 4  | 6  | 3  | 3  | 6750.6614 | 0.007  | 0.020 |
| 339 | 7  | 4  | 3  | 6  | 3  | 3  | 6751.1924 | -0.014 | 0.020 |
| 340 | 11 | 8  | 3  | 11 | 7  | 4  | 6751.9603 | 0.001  | 0.020 |
| 341 | 11 | 8  | 4  | 11 | 7  | 4  | 6751.9603 | 0.001  | 0.020 |
| 342 | 11 | 8  | 3  | 11 | 7  | 5  | 6751.9603 | 0.001  | 0.020 |
| 343 | 11 | 8  | 4  | 11 | 7  | 5  | 6751.9603 | 0.001  | 0.020 |
| 344 | 10 | 8  | 2  | 10 | 7  | 3  | 6754.6929 | -0.013 | 0.020 |
| 345 | 10 | 8  | 2  | 10 | 7  | 4  | 6754.6929 | -0.013 | 0.020 |
| 346 | 10 | 8  | 3  | 10 | 7  | 3  | 6754.6929 | -0.013 | 0.020 |
| 347 | 10 | 8  | 3  | 10 | 7  | 4  | 6754.6929 | -0.013 | 0.020 |
| 348 | 10 | 8  | 3  | 10 | 7  | 4  | 6754.6929 | -0.013 | 0.020 |
| 349 | 9  | 8  | 1  | 9  | 7  | 2  | 6756.7422 | -0.022 | 0.020 |
| 350 | 9  | 8  | 1  | 9  | 7  | 3  | 6756.7422 | -0.022 | 0.020 |
| 351 | 9  | 8  | 2  | 9  | 7  | 2  | 6756.7422 | -0.022 | 0.020 |
| 352 | 9  | 8  | 2  | 9  | 7  | 3  | 6756.7422 | -0.022 | 0.020 |
| 353 | 7  | 4  | 4  | 6  | 3  | 4  | 6758.9921 | -0.003 | 0.020 |
| 354 | 7  | 4  | 3  | 6  | 3  | 4  | 6759.5476 | 0.001  | 0.020 |
| 355 | 13 | 4  | 9  | 12 | 4  | 8  | 6768.3299 | -0.005 | 0.020 |
| 356 | 14 | 0  | 14 | 13 | 1  | 13 | 6781.0078 | 0.001  | 0.020 |
| 357 | 14 | 1  | 14 | 13 | 1  | 13 | 6787.3046 | -0.002 | 0.020 |
| 358 | 14 | 0  | 14 | 13 | 0  | 13 | 6791.1110 | 0.000  | 0.020 |
| 359 | 14 | 1  | 14 | 13 | 0  | 13 | 6797.4191 | 0.008  | 0.020 |
| 360 | 13 | 3  | 10 | 12 | 3  | 9  | 6882.3878 | -0.003 | 0.020 |
| 361 | 13 | 2  | 11 | 12 | 2  | 10 | 6883.2076 | -0.001 | 0.020 |
| 362 | 14 | 1  | 13 | 13 | 2  | 12 | 6891.5546 | 0.006  | 0.020 |
| 363 | 10 | 1  | 9  | 9  | 0  | 9  | 6916.8452 | 0.000  | 0.020 |
| 364 | 10 | 3  | 8  | 9  | 2  | 7  | 6984.0610 | -0.015 | 0.020 |
| 365 | 9  | 3  | 7  | 8  | 2  | 7  | 7029.9606 | 0.002  | 0.020 |
| 366 | 14 | 2  | 13 | 13 | 2  | 12 | 7036.4456 | 0.004  | 0.020 |
| 367 | 14 | 1  | 13 | 13 | 1  | 12 | 7096.6404 | 0.000  | 0.020 |
| 368 | 10 | 3  | 7  | 9  | 2  | 7  | 7137.7086 | 0.005  | 0.020 |
| 369 | 6  | 5  | 2  | 5  | 4  | 1  | 7144.7976 | 0.014  | 0.020 |
| 370 | 6  | 5  | 1  | 5  | 4  | 1  | 7144.7976 | 0.013  | 0.020 |
| 371 | 6  | 5  | 2  | 5  | 4  | 2  | 7144.7976 | -0.016 | 0.020 |
| 372 | 6  | 5  | 1  | 5  | 4  | 2  | 7144.7976 | -0.017 | 0.020 |
| 373 | 11 | 2  | 9  | 10 | 1  | 9  | 7195.5240 | -0.005 | 0.020 |
| 374 | 14 | 3  | 12 | 13 | 3  | 11 | 7203.6813 | -0.004 | 0.020 |
| 375 | 14 | 12 | 2  | 13 | 12 | 1  | 7210.2784 | -0.021 | 0.020 |
| 376 | 14 | 12 | 3  | 13 | 12 | 2  | 7210.2784 | -0.021 | 0.020 |
| 377 | 14 | 11 | 3  | 13 | 11 | 2  | 7211.8049 | -0.001 | 0.020 |
| 378 | 14 | 11 | 4  | 13 | 11 | 3  | 7211.8049 | -0.001 | 0.020 |
| 379 | 14 | 10 | 4  | 13 | 10 | 3  | 7213.8067 | 0.001  | 0.020 |
| 380 | 14 | 10 | 5  | 13 | 10 | 4  | 7213.8067 | 0.001  | 0.020 |
| 381 | 14 | 9  | 5  | 13 | 9  | 4  | 7216.5367 | 0.003  | 0.020 |
| 382 | 14 | 9  | 6  | 13 | 9  | 5  | 7216.5367 | 0.003  | 0.020 |
| 383 | 14 | 8  | 7  | 13 | 8  | 6  | 7220.3943 | 0.004  | 0.020 |
| 384 | 14 | 8  | 6  | 13 | 8  | 5  | 7220.3943 | 0.004  | 0.020 |

|     |    |    |    |    |    |    |           |        |       |
|-----|----|----|----|----|----|----|-----------|--------|-------|
| 385 | 14 | 7  | 8  | 13 | 7  | 7  | 7226.0930 | -0.004 | 0.020 |
| 386 | 14 | 7  | 7  | 13 | 7  | 6  | 7226.0930 | -0.010 | 0.020 |
| 387 | 14 | 6  | 9  | 13 | 6  | 8  | 7235.0053 | -0.003 | 0.020 |
| 388 | 14 | 6  | 8  | 13 | 6  | 7  | 7235.2088 | -0.010 | 0.020 |
| 389 | 14 | 2  | 13 | 13 | 1  | 12 | 7241.5475 | 0.013  | 0.020 |
| 390 | 14 | 5  | 10 | 13 | 5  | 9  | 7248.5438 | 0.000  | 0.020 |
| 391 | 14 | 5  | 9  | 13 | 5  | 8  | 7253.1262 | -0.005 | 0.020 |
| 392 | 8  | 4  | 5  | 7  | 3  | 4  | 7254.6030 | -0.008 | 0.020 |
| 393 | 14 | 4  | 11 | 13 | 4  | 10 | 7256.1560 | 0.003  | 0.020 |
| 394 | 8  | 4  | 4  | 7  | 3  | 4  | 7256.2622 | 0.007  | 0.020 |
| 395 | 15 | 0  | 15 | 14 | 1  | 14 | 7259.2103 | 0.001  | 0.020 |
| 396 | 15 | 1  | 15 | 14 | 1  | 14 | 7263.0950 | -0.008 | 0.020 |
| 397 | 15 | 0  | 15 | 14 | 0  | 14 | 7265.5108 | 0.002  | 0.020 |
| 398 | 15 | 1  | 15 | 14 | 0  | 14 | 7269.3970 | -0.006 | 0.020 |
| 399 | 8  | 4  | 5  | 7  | 3  | 5  | 7275.1967 | 0.004  | 0.020 |
| 400 | 8  | 4  | 4  | 7  | 3  | 5  | 7276.8257 | -0.011 | 0.020 |
| 401 | 14 | 4  | 10 | 13 | 4  | 9  | 7309.7102 | -0.001 | 0.020 |
| 402 | 10 | 2  | 9  | 9  | 1  | 9  | 7344.5693 | 0.006  | 0.020 |
| 403 | 11 | 3  | 9  | 10 | 2  | 8  | 7346.8138 | -0.004 | 0.020 |
| 404 | 14 | 2  | 12 | 13 | 2  | 11 | 7387.8580 | 0.005  | 0.020 |
| 405 | 15 | 1  | 14 | 14 | 2  | 13 | 7419.0647 | -0.009 | 0.020 |
| 406 | 14 | 3  | 11 | 13 | 3  | 10 | 7432.6496 | -0.004 | 0.020 |
| 407 | 15 | 2  | 14 | 14 | 2  | 13 | 7519.0726 | -0.003 | 0.020 |
| 408 | 15 | 1  | 14 | 14 | 1  | 13 | 7563.9721 | 0.006  | 0.020 |
| 409 | 11 | 3  | 8  | 10 | 2  | 8  | 7601.1667 | 0.001  | 0.020 |
| 410 | 10 | 3  | 8  | 9  | 2  | 8  | 7611.5574 | 0.003  | 0.020 |
| 411 | 11 | 9  | 2  | 11 | 8  | 3  | 7656.2201 | 0.011  | 0.020 |
| 412 | 11 | 9  | 2  | 11 | 8  | 4  | 7656.2201 | 0.011  | 0.020 |
| 413 | 11 | 9  | 3  | 11 | 8  | 3  | 7656.2201 | 0.011  | 0.020 |
| 414 | 11 | 9  | 3  | 11 | 8  | 4  | 7656.2201 | 0.011  | 0.020 |
| 415 | 7  | 5  | 3  | 6  | 4  | 3  | 7659.2351 | -0.037 | 0.020 |
| 416 | 7  | 5  | 2  | 6  | 4  | 3  | 7659.2351 | -0.044 | 0.020 |
| 417 | 15 | 3  | 13 | 14 | 3  | 12 | 7705.6008 | -0.006 | 0.020 |
| 418 | 15 | 11 | 4  | 14 | 11 | 3  | 7728.4245 | 0.013  | 0.020 |
| 419 | 15 | 11 | 5  | 14 | 11 | 4  | 7728.4245 | 0.013  | 0.020 |
| 420 | 15 | 10 | 5  | 14 | 10 | 4  | 7730.8727 | -0.004 | 0.020 |
| 421 | 15 | 10 | 6  | 14 | 10 | 5  | 7730.8727 | -0.004 | 0.020 |
| 422 | 15 | 9  | 6  | 14 | 9  | 5  | 7734.2464 | 0.007  | 0.020 |
| 423 | 15 | 9  | 7  | 14 | 9  | 6  | 7734.2464 | 0.007  | 0.020 |
| 424 | 15 | 8  | 8  | 14 | 8  | 7  | 7738.9901 | -0.005 | 0.020 |
| 425 | 15 | 8  | 7  | 14 | 8  | 6  | 7738.9901 | -0.006 | 0.020 |
| 426 | 15 | 7  | 9  | 14 | 7  | 8  | 7746.0394 | 0.002  | 0.020 |
| 427 | 15 | 7  | 8  | 14 | 7  | 7  | 7746.0394 | -0.014 | 0.020 |
| 428 | 9  | 4  | 6  | 8  | 3  | 5  | 7749.0685 | 0.000  | 0.020 |
| 429 | 9  | 4  | 5  | 8  | 3  | 5  | 7753.3062 | 0.001  | 0.020 |
| 430 | 15 | 6  | 10 | 14 | 6  | 9  | 7756.9899 | 0.004  | 0.020 |
| 431 | 15 | 6  | 9  | 14 | 6  | 8  | 7757.4439 | -0.004 | 0.020 |
| 432 | 15 | 5  | 11 | 14 | 5  | 10 | 7772.6574 | -0.010 | 0.020 |
| 433 | 15 | 4  | 12 | 14 | 4  | 11 | 7776.1509 | 0.007  | 0.020 |
| 434 | 15 | 5  | 10 | 14 | 5  | 9  | 7781.1594 | 0.003  | 0.020 |
| 435 | 9  | 4  | 6  | 8  | 3  | 6  | 7793.4576 | 0.006  | 0.020 |
| 436 | 15 | 4  | 11 | 14 | 4  | 10 | 7857.4277 | -0.004 | 0.020 |
| 437 | 15 | 2  | 13 | 14 | 2  | 12 | 7882.0949 | 0.002  | 0.020 |
| 438 | 15 | 3  | 12 | 14 | 3  | 11 | 7977.8984 | 0.002  | 0.020 |

**Table S6.** Observed rotational transitions of isomer II (Gg $\pi$ +Gg $\pi$ -Lp+) of 2-phenylethanol dimer (Freq.), together with the differences with the calculated transitions (o.-c.) for the fit of Table 1 and estimated frequency uncertainties (unc.). All values in MHz.

| <i>N</i> | <i>J'</i> | <i>K<sub>-1</sub>'</i> | <i>K<sub>+1</sub>'</i> | <i>J''</i> | <i>K<sub>-1</sub>''</i> | <i>K<sub>+1</sub>''</i> | <i>Freq.</i> /MHz | <i>o-c</i> /MHz | <i>unc.</i> /MHz |
|----------|-----------|------------------------|------------------------|------------|-------------------------|-------------------------|-------------------|-----------------|------------------|
| 1        | 4         | 0                      | 4                      | 3          | 1                       | 3                       | 2188.4971         | 0.005           | 0.020            |
| 2        | 4         | 1                      | 4                      | 3          | 0                       | 3                       | 2534.9139         | -0.0045         | 0.020            |
| 3        | 3         | 2                      | 1                      | 2          | 1                       | 2                       | 2639.0969         | -0.0028         | 0.020            |
| 4        | 4         | 1                      | 3                      | 3          | 0                       | 3                       | 2800.5235         | -0.0085         | 0.020            |
| 5        | 5         | 0                      | 5                      | 4          | 1                       | 4                       | 2808.2339         | 0.0081          | 0.020            |
| 6        | 7         | 6                      | 1                      | 7          | 5                       | 2                       | 2887.3423         | 0.0142          | 0.020            |
| 7        | 7         | 6                      | 2                      | 7          | 5                       | 2                       | 2887.3423         | 0.0142          | 0.020            |
| 8        | 7         | 6                      | 2                      | 7          | 5                       | 3                       | 2887.3423         | 0.0054          | 0.020            |
| 9        | 7         | 6                      | 1                      | 7          | 5                       | 3                       | 2887.3423         | 0.0053          | 0.020            |
| 10       | 6         | 6                      | 0                      | 6          | 5                       | 1                       | 2888.8591         | 0.0098          | 0.020            |
| 11       | 6         | 6                      | 1                      | 6          | 5                       | 1                       | 2888.8591         | 0.0098          | 0.020            |
| 12       | 6         | 6                      | 1                      | 6          | 5                       | 2                       | 2888.8591         | 0.0083          | 0.020            |
| 13       | 6         | 6                      | 0                      | 6          | 5                       | 2                       | 2888.8591         | 0.0083          | 0.020            |
| 14       | 5         | 1                      | 5                      | 4          | 1                       | 4                       | 2925.4830         | -0.0251         | 0.020            |
| 15       | 5         | 0                      | 5                      | 4          | 0                       | 4                       | 2962.6921         | 0.0051          | 0.020            |
| 16       | 6         | 1                      | 5                      | 5          | 2                       | 3                       | 2995.2486         | -0.0006         | 0.020            |
| 17       | 5         | 2                      | 4                      | 4          | 2                       | 3                       | 2995.4900         | 0.0128          | 0.020            |
| 18       | 5         | 1                      | 5                      | 4          | 0                       | 4                       | 3079.9652         | -0.0042         | 0.020            |
| 19       | 4         | 2                      | 3                      | 3          | 1                       | 2                       | 3108.9862         | -0.0041         | 0.020            |
| 20       | 3         | 3                      | 1                      | 2          | 2                       | 0                       | 3114.4658         | 0.0158          | 0.020            |
| 21       | 3         | 3                      | 1                      | 2          | 2                       | 1                       | 3116.4686         | 0.0008          | 0.020            |
| 22       | 3         | 3                      | 0                      | 2          | 2                       | 1                       | 3116.5610         | -0.0026         | 0.020            |
| 23       | 4         | 2                      | 2                      | 3          | 1                       | 2                       | 3138.5050         | -0.0102         | 0.020            |
| 24       | 4         | 2                      | 3                      | 3          | 1                       | 3                       | 3268.6681         | 0.004           | 0.020            |
| 25       | 10        | 7                      | 4                      | 10         | 6                       | 4                       | 3408.4852         | 0.0113          | 0.020            |
| 26       | 10        | 7                      | 3                      | 10         | 6                       | 4                       | 3408.4852         | 0.0112          | 0.020            |
| 27       | 10        | 7                      | 4                      | 10         | 6                       | 4                       | 3408.4852         | 0.0113          | 0.020            |
| 28       | 10        | 7                      | 3                      | 10         | 6                       | 4                       | 3408.4852         | 0.0112          | 0.020            |
| 29       | 10        | 7                      | 4                      | 10         | 6                       | 5                       | 3408.4852         | 0.0032          | 0.020            |
| 30       | 10        | 7                      | 3                      | 10         | 6                       | 5                       | 3408.4852         | 0.0031          | 0.020            |
| 31       | 9         | 7                      | 3                      | 9          | 6                       | 3                       | 3411.1002         | 0.0006          | 0.020            |
| 32       | 9         | 7                      | 2                      | 9          | 6                       | 3                       | 3411.1002         | 0.0006          | 0.020            |
| 33       | 9         | 7                      | 2                      | 9          | 6                       | 4                       | 3411.1002         | -0.0014         | 0.020            |
| 34       | 9         | 7                      | 3                      | 9          | 6                       | 4                       | 3411.1002         | -0.0014         | 0.020            |
| 35       | 8         | 7                      | 2                      | 8          | 6                       | 2                       | 3413.0101         | 0.0022          | 0.020            |
| 36       | 8         | 7                      | 1                      | 8          | 6                       | 2                       | 3413.0101         | 0.0022          | 0.020            |
| 37       | 8         | 7                      | 2                      | 8          | 6                       | 3                       | 3413.0101         | 0.0018          | 0.020            |
| 38       | 8         | 7                      | 1                      | 8          | 6                       | 3                       | 3413.0101         | 0.0018          | 0.020            |
| 39       | 7         | 7                      | 1                      | 7          | 6                       | 2                       | 3414.3433         | -0.0024         | 0.020            |
| 40       | 7         | 7                      | 1                      | 7          | 6                       | 1                       | 3414.3433         | -0.0024         | 0.020            |
| 41       | 7         | 7                      | 0                      | 7          | 6                       | 1                       | 3414.3433         | -0.0024         | 0.020            |
| 42       | 7         | 7                      | 0                      | 7          | 6                       | 2                       | 3414.3433         | -0.0024         | 0.020            |
| 43       | 6         | 0                      | 6                      | 5          | 1                       | 5                       | 3422.0309         | -0.0059         | 0.020            |
| 44       | 5         | 1                      | 4                      | 4          | 0                       | 4                       | 3476.7207         | -0.0132         | 0.020            |
| 45       | 6         | 1                      | 6                      | 5          | 1                       | 5                       | 3506.3891         | -0.0034         | 0.020            |
| 46       | 6         | 0                      | 6                      | 5          | 0                       | 5                       | 3539.3210         | 0.0017          | 0.020            |
| 47       | 6         | 2                      | 5                      | 5          | 2                       | 4                       | 3590.8890         | -0.0072         | 0.020            |
| 48       | 7         | 1                      | 6                      | 6          | 2                       | 4                       | 3604.4500         | 0.018           | 0.020            |

|     |    |   |   |    |   |   |           |         |       |
|-----|----|---|---|----|---|---|-----------|---------|-------|
| 49  | 6  | 3 | 4 | 5  | 3 | 3 | 3608.5480 | 0.0034  | 0.020 |
| 50  | 6  | 3 | 3 | 5  | 3 | 2 | 3613.8006 | 0.0263  | 0.020 |
| 51  | 6  | 1 | 6 | 5  | 0 | 5 | 3623.6720 | -0.003  | 0.020 |
| 52  | 6  | 2 | 4 | 5  | 2 | 3 | 3651.3813 | -0.0002 | 0.020 |
| 53  | 6  | 1 | 5 | 5  | 1 | 4 | 3660.9223 | -0.0088 | 0.020 |
| 54  | 4  | 3 | 2 | 3  | 2 | 1 | 3710.2166 | 0.0087  | 0.020 |
| 55  | 4  | 3 | 1 | 3  | 2 | 1 | 3710.8794 | 0.0023  | 0.020 |
| 56  | 4  | 3 | 2 | 3  | 2 | 2 | 3720.2290 | 0.0082  | 0.020 |
| 57  | 4  | 3 | 1 | 3  | 2 | 2 | 3720.8927 | 0.0027  | 0.020 |
| 58  | 5  | 2 | 3 | 4  | 1 | 3 | 3722.3353 | -0.0057 | 0.020 |
| 59  | 7  | 1 | 6 | 6  | 2 | 5 | 3731.6825 | -0.0015 | 0.020 |
| 60  | 5  | 2 | 4 | 4  | 1 | 4 | 3921.1830 | -0.0049 | 0.020 |
| 61  | 13 | 8 | 6 | 13 | 7 | 6 | 3928.0839 | 0.0162  | 0.020 |
| 62  | 13 | 8 | 5 | 13 | 7 | 6 | 3928.0839 | 0.0161  | 0.020 |
| 63  | 13 | 8 | 6 | 13 | 7 | 7 | 3928.0839 | 0.0107  | 0.020 |
| 64  | 13 | 8 | 5 | 13 | 7 | 7 | 3928.0839 | 0.0106  | 0.020 |
| 65  | 12 | 8 | 5 | 12 | 7 | 5 | 3931.7673 | -0.0092 | 0.020 |
| 66  | 12 | 8 | 4 | 12 | 7 | 5 | 3931.7673 | -0.0093 | 0.020 |
| 67  | 12 | 8 | 5 | 12 | 7 | 6 | 3931.7673 | -0.0109 | 0.020 |
| 68  | 12 | 8 | 4 | 12 | 7 | 6 | 3931.7673 | -0.0109 | 0.020 |
| 69  | 11 | 8 | 4 | 11 | 7 | 4 | 3934.6752 | -0.0088 | 0.020 |
| 70  | 11 | 8 | 3 | 11 | 7 | 4 | 3934.6752 | -0.0088 | 0.020 |
| 71  | 11 | 8 | 4 | 11 | 7 | 5 | 3934.6752 | -0.0092 | 0.020 |
| 72  | 11 | 8 | 3 | 11 | 7 | 5 | 3934.6752 | -0.0092 | 0.020 |
| 73  | 5  | 2 | 3 | 4  | 1 | 4 | 3987.9430 | -0.0116 | 0.020 |
| 74  | 7  | 0 | 7 | 6  | 1 | 6 | 4027.7499 | -0.0121 | 0.020 |
| 75  | 7  | 1 | 7 | 6  | 1 | 6 | 4085.6591 | 0.0093  | 0.020 |
| 76  | 7  | 1 | 7 | 6  | 0 | 6 | 4169.9985 | -0.007  | 0.020 |
| 77  | 10 | 3 | 8 | 9  | 4 | 5 | 4174.9646 | 0.0746  | 0.020 |
| 78  | 6  | 1 | 5 | 5  | 0 | 5 | 4174.9646 | -0.0135 | 0.020 |
| 79  | 6  | 2 | 5 | 5  | 1 | 4 | 4189.8229 | 0.0113  | 0.020 |
| 80  | 4  | 4 | 1 | 3  | 3 | 0 | 4241.5900 | -0.0155 | 0.020 |
| 81  | 4  | 4 | 0 | 3  | 3 | 0 | 4241.5900 | -0.0193 | 0.020 |
| 82  | 4  | 4 | 1 | 3  | 3 | 1 | 4241.6975 | -0.0039 | 0.020 |
| 83  | 4  | 4 | 0 | 3  | 3 | 1 | 4241.6975 | -0.0077 | 0.020 |
| 84  | 7  | 1 | 6 | 6  | 1 | 5 | 4260.5570 | -0.0073 | 0.020 |
| 85  | 7  | 2 | 5 | 6  | 2 | 4 | 4271.7251 | 0.0007  | 0.020 |
| 86  | 5  | 3 | 3 | 4  | 2 | 2 | 4298.2416 | 0.0047  | 0.020 |
| 87  | 5  | 3 | 2 | 4  | 2 | 2 | 4300.8901 | -0.006  | 0.020 |
| 88  | 6  | 2 | 4 | 5  | 1 | 4 | 4317.0553 | -0.0081 | 0.020 |
| 89  | 10 | 3 | 7 | 9  | 4 | 6 | 4318.9528 | 0.0196  | 0.020 |
| 90  | 5  | 3 | 3 | 4  | 2 | 3 | 4327.7680 | 0.0063  | 0.020 |
| 91  | 5  | 3 | 2 | 4  | 2 | 3 | 4330.4074 | -0.0136 | 0.020 |
| 92  | 8  | 1 | 7 | 7  | 2 | 6 | 4401.6852 | -0.004  | 0.020 |
| 93  | 15 | 9 | 7 | 15 | 8 | 7 | 4451.1285 | 0.0102  | 0.020 |
| 94  | 15 | 9 | 6 | 15 | 8 | 7 | 4451.1285 | 0.0102  | 0.020 |
| 95  | 15 | 9 | 7 | 15 | 8 | 8 | 4451.1285 | 0.0091  | 0.020 |
| 96  | 15 | 9 | 6 | 15 | 8 | 8 | 4451.1285 | 0.0091  | 0.020 |
| 97  | 14 | 9 | 6 | 14 | 8 | 6 | 4454.9913 | -0.0006 | 0.020 |
| 98  | 14 | 9 | 5 | 14 | 8 | 6 | 4454.9913 | -0.0006 | 0.020 |
| 99  | 14 | 9 | 6 | 14 | 8 | 7 | 4454.9913 | -0.001  | 0.020 |
| 100 | 14 | 9 | 5 | 14 | 8 | 7 | 4454.9913 | -0.001  | 0.020 |
| 101 | 13 | 9 | 5 | 13 | 8 | 5 | 4458.1240 | -0.0087 | 0.020 |
| 102 | 13 | 9 | 4 | 13 | 8 | 5 | 4458.1240 | -0.0087 | 0.020 |
| 103 | 13 | 9 | 5 | 13 | 8 | 6 | 4458.1240 | -0.0087 | 0.020 |
| 104 | 13 | 9 | 4 | 13 | 8 | 6 | 4458.1240 | -0.0087 | 0.020 |

|     |    |    |    |    |   |    |           |         |       |
|-----|----|----|----|----|---|----|-----------|---------|-------|
| 105 | 12 | 9  | 4  | 12 | 8 | 5  | 4460.6266 | -0.0155 | 0.020 |
| 106 | 12 | 9  | 4  | 12 | 8 | 4  | 4460.6266 | -0.0154 | 0.020 |
| 107 | 12 | 9  | 3  | 12 | 8 | 5  | 4460.6266 | -0.0155 | 0.020 |
| 108 | 12 | 9  | 3  | 12 | 8 | 4  | 4460.6266 | -0.0154 | 0.020 |
| 109 | 11 | 9  | 3  | 11 | 8 | 4  | 4462.6152 | 0.0026  | 0.020 |
| 110 | 11 | 9  | 3  | 11 | 8 | 3  | 4462.6152 | 0.0026  | 0.020 |
| 111 | 11 | 9  | 2  | 11 | 8 | 4  | 4462.6152 | 0.0026  | 0.020 |
| 112 | 11 | 9  | 2  | 11 | 8 | 3  | 4462.6152 | 0.0026  | 0.020 |
| 113 | 10 | 9  | 2  | 10 | 8 | 3  | 4464.1358 | 0.0072  | 0.020 |
| 114 | 10 | 9  | 2  | 10 | 8 | 2  | 4464.1358 | 0.0072  | 0.020 |
| 115 | 10 | 9  | 1  | 10 | 8 | 3  | 4464.1358 | 0.0072  | 0.020 |
| 116 | 10 | 9  | 1  | 10 | 8 | 2  | 4464.1358 | 0.0072  | 0.020 |
| 117 | 6  | 2  | 5  | 5  | 1 | 5  | 4586.5591 | -0.0169 | 0.020 |
| 118 | 8  | 0  | 8  | 7  | 1 | 7  | 4625.2131 | 0.0069  | 0.020 |
| 119 | 8  | 0  | 8  | 7  | 0 | 7  | 4683.0809 | -0.013  | 0.020 |
| 120 | 7  | 2  | 6  | 6  | 1 | 5  | 4713.2487 | -0.0064 | 0.020 |
| 121 | 8  | 1  | 8  | 7  | 0 | 7  | 4721.3239 | -0.0001 | 0.020 |
| 122 | 8  | 2  | 7  | 7  | 2 | 6  | 4775.7032 | 0.0251  | 0.020 |
| 123 | 6  | 3  | 4  | 5  | 2 | 3  | 4874.0494 | -0.0131 | 0.020 |
| 124 | 6  | 3  | 3  | 5  | 2 | 3  | 4881.9463 | -0.0052 | 0.020 |
| 125 | 7  | 2  | 5  | 6  | 1 | 5  | 4927.8632 | 0.0065  | 0.020 |
| 126 | 6  | 3  | 4  | 5  | 2 | 4  | 4940.8060 | -0.0231 | 0.020 |
| 127 | 6  | 3  | 3  | 5  | 2 | 4  | 4948.6887 | -0.0294 | 0.020 |
| 128 | 15 | 10 | 6  | 15 | 9 | 7  | 4981.4773 | -0.0017 | 0.020 |
| 129 | 15 | 10 | 6  | 15 | 9 | 6  | 4981.4773 | -0.0017 | 0.020 |
| 130 | 15 | 10 | 5  | 15 | 9 | 7  | 4981.4773 | -0.0017 | 0.020 |
| 131 | 15 | 10 | 5  | 15 | 9 | 6  | 4981.4773 | -0.0017 | 0.020 |
| 132 | 9  | 0  | 9  | 8  | 1 | 8  | 5215.4840 | 0.0004  | 0.020 |
| 133 | 8  | 2  | 7  | 7  | 1 | 6  | 5228.3896 | 0.0206  | 0.020 |
| 134 | 9  | 1  | 9  | 8  | 1 | 8  | 5239.9621 | -0.0181 | 0.020 |
| 135 | 9  | 0  | 9  | 8  | 0 | 8  | 5253.7000 | -0.0136 | 0.020 |
| 136 | 7  | 2  | 6  | 6  | 1 | 6  | 5264.5680 | 0.0097  | 0.020 |
| 137 | 9  | 1  | 9  | 8  | 0 | 8  | 5278.2090 | -0.0013 | 0.020 |
| 138 | 5  | 5  | 1  | 4  | 4 | 0  | 5367.7583 | 0.0009  | 0.020 |
| 139 | 5  | 5  | 0  | 4  | 4 | 0  | 5367.7583 | 0.0008  | 0.020 |
| 140 | 5  | 5  | 1  | 4  | 4 | 1  | 5367.7583 | -0.0028 | 0.020 |
| 141 | 5  | 5  | 0  | 4  | 4 | 1  | 5367.7583 | -0.0029 | 0.020 |
| 142 | 6  | 4  | 3  | 5  | 3 | 2  | 5440.5779 | 0.0162  | 0.020 |
| 143 | 6  | 4  | 2  | 5  | 3 | 2  | 5440.7403 | 0.0095  | 0.020 |
| 144 | 6  | 4  | 3  | 5  | 3 | 3  | 5443.2304 | 0.0093  | 0.020 |
| 145 | 6  | 4  | 2  | 5  | 3 | 3  | 5443.3745 | -0.0155 | 0.020 |
| 146 | 8  | 2  | 6  | 7  | 1 | 6  | 5558.5664 | 0.0235  | 0.020 |
| 147 | 7  | 3  | 5  | 6  | 2 | 5  | 5561.1743 | -0.0035 | 0.020 |
| 148 | 10 | 0  | 10 | 9  | 1 | 9  | 5800.2023 | -0.0023 | 0.020 |
| 149 | 8  | 3  | 5  | 7  | 2 | 5  | 6017.2546 | 0.0012  | 0.020 |
| 150 | 7  | 4  | 4  | 6  | 3 | 3  | 6036.5731 | -0.0038 | 0.020 |
| 151 | 7  | 4  | 3  | 6  | 3 | 3  | 6037.1995 | 0.0063  | 0.020 |
| 152 | 7  | 4  | 4  | 6  | 3 | 4  | 6044.4751 | 0.0089  | 0.020 |
| 153 | 7  | 4  | 3  | 6  | 3 | 4  | 6045.0775 | -0.0047 | 0.020 |
| 154 | 10 | 2  | 8  | 9  | 2 | 7  | 6120.2334 | 0.0229  | 0.020 |
| 155 | 8  | 3  | 6  | 7  | 2 | 6  | 6190.4419 | 0.0051  | 0.020 |
| 156 | 9  | 2  | 7  | 8  | 1 | 7  | 6212.0530 | -0.0095 | 0.020 |
| 157 | 8  | 3  | 5  | 7  | 2 | 6  | 6231.8515 | -0.0033 | 0.020 |
| 158 | 10 | 2  | 9  | 9  | 1 | 8  | 6248.3703 | 0.0206  | 0.020 |
| 159 | 11 | 0  | 11 | 10 | 1 | 10 | 6380.9199 | -0.0071 | 0.020 |
| 160 | 11 | 1  | 11 | 10 | 0 | 10 | 6405.6777 | 0.0022  | 0.020 |

|     |    |   |    |    |   |    |           |         |       |
|-----|----|---|----|----|---|----|-----------|---------|-------|
| 161 | 6  | 6 | 1  | 5  | 5 | 0  | 6493.8501 | 0.0024  | 0.020 |
| 162 | 6  | 6 | 0  | 5  | 5 | 0  | 6493.8501 | 0.0024  | 0.020 |
| 163 | 6  | 6 | 1  | 5  | 5 | 1  | 6493.8501 | 0.0023  | 0.020 |
| 164 | 6  | 6 | 0  | 5  | 5 | 1  | 6493.8501 | 0.0023  | 0.020 |
| 165 | 7  | 5 | 3  | 6  | 4 | 2  | 6568.4837 | -0.0001 | 0.020 |
| 166 | 7  | 5 | 2  | 6  | 4 | 2  | 6568.4837 | -0.0089 | 0.020 |
| 167 | 7  | 5 | 3  | 6  | 4 | 3  | 6568.6439 | -0.0089 | 0.020 |
| 168 | 7  | 5 | 2  | 6  | 4 | 3  | 6568.6439 | -0.0177 | 0.020 |
| 169 | 9  | 3 | 6  | 8  | 2 | 6  | 6579.3047 | 0.0053  | 0.020 |
| 170 | 8  | 4 | 5  | 7  | 3 | 4  | 6627.4201 | -0.0014 | 0.020 |
| 171 | 8  | 4 | 4  | 7  | 3 | 4  | 6629.2667 | 0.0133  | 0.020 |
| 172 | 8  | 4 | 5  | 7  | 3 | 5  | 6646.7892 | 0.0026  | 0.020 |
| 173 | 10 | 2 | 8  | 9  | 1 | 8  | 6890.7849 | -0.0104 | 0.020 |
| 174 | 12 | 0 | 12 | 11 | 1 | 11 | 6958.9110 | -0.0058 | 0.020 |
| 175 | 12 | 1 | 12 | 11 | 0 | 11 | 6974.0246 | -0.0093 | 0.020 |
| 176 | 7  | 6 | 2  | 6  | 5 | 1  | 7094.4291 | 0.0006  | 0.020 |
| 177 | 7  | 6 | 1  | 6  | 5 | 1  | 7094.4291 | 0.0006  | 0.020 |
| 178 | 7  | 6 | 2  | 6  | 5 | 2  | 7094.4291 | -0.0007 | 0.020 |
| 179 | 7  | 6 | 1  | 6  | 5 | 2  | 7094.4291 | -0.0008 | 0.020 |
| 180 | 9  | 4 | 6  | 8  | 3 | 5  | 7209.7864 | 0.0088  | 0.020 |
| 181 | 9  | 4 | 5  | 8  | 3 | 5  | 7214.4872 | 0.0079  | 0.020 |
| 182 | 9  | 4 | 6  | 8  | 3 | 6  | 7251.2008 | 0.005   | 0.020 |
| 183 | 9  | 4 | 5  | 8  | 3 | 6  | 7255.8901 | -0.0072 | 0.020 |
| 184 | 13 | 0 | 13 | 12 | 1 | 12 | 7535.0878 | -0.0193 | 0.020 |
| 185 | 7  | 7 | 1  | 6  | 6 | 1  | 7619.9319 | 0.007   | 0.020 |
| 186 | 7  | 7 | 1  | 6  | 6 | 0  | 7619.9319 | 0.007   | 0.020 |
| 187 | 7  | 7 | 0  | 6  | 6 | 1  | 7619.9319 | 0.007   | 0.020 |
| 188 | 7  | 7 | 0  | 6  | 6 | 0  | 7619.9319 | 0.007   | 0.020 |
| 189 | 8  | 6 | 3  | 7  | 5 | 2  | 7694.8502 | 0.0084  | 0.020 |
| 190 | 8  | 6 | 2  | 7  | 5 | 2  | 7694.8502 | 0.008   | 0.020 |
| 191 | 8  | 6 | 3  | 7  | 5 | 3  | 7694.8502 | -0.0004 | 0.020 |
| 192 | 8  | 6 | 2  | 7  | 5 | 3  | 7694.8502 | -0.0008 | 0.020 |
| 193 | 11 | 3 | 8  | 10 | 2 | 8  | 7727.4017 | 0.0131  | 0.020 |

**Table S7.** Observed rotational transitions of isomer III (Gg $\pi$ -Gg $\pi$ -Lp-) of 2-phenylethanol dimer (Freq.), together with the differences with the calculated transitions (o.-c.) for the fit of Table 1 and estimated frequency uncertainties (unc.). All values in MHz.

| <i>N</i> | <i>J'</i> | <i>K<sub>-1</sub>'</i> | <i>K<sub>+1</sub>'</i> | <i>J''</i> | <i>K<sub>-1</sub>''</i> | <i>K<sub>+1</sub>''</i> | <i>Freq. / MHz</i> | <i>o-c / MHz</i> | <i>unc. / MHz</i> |
|----------|-----------|------------------------|------------------------|------------|-------------------------|-------------------------|--------------------|------------------|-------------------|
| 1        | 4         | 2                      | 3                      | 3          | 2                       | 2                       | 2018.6258          | 0.004            | 0.020             |
| 2        | 4         | 3                      | 2                      | 3          | 3                       | 1                       | 2025.0296          | -0.016           | 0.020             |
| 3        | 4         | 3                      | 1                      | 3          | 3                       | 0                       | 2025.6107          | -0.001           | 0.020             |
| 4        | 4         | 2                      | 2                      | 3          | 2                       | 1                       | 2042.1599          | -0.005           | 0.020             |
| 5        | 4         | 1                      | 3                      | 3          | 1                       | 2                       | 2092.3765          | -0.004           | 0.020             |
| 6        | 7         | 3                      | 4                      | 7          | 2                       | 5                       | 2130.1272          | 0.008            | 0.020             |
| 7        | 5         | 0                      | 5                      | 4          | 1                       | 4                       | 2182.2857          | 0.013            | 0.020             |
| 8        | 6         | 3                      | 3                      | 6          | 2                       | 4                       | 2197.1225          | 0.017            | 0.020             |
| 9        | 5         | 3                      | 2                      | 5          | 2                       | 3                       | 2245.8077          | -0.002           | 0.020             |
| 10       | 4         | 3                      | 1                      | 4          | 2                       | 2                       | 2276.7029          | -0.005           | 0.020             |
| 11       | 4         | 1                      | 4                      | 3          | 0                       | 3                       | 2294.7191          | -0.001           | 0.020             |
| 12       | 4         | 3                      | 2                      | 4          | 2                       | 3                       | 2311.5676          | -0.009           | 0.020             |
| 13       | 6         | 3                      | 4                      | 6          | 2                       | 5                       | 2345.8448          | 0.010            | 0.020             |
| 14       | 2         | 2                      | 1                      | 1          | 1                       | 0                       | 2373.2200          | 0.001            | 0.020             |
| 15       | 2         | 2                      | 0                      | 1          | 1                       | 1                       | 2414.1229          | -0.004           | 0.020             |
| 16       | 5         | 1                      | 5                      | 4          | 1                       | 4                       | 2419.7717          | -0.005           | 0.020             |
| 17       | 5         | 0                      | 5                      | 4          | 0                       | 4                       | 2480.0363          | -0.005           | 0.020             |
| 18       | 10        | 2                      | 9                      | 10         | 1                       | 10                      | 2486.5613          | -0.012           | 0.020             |
| 19       | 9         | 3                      | 7                      | 9          | 2                       | 8                       | 2490.2456          | -0.006           | 0.020             |
| 20       | 5         | 2                      | 4                      | 4          | 2                       | 3                       | 2520.2709          | 0.004            | 0.020             |
| 21       | 5         | 4                      | 2                      | 4          | 4                       | 1                       | 2530.9688          | -0.004           | 0.020             |
| 22       | 5         | 4                      | 1                      | 4          | 4                       | 0                       | 2530.9688          | -0.029           | 0.020             |
| 23       | 5         | 3                      | 3                      | 4          | 3                       | 2                       | 2532.9540          | 0.001            | 0.020             |
| 24       | 5         | 3                      | 2                      | 4          | 3                       | 1                       | 2534.9148          | -0.007           | 0.020             |
| 25       | 5         | 2                      | 3                      | 4          | 2                       | 2                       | 2565.8154          | -0.004           | 0.020             |
| 26       | 10        | 3                      | 8                      | 10         | 2                       | 9                       | 2572.6288          | 0.005            | 0.020             |
| 27       | 5         | 1                      | 4                      | 4          | 1                       | 3                       | 2610.2997          | 0.000            | 0.020             |
| 28       | 5         | 1                      | 5                      | 4          | 0                       | 4                       | 2717.5378          | -0.008           | 0.020             |
| 29       | 6         | 0                      | 6                      | 5          | 1                       | 5                       | 2717.6531          | 0.001            | 0.020             |
| 30       | 3         | 2                      | 2                      | 2          | 1                       | 1                       | 2839.8483          | 0.004            | 0.020             |
| 31       | 6         | 1                      | 6                      | 5          | 1                       | 5                       | 2898.4515          | -0.001           | 0.020             |
| 32       | 13        | 3                      | 11                     | 13         | 2                       | 12                      | 2941.7878          | 0.023            | 0.020             |
| 33       | 6         | 0                      | 6                      | 5          | 0                       | 5                       | 2955.1535          | -0.003           | 0.020             |
| 34       | 3         | 2                      | 1                      | 2          | 1                       | 2                       | 2967.3181          | -0.008           | 0.020             |
| 35       | 11        | 4                      | 7                      | 11         | 3                       | 8                       | 3008.0670          | -0.004           | 0.020             |
| 36       | 6         | 2                      | 5                      | 5          | 2                       | 4                       | 3019.9249          | -0.002           | 0.020             |
| 37       | 6         | 5                      | 2                      | 5          | 5                       | 1                       | 3036.7801          | 0.004            | 0.020             |
| 38       | 6         | 5                      | 1                      | 5          | 5                       | 0                       | 3036.7801          | 0.003            | 0.020             |
| 39       | 6         | 3                      | 4                      | 5          | 3                       | 3                       | 3041.4991          | 0.001            | 0.020             |
| 40       | 6         | 3                      | 3                      | 5          | 3                       | 2                       | 3046.6975          | 0.003            | 0.020             |
| 41       | 10        | 4                      | 6                      | 10         | 3                       | 7                       | 3081.8083          | -0.007           | 0.020             |
| 42       | 6         | 2                      | 4                      | 5          | 2                       | 3                       | 3095.5655          | 0.166            | 0.020             |
| 43       | 6         | 1                      | 5                      | 5          | 1                       | 4                       | 3124.2400          | -0.004           | 0.020             |
| 44       | 9         | 4                      | 5                      | 9          | 3                       | 6                       | 3135.3958          | 0.013            | 0.020             |
| 45       | 6         | 1                      | 6                      | 5          | 0                       | 5                       | 3135.9617          | 0.004            | 0.020             |
| 46       | 8         | 4                      | 4                      | 8          | 3                       | 5                       | 3171.7699          | 0.006            | 0.020             |
| 47       | 7         | 4                      | 3                      | 7          | 3                       | 4                       | 3194.9414          | 0.012            | 0.020             |
| 48       | 6         | 4                      | 2                      | 6          | 3                       | 3                       | 3208.7709          | 0.017            | 0.020             |

|     |    |   |    |    |   |    |           |        |       |
|-----|----|---|----|----|---|----|-----------|--------|-------|
| 49  | 8  | 4 | 5  | 8  | 3 | 6  | 3211.9791 | -0.007 | 0.020 |
| 50  | 9  | 4 | 6  | 9  | 3 | 7  | 3212.6890 | -0.003 | 0.020 |
| 51  | 7  | 4 | 4  | 7  | 3 | 5  | 3213.7465 | -0.004 | 0.020 |
| 52  | 5  | 4 | 1  | 5  | 3 | 2  | 3216.4296 | -0.011 | 0.020 |
| 53  | 6  | 4 | 3  | 6  | 3 | 4  | 3216.4296 | -0.012 | 0.020 |
| 54  | 10 | 4 | 7  | 10 | 3 | 8  | 3217.9207 | 0.000  | 0.020 |
| 55  | 5  | 4 | 2  | 5  | 3 | 3  | 3219.0390 | -0.002 | 0.020 |
| 56  | 11 | 4 | 8  | 11 | 3 | 9  | 3230.1428 | 0.013  | 0.020 |
| 57  | 7  | 0 | 7  | 6  | 1 | 6  | 3243.0476 | 0.002  | 0.020 |
| 58  | 8  | 1 | 7  | 7  | 2 | 6  | 3250.4759 | 0.003  | 0.020 |
| 59  | 12 | 4 | 9  | 12 | 3 | 10 | 3252.0271 | -0.004 | 0.020 |
| 60  | 4  | 2 | 3  | 3  | 1 | 2  | 3286.8899 | -0.010 | 0.020 |
| 61  | 7  | 1 | 7  | 6  | 1 | 6  | 3374.9534 | 0.001  | 0.020 |
| 62  | 7  | 0 | 7  | 6  | 0 | 6  | 3423.8415 | -0.004 | 0.020 |
| 63  | 7  | 2 | 6  | 6  | 2 | 5  | 3517.2454 | 0.001  | 0.020 |
| 64  | 7  | 6 | 1  | 6  | 6 | 0  | 3542.6147 | -0.005 | 0.020 |
| 65  | 7  | 6 | 2  | 6  | 6 | 1  | 3542.6147 | -0.005 | 0.020 |
| 66  | 7  | 5 | 3  | 6  | 5 | 2  | 3544.4266 | 0.001  | 0.020 |
| 67  | 7  | 5 | 2  | 6  | 5 | 1  | 3544.4266 | -0.004 | 0.020 |
| 68  | 7  | 4 | 4  | 6  | 4 | 3  | 3547.7156 | 0.001  | 0.020 |
| 69  | 7  | 4 | 3  | 6  | 4 | 2  | 3548.0756 | -0.004 | 0.020 |
| 70  | 7  | 3 | 5  | 6  | 3 | 4  | 3550.4003 | -0.005 | 0.020 |
| 71  | 4  | 2 | 2  | 3  | 1 | 3  | 3553.3270 | 0.001  | 0.020 |
| 72  | 7  | 1 | 7  | 6  | 0 | 6  | 3555.7554 | 0.002  | 0.020 |
| 73  | 7  | 3 | 4  | 6  | 3 | 3  | 3561.9054 | 0.001  | 0.020 |
| 74  | 7  | 2 | 5  | 6  | 2 | 4  | 3628.8832 | -0.008 | 0.020 |
| 75  | 7  | 1 | 6  | 6  | 1 | 5  | 3632.9295 | -0.004 | 0.020 |
| 76  | 5  | 2 | 4  | 4  | 1 | 3  | 3714.7923 | 0.006  | 0.020 |
| 77  | 8  | 0 | 8  | 7  | 1 | 7  | 3756.6016 | 0.000  | 0.020 |
| 78  | 3  | 3 | 1  | 2  | 2 | 0  | 3818.1144 | -0.003 | 0.020 |
| 79  | 3  | 3 | 0  | 2  | 2 | 1  | 3820.6202 | -0.001 | 0.020 |
| 80  | 8  | 1 | 8  | 7  | 1 | 7  | 3849.3881 | 0.000  | 0.020 |
| 81  | 9  | 1 | 8  | 8  | 2 | 7  | 3867.5168 | 0.005  | 0.020 |
| 82  | 8  | 0 | 8  | 7  | 0 | 7  | 3888.5104 | 0.002  | 0.020 |
| 83  | 8  | 1 | 8  | 7  | 0 | 7  | 3981.2980 | 0.003  | 0.020 |
| 84  | 8  | 2 | 7  | 7  | 2 | 6  | 4011.9068 | 0.005  | 0.020 |
| 85  | 13 | 5 | 8  | 13 | 4 | 9  | 4024.2738 | -0.007 | 0.020 |
| 86  | 8  | 7 | 1  | 7  | 7 | 0  | 4048.4861 | -0.003 | 0.020 |
| 87  | 8  | 7 | 2  | 7  | 7 | 1  | 4048.4861 | -0.003 | 0.020 |
| 88  | 8  | 6 | 3  | 7  | 6 | 2  | 4050.0751 | -0.007 | 0.020 |
| 89  | 8  | 6 | 2  | 7  | 6 | 1  | 4050.0751 | -0.008 | 0.020 |
| 90  | 8  | 5 | 4  | 7  | 5 | 3  | 4052.7844 | 0.007  | 0.020 |
| 91  | 8  | 5 | 3  | 7  | 5 | 2  | 4052.7844 | -0.012 | 0.020 |
| 92  | 8  | 4 | 5  | 7  | 4 | 4  | 4057.4978 | 0.003  | 0.020 |
| 93  | 8  | 4 | 4  | 7  | 4 | 3  | 4058.4928 | 0.001  | 0.020 |
| 94  | 8  | 3 | 6  | 7  | 3 | 5  | 4059.2613 | 0.001  | 0.020 |
| 95  | 12 | 5 | 7  | 12 | 4 | 8  | 4062.7741 | 0.008  | 0.020 |
| 96  | 15 | 5 | 11 | 15 | 4 | 12 | 4075.1402 | 0.000  | 0.020 |
| 97  | 8  | 3 | 5  | 7  | 3 | 4  | 4081.6576 | 0.000  | 0.020 |
| 98  | 11 | 5 | 6  | 11 | 4 | 7  | 4089.8393 | -0.008 | 0.020 |
| 99  | 12 | 5 | 8  | 12 | 4 | 9  | 4097.7987 | 0.002  | 0.020 |
| 100 | 11 | 5 | 7  | 11 | 4 | 8  | 4107.9148 | -0.001 | 0.020 |
| 101 | 10 | 5 | 5  | 10 | 4 | 6  | 4108.6057 | 0.005  | 0.020 |
| 102 | 10 | 5 | 6  | 10 | 4 | 7  | 4117.2411 | 0.000  | 0.020 |
| 103 | 9  | 5 | 4  | 9  | 4 | 5  | 4121.4034 | -0.009 | 0.020 |
| 104 | 8  | 1 | 7  | 7  | 1 | 6  | 4134.9472 | -0.005 | 0.020 |



|     |    |   |    |    |   |    |           |        |       |
|-----|----|---|----|----|---|----|-----------|--------|-------|
| 105 | 8  | 2 | 6  | 7  | 2 | 5  | 4163.3649 | -0.006 | 0.020 |
| 106 | 5  | 2 | 3  | 4  | 1 | 4  | 4180.1967 | 0.003  | 0.020 |
| 107 | 9  | 0 | 9  | 8  | 1 | 8  | 4258.6374 | -0.002 | 0.020 |
| 108 | 4  | 3 | 2  | 3  | 2 | 1  | 4318.2052 | -0.008 | 0.020 |
| 109 | 9  | 1 | 9  | 8  | 1 | 8  | 4321.9821 | 0.001  | 0.020 |
| 110 | 4  | 3 | 1  | 3  | 2 | 2  | 4330.8592 | 0.001  | 0.020 |
| 111 | 9  | 0 | 9  | 8  | 0 | 8  | 4351.4257 | -0.001 | 0.020 |
| 112 | 9  | 1 | 9  | 8  | 0 | 8  | 4414.7633 | -0.004 | 0.020 |
| 113 | 10 | 1 | 9  | 9  | 2 | 8  | 4477.8338 | 0.001  | 0.020 |
| 114 | 9  | 2 | 8  | 8  | 2 | 7  | 4503.6421 | -0.004 | 0.020 |
| 115 | 7  | 2 | 6  | 6  | 1 | 5  | 4517.4104 | -0.003 | 0.020 |
| 116 | 9  | 8 | 1  | 8  | 8 | 0  | 4554.3668 | -0.004 | 0.020 |
| 117 | 9  | 8 | 2  | 8  | 8 | 1  | 4554.3668 | -0.004 | 0.020 |
| 118 | 9  | 7 | 2  | 8  | 7 | 1  | 4555.8175 | -0.007 | 0.020 |
| 119 | 9  | 7 | 3  | 8  | 7 | 2  | 4555.8175 | -0.007 | 0.020 |
| 120 | 9  | 6 | 4  | 8  | 6 | 3  | 4558.0902 | -0.006 | 0.020 |
| 121 | 9  | 6 | 3  | 8  | 6 | 2  | 4558.0902 | -0.007 | 0.020 |
| 122 | 9  | 5 | 5  | 8  | 5 | 4  | 4561.9907 | 0.065  | 0.020 |
| 123 | 9  | 5 | 4  | 8  | 5 | 3  | 4561.9907 | 0.001  | 0.020 |
| 124 | 9  | 3 | 7  | 8  | 3 | 6  | 4567.5401 | -0.004 | 0.020 |
| 125 | 9  | 4 | 6  | 8  | 4 | 5  | 4568.2473 | -0.004 | 0.020 |
| 126 | 9  | 4 | 5  | 8  | 4 | 4  | 4570.6191 | 0.003  | 0.020 |
| 127 | 9  | 3 | 6  | 8  | 3 | 5  | 4606.9960 | 0.000  | 0.020 |
| 128 | 9  | 1 | 8  | 8  | 1 | 7  | 4628.9418 | 0.001  | 0.020 |
| 129 | 9  | 2 | 7  | 8  | 2 | 6  | 4695.9385 | -0.003 | 0.020 |
| 130 | 10 | 0 | 10 | 9  | 1 | 9  | 4750.7932 | -0.009 | 0.020 |
| 131 | 10 | 1 | 10 | 9  | 1 | 9  | 4793.0199 | 0.005  | 0.020 |
| 132 | 5  | 3 | 3  | 4  | 2 | 2  | 4809.0007 | -0.001 | 0.020 |
| 133 | 10 | 0 | 10 | 9  | 0 | 9  | 4814.1451 | 0.002  | 0.020 |
| 134 | 5  | 3 | 2  | 4  | 2 | 3  | 4847.1518 | -0.007 | 0.020 |
| 135 | 8  | 2 | 7  | 7  | 1 | 6  | 4896.3900 | 0.009  | 0.020 |
| 136 | 10 | 2 | 9  | 9  | 2 | 8  | 4992.3046 | -0.002 | 0.020 |
| 137 | 13 | 6 | 7  | 13 | 5 | 8  | 5018.4888 | -0.007 | 0.020 |
| 138 | 13 | 6 | 8  | 13 | 5 | 9  | 5022.1762 | 0.021  | 0.020 |
| 139 | 12 | 6 | 6  | 12 | 5 | 7  | 5031.4825 | 0.027  | 0.020 |
| 140 | 12 | 6 | 7  | 12 | 5 | 8  | 5033.1110 | 0.000  | 0.020 |
| 141 | 10 | 9 | 1  | 9  | 9 | 0  | 5060.2504 | -0.010 | 0.020 |
| 142 | 10 | 9 | 2  | 9  | 9 | 1  | 5060.2504 | -0.010 | 0.020 |
| 143 | 10 | 8 | 2  | 9  | 8 | 1  | 5061.6189 | 0.003  | 0.020 |
| 144 | 10 | 8 | 3  | 9  | 8 | 2  | 5061.6189 | 0.003  | 0.020 |
| 145 | 10 | 7 | 4  | 9  | 7 | 3  | 5063.6178 | 0.006  | 0.020 |
| 146 | 10 | 7 | 3  | 9  | 7 | 2  | 5063.6178 | 0.006  | 0.020 |
| 147 | 10 | 6 | 5  | 9  | 6 | 4  | 5066.7158 | -0.016 | 0.020 |
| 148 | 10 | 6 | 4  | 9  | 6 | 3  | 5066.7158 | -0.020 | 0.020 |
| 149 | 10 | 5 | 6  | 9  | 5 | 5  | 5071.9747 | 0.013  | 0.020 |
| 150 | 10 | 5 | 5  | 9  | 5 | 4  | 5072.1296 | -0.010 | 0.020 |
| 151 | 10 | 3 | 8  | 9  | 3 | 7  | 5074.6859 | 0.007  | 0.020 |
| 152 | 11 | 1 | 10 | 10 | 2 | 9  | 5075.5504 | 0.028  | 0.020 |
| 153 | 10 | 4 | 7  | 9  | 4 | 6  | 5079.9187 | 0.011  | 0.020 |
| 154 | 10 | 4 | 6  | 9  | 4 | 5  | 5084.9440 | -0.007 | 0.020 |
| 155 | 10 | 1 | 9  | 9  | 1 | 8  | 5113.9752 | 0.008  | 0.020 |
| 156 | 10 | 3 | 7  | 9  | 3 | 6  | 5138.5258 | 0.006  | 0.020 |
| 157 | 10 | 2 | 8  | 9  | 2 | 7  | 5224.3148 | 0.000  | 0.020 |
| 158 | 11 | 0 | 11 | 10 | 1 | 10 | 5235.1956 | -0.001 | 0.020 |
| 159 | 4  | 4 | 1  | 3  | 3 | 0  | 5245.9782 | 0.005  | 0.020 |
| 160 | 4  | 4 | 0  | 3  | 3 | 1  | 5246.0600 | -0.010 | 0.020 |

|     |    |    |    |    |    |    |           |        |       |
|-----|----|----|----|----|----|----|-----------|--------|-------|
| 161 | 11 | 1  | 11 | 10 | 1  | 10 | 5262.7966 | 0.003  | 0.020 |
| 162 | 9  | 2  | 8  | 8  | 1  | 7  | 5265.0697 | -0.006 | 0.020 |
| 163 | 11 | 0  | 11 | 10 | 0  | 10 | 5277.4053 | -0.004 | 0.020 |
| 164 | 6  | 3  | 4  | 5  | 2  | 3  | 5284.6804 | 0.000  | 0.020 |
| 165 | 11 | 1  | 11 | 10 | 0  | 10 | 5305.0106 | 0.005  | 0.020 |
| 166 | 6  | 3  | 3  | 5  | 2  | 4  | 5373.5886 | 0.002  | 0.020 |
| 167 | 11 | 2  | 10 | 10 | 2  | 9  | 5477.8154 | 0.000  | 0.020 |
| 168 | 11 | 10 | 1  | 10 | 10 | 0  | 5566.1577 | 0.003  | 0.020 |
| 169 | 11 | 10 | 2  | 10 | 10 | 1  | 5566.1577 | 0.003  | 0.020 |
| 170 | 11 | 9  | 2  | 10 | 9  | 1  | 5567.4488 | 0.012  | 0.020 |
| 171 | 11 | 9  | 3  | 10 | 9  | 2  | 5567.4488 | 0.012  | 0.020 |
| 172 | 11 | 8  | 3  | 10 | 8  | 2  | 5569.2292 | -0.012 | 0.020 |
| 173 | 11 | 8  | 4  | 10 | 8  | 3  | 5569.2292 | -0.012 | 0.020 |
| 174 | 11 | 7  | 5  | 10 | 7  | 4  | 5571.8917 | -0.010 | 0.020 |
| 175 | 11 | 7  | 4  | 10 | 7  | 3  | 5571.8917 | -0.010 | 0.020 |
| 176 | 11 | 6  | 6  | 10 | 6  | 5  | 5576.0552 | -0.006 | 0.020 |
| 177 | 11 | 6  | 5  | 10 | 6  | 4  | 5576.0552 | -0.017 | 0.020 |
| 178 | 11 | 3  | 9  | 10 | 3  | 8  | 5580.0839 | 0.004  | 0.020 |
| 179 | 11 | 5  | 7  | 10 | 5  | 6  | 5582.9581 | -0.005 | 0.020 |
| 180 | 11 | 5  | 6  | 10 | 5  | 5  | 5583.4001 | -0.003 | 0.020 |
| 181 | 11 | 1  | 10 | 10 | 1  | 9  | 5589.9987 | 0.002  | 0.020 |
| 182 | 11 | 4  | 8  | 10 | 4  | 7  | 5592.2926 | 0.004  | 0.020 |
| 183 | 11 | 4  | 7  | 10 | 4  | 6  | 5602.1556 | -0.001 | 0.020 |
| 184 | 10 | 2  | 9  | 9  | 1  | 8  | 5628.4361 | -0.005 | 0.020 |
| 185 | 12 | 1  | 11 | 11 | 2  | 10 | 5655.9100 | 0.000  | 0.020 |
| 186 | 11 | 3  | 8  | 10 | 3  | 7  | 5675.8942 | -0.007 | 0.020 |
| 187 | 12 | 1  | 12 | 11 | 1  | 11 | 5731.5899 | -0.016 | 0.020 |
| 188 | 12 | 0  | 12 | 11 | 0  | 11 | 5741.4451 | 0.007  | 0.020 |
| 189 | 11 | 2  | 9  | 10 | 2  | 8  | 5746.8316 | -0.002 | 0.020 |
| 190 | 7  | 3  | 4  | 6  | 2  | 5  | 5915.5575 | -0.006 | 0.020 |
| 191 | 12 | 2  | 11 | 11 | 2  | 10 | 5960.2021 | -0.015 | 0.020 |
| 192 | 12 | 7  | 5  | 12 | 6  | 6  | 5966.5193 | 0.022  | 0.020 |
| 193 | 11 | 7  | 4  | 11 | 6  | 5  | 5971.9319 | -0.005 | 0.020 |
| 194 | 11 | 7  | 5  | 11 | 6  | 6  | 5971.9319 | -0.020 | 0.020 |
| 195 | 10 | 7  | 3  | 10 | 6  | 4  | 5976.1009 | -0.007 | 0.020 |
| 196 | 10 | 7  | 4  | 10 | 6  | 5  | 5976.1009 | -0.011 | 0.020 |
| 197 | 9  | 7  | 2  | 9  | 6  | 3  | 5979.2125 | -0.019 | 0.020 |
| 198 | 9  | 7  | 3  | 9  | 6  | 4  | 5979.2125 | -0.020 | 0.020 |
| 199 | 12 | 1  | 11 | 11 | 1  | 10 | 6058.2073 | 0.004  | 0.020 |
| 200 | 12 | 11 | 1  | 11 | 11 | 0  | 6072.0504 | 0.001  | 0.020 |
| 201 | 12 | 11 | 2  | 11 | 11 | 1  | 6072.0504 | 0.001  | 0.020 |
| 202 | 12 | 10 | 2  | 11 | 10 | 1  | 6073.2694 | -0.006 | 0.020 |
| 203 | 12 | 10 | 3  | 11 | 10 | 2  | 6073.2694 | -0.006 | 0.020 |
| 204 | 12 | 9  | 3  | 11 | 9  | 2  | 6074.9419 | 0.001  | 0.020 |
| 205 | 12 | 9  | 4  | 11 | 9  | 3  | 6074.9419 | 0.001  | 0.020 |
| 206 | 12 | 8  | 4  | 11 | 8  | 3  | 6077.2858 | -0.001 | 0.020 |
| 207 | 12 | 8  | 5  | 11 | 8  | 4  | 6077.2858 | -0.001 | 0.020 |
| 208 | 12 | 7  | 6  | 11 | 7  | 5  | 6080.7386 | -0.007 | 0.020 |
| 209 | 12 | 7  | 5  | 11 | 7  | 4  | 6080.7386 | -0.007 | 0.020 |
| 210 | 12 | 3  | 10 | 11 | 3  | 9  | 6083.1991 | -0.001 | 0.020 |
| 211 | 12 | 6  | 7  | 11 | 6  | 6  | 6086.1661 | 0.011  | 0.020 |
| 212 | 12 | 6  | 6  | 11 | 6  | 5  | 6086.1661 | -0.019 | 0.020 |
| 213 | 12 | 5  | 8  | 11 | 5  | 7  | 6094.9824 | -0.001 | 0.020 |
| 214 | 12 | 5  | 7  | 11 | 5  | 6  | 6095.9766 | -0.001 | 0.020 |
| 215 | 12 | 4  | 9  | 11 | 4  | 8  | 6105.0951 | -0.007 | 0.020 |
| 216 | 12 | 4  | 8  | 11 | 4  | 7  | 6123.0606 | 0.002  | 0.020 |

|     |    |    |    |    |    |    |           |        |       |
|-----|----|----|----|----|----|----|-----------|--------|-------|
| 217 | 8  | 3  | 6  | 7  | 2  | 5  | 6170.0385 | -0.017 | 0.020 |
| 218 | 13 | 1  | 13 | 12 | 1  | 12 | 6199.6990 | -0.004 | 0.020 |
| 219 | 13 | 0  | 13 | 12 | 0  | 12 | 6206.1758 | 0.000  | 0.020 |
| 220 | 13 | 1  | 12 | 12 | 2  | 11 | 6216.4791 | -0.010 | 0.020 |
| 221 | 12 | 3  | 9  | 11 | 3  | 8  | 6217.5674 | 0.003  | 0.020 |
| 222 | 6  | 4  | 3  | 5  | 3  | 2  | 6255.2991 | -0.012 | 0.020 |
| 223 | 6  | 4  | 2  | 5  | 3  | 3  | 6258.0805 | 0.003  | 0.020 |
| 224 | 12 | 2  | 10 | 11 | 2  | 9  | 6262.2015 | 0.000  | 0.020 |
| 225 | 12 | 2  | 11 | 11 | 1  | 10 | 6362.5208 | 0.010  | 0.020 |
| 226 | 13 | 2  | 12 | 12 | 2  | 11 | 6439.6753 | 0.004  | 0.020 |
| 227 | 8  | 3  | 5  | 7  | 2  | 6  | 6479.9719 | -0.006 | 0.020 |
| 228 | 13 | 1  | 12 | 12 | 1  | 11 | 6520.7982 | 0.001  | 0.020 |
| 229 | 9  | 3  | 7  | 8  | 2  | 6  | 6574.2373 | 0.009  | 0.020 |
| 230 | 13 | 11 | 2  | 12 | 11 | 1  | 6579.1174 | -0.009 | 0.020 |
| 231 | 13 | 11 | 3  | 12 | 11 | 2  | 6579.1174 | -0.009 | 0.020 |
| 232 | 13 | 10 | 3  | 12 | 10 | 2  | 6580.6851 | 0.000  | 0.020 |
| 233 | 13 | 10 | 4  | 12 | 10 | 3  | 6580.6851 | 0.000  | 0.020 |
| 234 | 13 | 9  | 4  | 12 | 9  | 3  | 6582.8072 | 0.002  | 0.020 |
| 235 | 13 | 9  | 5  | 12 | 9  | 4  | 6582.8072 | 0.002  | 0.020 |
| 236 | 13 | 3  | 11 | 12 | 3  | 10 | 6583.5590 | -0.004 | 0.020 |
| 237 | 13 | 8  | 6  | 12 | 8  | 5  | 6585.7900 | -0.001 | 0.020 |
| 238 | 13 | 8  | 5  | 12 | 8  | 4  | 6585.7900 | -0.001 | 0.020 |
| 239 | 13 | 7  | 7  | 12 | 7  | 6  | 6590.1953 | -0.002 | 0.020 |
| 240 | 13 | 7  | 6  | 12 | 7  | 5  | 6590.1953 | -0.004 | 0.020 |
| 241 | 13 | 6  | 8  | 12 | 6  | 7  | 6597.1293 | 0.043  | 0.020 |
| 242 | 13 | 6  | 7  | 12 | 6  | 6  | 6597.1293 | -0.034 | 0.020 |
| 243 | 13 | 5  | 9  | 12 | 5  | 8  | 6608.0452 | 0.003  | 0.020 |
| 244 | 13 | 5  | 8  | 12 | 5  | 7  | 6610.1180 | -0.005 | 0.020 |
| 245 | 13 | 4  | 10 | 12 | 4  | 9  | 6617.9389 | -0.005 | 0.020 |
| 246 | 13 | 4  | 9  | 12 | 4  | 8  | 6648.6043 | -0.004 | 0.020 |
| 247 | 14 | 0  | 14 | 13 | 1  | 13 | 6660.1797 | -0.007 | 0.020 |
| 248 | 14 | 1  | 14 | 13 | 1  | 13 | 6667.2859 | -0.003 | 0.020 |
| 249 | 14 | 0  | 14 | 13 | 0  | 13 | 6671.4760 | -0.002 | 0.020 |
| 250 | 5  | 5  | 1  | 4  | 4  | 0  | 6672.6112 | 0.000  | 0.020 |
| 251 | 5  | 5  | 0  | 4  | 4  | 1  | 6672.6112 | -0.003 | 0.020 |
| 252 | 14 | 1  | 14 | 13 | 0  | 13 | 6678.5659 | -0.014 | 0.020 |
| 253 | 13 | 2  | 12 | 12 | 1  | 11 | 6743.9956 | 0.017  | 0.020 |
| 254 | 7  | 4  | 4  | 6  | 3  | 3  | 6756.3306 | -0.001 | 0.020 |
| 255 | 14 | 1  | 13 | 13 | 2  | 12 | 6757.1797 | 0.000  | 0.020 |
| 256 | 13 | 3  | 10 | 12 | 3  | 9  | 6760.8335 | 0.000  | 0.020 |
| 257 | 7  | 4  | 3  | 6  | 3  | 4  | 6764.6547 | -0.004 | 0.020 |
| 258 | 13 | 2  | 11 | 12 | 2  | 10 | 6769.2650 | 0.003  | 0.020 |
| 259 | 14 | 2  | 13 | 13 | 2  | 12 | 6916.4317 | -0.003 | 0.020 |
| 260 | 10 | 3  | 8  | 9  | 2  | 7  | 6952.9702 | 0.005  | 0.020 |
| 261 | 14 | 1  | 13 | 13 | 1  | 12 | 6980.3666 | 0.005  | 0.020 |
| 262 | 9  | 3  | 6  | 8  | 2  | 7  | 7075.0725 | 0.001  | 0.020 |
| 263 | 14 | 3  | 12 | 13 | 3  | 11 | 7080.7918 | 0.002  | 0.020 |
| 264 | 14 | 11 | 3  | 13 | 11 | 2  | 7086.4629 | 0.003  | 0.020 |
| 265 | 14 | 11 | 4  | 13 | 11 | 3  | 7086.4629 | 0.003  | 0.020 |
| 266 | 14 | 10 | 4  | 13 | 10 | 3  | 7088.4137 | 0.005  | 0.020 |
| 267 | 14 | 10 | 5  | 13 | 10 | 4  | 7088.4137 | 0.005  | 0.020 |
| 268 | 14 | 8  | 6  | 13 | 8  | 5  | 7094.7999 | 0.005  | 0.020 |
| 269 | 14 | 8  | 7  | 13 | 8  | 6  | 7094.7999 | 0.005  | 0.020 |
| 270 | 14 | 7  | 8  | 13 | 7  | 7  | 7100.3083 | -0.003 | 0.020 |
| 271 | 14 | 7  | 7  | 13 | 7  | 6  | 7100.3083 | -0.008 | 0.020 |
| 272 | 14 | 6  | 9  | 13 | 6  | 8  | 7108.9250 | 0.003  | 0.020 |

|     |    |    |    |    |    |    |           |        |       |
|-----|----|----|----|----|----|----|-----------|--------|-------|
| 273 | 14 | 6  | 8  | 13 | 6  | 7  | 7109.0962 | -0.007 | 0.020 |
| 274 | 14 | 5  | 10 | 13 | 5  | 9  | 7122.1061 | -0.002 | 0.020 |
| 275 | 14 | 5  | 9  | 13 | 5  | 8  | 7126.1874 | -0.001 | 0.020 |
| 276 | 15 | 0  | 15 | 14 | 1  | 14 | 7130.0954 | 0.003  | 0.020 |
| 277 | 14 | 4  | 11 | 13 | 4  | 10 | 7130.3064 | -0.004 | 0.020 |
| 278 | 15 | 1  | 15 | 14 | 1  | 14 | 7134.5212 | 0.002  | 0.020 |
| 279 | 14 | 2  | 13 | 13 | 1  | 12 | 7139.6275 | 0.012  | 0.020 |
| 280 | 15 | 1  | 15 | 14 | 0  | 14 | 7141.6282 | 0.007  | 0.020 |
| 281 | 6  | 5  | 2  | 5  | 4  | 1  | 7178.4005 | 0.011  | 0.020 |
| 282 | 6  | 5  | 1  | 5  | 4  | 2  | 7178.4005 | -0.018 | 0.020 |
| 283 | 14 | 4  | 10 | 13 | 4  | 9  | 7179.7254 | 0.000  | 0.020 |
| 284 | 8  | 4  | 5  | 7  | 3  | 4  | 7251.9211 | -0.001 | 0.020 |
| 285 | 14 | 2  | 12 | 13 | 2  | 11 | 7266.9622 | -0.002 | 0.020 |
| 286 | 8  | 4  | 4  | 7  | 3  | 5  | 7272.7465 | 0.001  | 0.020 |
| 287 | 15 | 1  | 14 | 14 | 2  | 13 | 7279.8400 | 0.003  | 0.020 |
| 288 | 14 | 3  | 11 | 13 | 3  | 10 | 7302.5676 | -0.001 | 0.020 |
| 289 | 11 | 3  | 9  | 10 | 2  | 8  | 7308.7336 | 0.003  | 0.020 |
| 290 | 15 | 2  | 14 | 14 | 2  | 13 | 7390.8370 | 0.000  | 0.020 |
| 291 | 15 | 1  | 14 | 14 | 1  | 13 | 7439.0922 | 0.000  | 0.020 |
| 292 | 15 | 3  | 13 | 14 | 3  | 12 | 7574.6123 | -0.002 | 0.020 |
| 293 | 15 | 10 | 5  | 14 | 10 | 4  | 7596.4577 | -0.013 | 0.020 |
| 294 | 15 | 9  | 6  | 14 | 9  | 5  | 7599.7380 | 0.004  | 0.020 |
| 295 | 15 | 9  | 7  | 14 | 9  | 6  | 7599.7380 | 0.004  | 0.020 |
| 296 | 15 | 8  | 8  | 14 | 8  | 7  | 7604.3441 | 0.006  | 0.020 |
| 297 | 15 | 8  | 7  | 14 | 8  | 6  | 7604.3441 | 0.006  | 0.020 |
| 298 | 15 | 7  | 9  | 14 | 7  | 8  | 7611.1549 | 0.012  | 0.020 |
| 299 | 15 | 7  | 8  | 14 | 7  | 7  | 7611.1549 | -0.002 | 0.020 |
| 300 | 15 | 6  | 10 | 14 | 6  | 9  | 7621.7240 | 0.000  | 0.020 |
| 301 | 15 | 6  | 9  | 14 | 6  | 8  | 7622.1263 | 0.003  | 0.020 |
| 302 | 15 | 5  | 11 | 14 | 5  | 10 | 7637.0803 | 0.001  | 0.020 |
| 303 | 15 | 4  | 12 | 14 | 4  | 11 | 7641.6434 | 0.010  | 0.020 |
| 304 | 15 | 5  | 10 | 14 | 5  | 9  | 7644.6444 | 0.003  | 0.020 |
| 305 | 12 | 3  | 10 | 11 | 2  | 9  | 7645.1068 | 0.009  | 0.020 |
| 306 | 10 | 3  | 7  | 9  | 2  | 8  | 7709.9425 | -0.002 | 0.020 |
| 307 | 15 | 4  | 11 | 14 | 4  | 10 | 7717.0135 | 0.001  | 0.020 |
| 308 | 9  | 4  | 6  | 8  | 3  | 5  | 7738.5040 | -0.011 | 0.020 |
| 309 | 15 | 2  | 13 | 14 | 2  | 12 | 7754.5638 | 0.001  | 0.020 |
| 310 | 15 | 3  | 12 | 14 | 3  | 11 | 7839.8865 | -0.004 | 0.020 |

**Table S8.** Equilibrium coordinates for isomer I (Gg $\pi$ +Gg $\pi$ -Lp-) of 2-phenylethanol dimer, according to the prediction with B3LYP-D3(BJ) /def2TZVP.

| Atom | $a / \text{\AA}^a$ | $b / \text{\AA}$ | $c / \text{\AA}$ |
|------|--------------------|------------------|------------------|
| C    | -2.7787            | 0.4672           | 1.2430           |
| C    | -2.3165            | 1.1881           | 0.1413           |
| C    | -2.6317            | 0.7224           | -1.1348          |
| C    | -3.3939            | -0.4274          | -1.3069          |
| C    | -3.8525            | -1.1326          | -0.2013          |
| C    | -3.5399            | -0.6819          | 1.0768           |
| H    | -2.5436            | 0.8150           | 2.2422           |
| H    | -2.2780            | 1.2695           | -1.9997          |
| H    | -3.6318            | -0.7702          | -2.3058          |
| H    | -4.4508            | -2.0248          | -0.3330          |
| H    | -3.8957            | -1.2231          | 1.9444           |
| C    | -1.4623            | 2.4141           | 0.3261           |
| H    | -1.7786            | 2.9580           | 1.2205           |
| H    | -1.5833            | 3.0863           | -0.5256          |
| C    | 0.0249             | 2.0873           | 0.4743           |
| H    | 0.5915             | 3.0076           | 0.6205           |
| H    | 0.1860             | 1.4438           | 1.3450           |
| O    | 0.5666             | 1.4777           | -0.6924          |
| H    | 0.2499             | 0.5654           | -0.7512          |
| C    | 1.9630             | -1.4595          | -1.0526          |
| C    | 2.4493             | -1.1395          | 0.2145           |
| C    | 1.5805             | -1.2420          | 1.3027           |
| C    | 0.2582             | -1.6279          | 1.1294           |
| C    | -0.2216            | -1.9248          | -0.1420          |
| C    | 0.6390             | -1.8476          | -1.2319          |
| H    | 2.6220             | -1.3762          | -1.9072          |
| H    | 1.9439             | -1.0018          | 2.2953           |
| H    | -0.4061            | -1.6880          | 1.9815           |
| H    | -1.2565            | -2.2025          | -0.2799          |
| H    | 0.2756             | -2.0804          | -2.2248          |
| C    | 3.8388             | -0.5967          | 0.3930           |
| H    | 4.4800             | -0.9242          | -0.4275          |
| H    | 4.2745             | -0.9700          | 1.3246           |
| C    | 3.8538             | 0.9406           | 0.4353           |
| H    | 3.2531             | 1.2823           | 1.2888           |
| H    | 4.8789             | 1.2805           | 0.5992           |
| O    | 3.4144             | 1.5336           | -0.7663          |
| H    | 2.4423             | 1.4877           | -0.8068          |

**Table S9.** Equilibrium coordinates for isomer II (Gg $\pi$ +Gg $\pi$ -Lp+) of 2-phenylethanol dimer, according to the prediction with B3LYP-D3(BJ) /def2TZVP.

| Atom | $a / \text{\AA}$ | $b / \text{\AA}$ | $c / \text{\AA}$ |
|------|------------------|------------------|------------------|
| C    | 3.0756           | -0.2666          | -0.7134          |
| C    | 2.2936           | 0.8028           | -0.2723          |
| C    | 1.8976           | 0.8304           | 1.0632           |
| C    | 2.2810           | -0.1791          | 1.9390           |
| C    | 3.0594           | -1.2379          | 1.4894           |
| C    | 3.4554           | -1.2798          | 0.1563           |
| H    | 3.3971           | -0.3019          | -1.7481          |
| H    | 1.2693           | 1.6394           | 1.4145           |
| H    | 1.9666           | -0.1390          | 2.9743           |
| H    | 3.3579           | -2.0238          | 2.1711           |
| H    | 4.0655           | -2.0988          | -0.2029          |
| C    | 1.8613           | 1.8838           | -1.2285          |
| H    | 1.4815           | 2.7410           | -0.6695          |
| H    | 2.7185           | 2.2321           | -1.8132          |
| C    | 0.7817           | 1.4243           | -2.2093          |
| H    | 1.1530           | 0.5998           | -2.8262          |
| H    | 0.5155           | 2.2463           | -2.8750          |
| O    | -0.4245          | 1.0363           | -1.5591          |
| H    | -0.3201          | 0.1485           | -1.1883          |
| C    | -3.0083          | -1.0860          | -0.5120          |
| C    | -2.3602          | -0.5752          | 0.6138           |
| C    | -1.0692          | -1.0221          | 0.8920           |
| C    | -0.4286          | -1.9338          | 0.0590           |
| C    | -1.0845          | -2.4274          | -1.0644          |
| C    | -2.3806          | -2.0048          | -1.3428          |
| H    | -4.0114          | -0.7497          | -0.7463          |
| H    | -0.5486          | -0.6300          | 1.7540           |
| H    | 0.5828           | -2.2443          | 0.2851           |
| H    | -0.5903          | -3.1364          | -1.7160          |
| H    | -2.8994          | -2.3862          | -2.2130          |
| C    | -2.9924          | 0.4996           | 1.4533           |
| H    | -4.0702          | 0.3314           | 1.5370           |
| H    | -2.5759          | 0.4770           | 2.4624           |
| C    | -2.7711          | 1.9054           | 0.8701           |
| H    | -3.2577          | 2.6371           | 1.5193           |
| H    | -3.2451          | 1.9681           | -0.1164          |
| O    | -1.4050          | 2.2626           | 0.7916           |
| H    | -1.0386          | 1.8944           | -0.0325          |

**Table S10.** Equilibrium coordinates for isomer III (Gg $\pi$ -Gg $\pi$ -Lp-) of 2-phenylethanol dimer, according to the prediction with B3LYP-D3(BJ) /def2TZVP.

| Atom | $a / \text{\AA}$ | $b / \text{\AA}$ | $c / \text{\AA}$ |
|------|------------------|------------------|------------------|
| C    | 2.4665           | 0.5157           | 1.2782           |
| C    | 2.4116           | 1.1394           | 0.0320           |
| C    | 3.0559           | 0.5280           | -1.0442          |
| C    | 3.7411           | -0.6687          | -0.8809          |
| C    | 3.7888           | -1.2802          | 0.3674           |
| C    | 3.1472           | -0.6844          | 1.4461           |
| H    | 1.9705           | 0.9772           | 2.1229           |
| H    | 3.0262           | 1.0003           | -2.0192          |
| H    | 4.2414           | -1.1231          | -1.7266          |
| H    | 4.3247           | -2.2114          | 0.4977           |
| H    | 3.1806           | -1.1516          | 2.4222           |
| C    | 1.6398           | 2.4179           | -0.1579          |
| H    | 2.1066           | 3.0216           | -0.9409          |
| H    | 1.6557           | 3.0063           | 0.7617           |
| C    | 0.1802           | 2.1830           | -0.5520          |
| H    | -0.3155          | 3.1408           | -0.7135          |
| H    | 0.1252           | 1.6097           | -1.4827          |
| O    | -0.5622          | 1.5276           | 0.4720           |
| H    | -0.3061          | 0.5949           | 0.4991           |
| C    | -1.9031          | -0.9907          | -1.3866          |
| C    | -2.5215          | -1.1278          | -0.1447          |
| C    | -1.7602          | -1.6046          | 0.9244           |
| C    | -0.4153          | -1.9151          | 0.7621           |
| C    | 0.1926           | -1.7626          | -0.4807          |
| C    | -0.5600          | -1.3070          | -1.5562          |
| H    | -2.4778          | -0.6101          | -2.2213          |
| H    | -2.2225          | -1.7169          | 1.8982           |
| H    | 0.1645           | -2.2689          | 1.6046           |
| H    | 1.2430           | -1.9845          | -0.6019          |
| H    | -0.0951          | -1.1857          | -2.5264          |
| C    | -3.9393          | -0.6747          | 0.0641           |
| H    | -4.4583          | -0.6239          | -0.8948          |
| H    | -4.4790          | -1.3872          | 0.6956           |
| C    | -4.0062          | 0.7098           | 0.7300           |
| H    | -5.0531          | 1.0039           | 0.8342           |
| H    | -3.5786          | 0.6483           | 1.7387           |
| O    | -3.3665          | 1.7141           | -0.0279          |
| H    | -2.4076          | 1.6548           | 0.1326           |

**Table S11.** Equilibrium coordinates for isomer I (Gg $\pi^-$  Gg $\pi^+$  Gg $\pi^+$  Lp-) of 2-phenylethanol trimer, according to the prediction with B3LYP-D3(BJ) /def2TZVP.

| Atom | $a / \text{Å}$ | $b / \text{Å}$ | $c / \text{Å}$ |
|------|----------------|----------------|----------------|
| C    | -0.8865        | -3.6926        | -0.0106        |
| C    | -2.0478        | -3.1303        | 0.5059         |
| C    | -2.8075        | -2.2322        | -0.2438        |
| C    | -2.3656        | -1.9008        | -1.5246        |
| C    | -1.2071        | -2.4614        | -2.0469        |
| C    | -0.4643        | -3.3624        | -1.2927        |
| C    | -4.0576        | -1.6174        | 0.3255         |
| C    | -3.8043        | -0.2963        | 1.0466         |
| O    | -3.3503        | 0.6635         | 0.1156         |
| H    | -0.3181        | -4.3972        | 0.5838         |
| H    | -2.3766        | -3.4009        | 1.5028         |
| H    | -2.9395        | -1.1969        | -2.1126        |
| H    | -0.8876        | -2.1996        | -3.0478        |
| H    | 0.4311         | -3.8093        | -1.7053        |
| H    | -4.5231        | -2.3099        | 1.0315         |
| H    | -4.7795        | -1.4340        | -0.4737        |
| H    | -4.7361        | 0.0327         | 1.5257         |
| H    | -3.0639        | -0.4519        | 1.8413         |
| H    | -2.8877        | 1.3764         | 0.6007         |
| C    | 4.6274         | -0.0178        | 0.6852         |
| C    | 3.5133         | -0.1124        | 1.5112         |
| C    | 2.5192         | -1.0598        | 1.2669         |
| C    | 2.6666         | -1.9078        | 0.1691         |
| C    | 3.7796         | -1.8202        | -0.6563        |
| C    | 4.7665         | -0.8742        | -0.4000        |
| C    | 1.2973         | -1.1403        | 2.1434         |
| C    | 0.1458         | -0.2659        | 1.6490         |
| O    | 0.4881         | 1.1231         | 1.6413         |
| H    | 5.3897         | 0.7222         | 0.8932         |
| H    | 3.4119         | 0.5546         | 2.3583         |
| H    | 1.8977         | -2.6398        | -0.0386        |
| H    | 3.8787         | -2.4918        | -1.4998        |
| H    | 5.6365         | -0.8066        | -1.0403        |
| H    | 0.9352         | -2.1703        | 2.1851         |
| H    | 1.5495         | -0.8373        | 3.1617         |
| H    | -0.1811        | -0.5807        | 0.6561         |
| H    | -0.7026        | -0.3596        | 2.3268         |
| H    | 1.0788         | 1.2902         | 0.8930         |
| C    | 2.0712         | 2.6041         | -1.1735        |
| C    | 0.9328         | 3.3725         | -0.9649        |
| C    | -0.3415        | 2.8215         | -1.1145        |



|   |         |         |         |
|---|---------|---------|---------|
| C | -0.4492 | 1.4858  | -1.4995 |
| C | 0.6884  | 0.7166  | -1.7175 |
| C | 1.9520  | 1.2685  | -1.5472 |
| C | -1.5654 | 3.6265  | -0.7674 |
| C | -1.7307 | 3.8022  | 0.7474  |
| O | -1.8644 | 2.5665  | 1.4370  |
| H | 3.0520  | 3.0418  | -1.0384 |
| H | 1.0342  | 4.4095  | -0.6660 |
| H | -1.4293 | 1.0341  | -1.5816 |
| H | 0.5861  | -0.3250 | -1.9894 |
| H | 2.8348  | 0.6615  | -1.6866 |
| H | -2.4568 | 3.1393  | -1.1660 |
| H | -1.5072 | 4.6226  | -1.2169 |
| H | -0.8826 | 4.3641  | 1.1527  |
| H | -2.6374 | 4.3736  | 0.9529  |
| H | -0.9887 | 2.1288  | 1.5017  |
| H | -0.9887 | 2.1288  | 1.5017  |

---

**Table S12.** Equilibrium coordinates for isomer II (E Gg $\pi^+$  Gg $\pi^-$  Lp-) of 2-phenylethanol trimer, according to the prediction with B3LYP-D3(BJ) /def2TZVP.

| Atom | $a / \text{\AA}$ | $b / \text{\AA}$ | $c / \text{\AA}$ |
|------|------------------|------------------|------------------|
| C    | -3.3128          | -0.3479          | -0.7519          |
| C    | -2.5468          | -0.1405          | 0.3896           |
| C    | -3.9367          | -1.5703          | -0.9643          |
| C    | -2.3934          | -1.1524          | 1.3363           |
| C    | -3.0199          | -2.3792          | 1.1093           |
| C    | -1.5385          | -0.9464          | 2.5594           |
| C    | -3.7871          | -2.5890          | -0.0284          |
| C    | -0.0949          | -1.4095          | 2.3635           |
| O    | 0.6014           | -0.6164          | 1.4075           |
| C    | -1.2004          | 2.6753           | -1.8551          |
| C    | -0.0410          | 2.5749           | -1.0952          |
| C    | -0.0276          | 2.9710           | 0.2441           |
| C    | -1.2124          | 3.4646           | 0.7943           |
| C    | -2.3745          | 3.5618           | 0.0387           |
| C    | -2.3724          | 3.1680           | -1.2939          |
| C    | 1.2124           | 2.8739           | 1.0994           |
| C    | 2.5450           | 3.1205           | 0.3873           |
| O    | 2.9511           | 2.0561           | -0.4578          |
| C    | 0.4807           | -3.3276          | -0.9930          |
| C    | 1.8357           | -3.0821          | -0.8138          |
| C    | 2.3883           | -1.8408          | -1.1330          |
| C    | 1.5529           | -0.8551          | -1.6571          |
| C    | 0.1941           | -1.0966          | -1.8366          |
| C    | -0.3481          | -2.3319          | -1.4989          |
| C    | 3.8297           | -1.5405          | -0.8223          |
| C    | 4.0569           | -1.2924          | 0.6743           |
| O    | 3.3162           | -0.1877          | 1.1732           |
| H    | -3.4188          | 0.4534           | -1.4704          |
| H    | -2.0706          | 0.8183           | 0.5447           |
| H    | -4.5375          | -1.7298          | -1.8505          |
| H    | -2.9126          | -3.1747          | 1.8377           |
| H    | -1.9577          | -1.5015          | 3.4032           |
| H    | -1.5251          | 0.1099           | 2.8353           |
| H    | -4.2725          | -3.5443          | -0.1832          |
| H    | -0.0699          | -2.4630          | 2.0665           |
| H    | 0.4597           | -1.3031          | 3.2965           |
| H    | 0.2326           | -0.7692          | 0.5247           |
| H    | -1.1859          | 2.3696           | -2.8942          |
| H    | 0.8687           | 2.1955           | -1.5368          |
| H    | -1.2217          | 3.7824           | 1.8306           |

|   |         |         |         |
|---|---------|---------|---------|
| H | -3.2795 | 3.9488  | 0.4896  |
| H | -3.2736 | 3.2482  | -1.8882 |
| H | 1.1256  | 3.5946  | 1.9180  |
| H | 1.2483  | 1.8848  | 1.5672  |
| H | 2.4721  | 4.0088  | -0.2440 |
| H | 3.3137  | 3.3169  | 1.1444  |
| H | 3.1510  | 1.2842  | 0.1067  |
| H | 0.0669  | -4.2934 | -0.7320 |
| H | 2.4724  | -3.8603 | -0.4086 |
| H | 1.9648  | 0.1184  | -1.8878 |
| H | -0.4463 | -0.3128 | -2.2174 |
| H | -1.4076 | -2.5090 | -1.6153 |
| H | 4.1560  | -0.6597 | -1.3782 |
| H | 4.4682  | -2.3756 | -1.1260 |
| H | 5.1097  | -1.0667 | 0.8515  |
| H | 3.8088  | -2.1962 | 1.2415  |
| H | 2.3751  | -0.4381 | 1.2764  |

---

**Table S13.** Equilibrium coordinates for isomer I (Gg+ At Gg- Gg $\pi$ +) of 2-phenylethanol tetramer, according to the prediction with B3LYP-D3(BJ) /def2TZVP.

| Atom | <i>a</i> / Å | <i>b</i> / Å | <i>c</i> / Å |
|------|--------------|--------------|--------------|
| C    | 2.6532       | -0.8614      | -3.3027      |
| C    | 1.7922       | 0.0600       | -2.7183      |
| C    | 2.2768       | 1.0443       | -1.8570      |
| C    | 3.6460       | 1.0777       | -1.5898      |
| C    | 4.5113       | 0.1629       | -2.1766      |
| C    | 4.0167       | -0.8106      | -3.0381      |
| C    | 1.3420       | 2.0317       | -1.2129      |
| C    | 0.8974       | 1.6337       | 0.1954       |
| O    | 0.1781       | 0.4063       | 0.2263       |
| C    | 1.9167       | 0.6133       | 3.5795       |
| C    | 2.0157       | -0.6279      | 2.9629       |
| C    | 3.0930       | -0.9309      | 2.1310       |
| C    | 4.0669       | 0.0473       | 1.9257       |
| C    | 3.9758       | 1.2877       | 2.5439       |
| C    | 2.8991       | 1.5746       | 3.3759       |
| C    | 3.1867       | -2.2643      | 1.4391       |
| C    | 2.5308       | -2.2726      | 0.0564       |
| O    | 1.1231       | -2.0878      | 0.1314       |
| C    | -2.4185      | 3.4426       | 1.2865       |
| C    | -2.9799      | 2.5301       | 0.4045       |
| C    | -2.7469      | 2.6222       | -0.9686      |
| C    | -1.9320      | 3.6529       | -1.4312      |
| C    | -1.3707      | 4.5735       | -0.5530      |
| C    | -1.6130      | 4.4722       | 0.8105       |
| C    | -3.3761      | 1.6420       | -1.9280      |
| C    | -3.0106      | 0.1881       | -1.6690      |
| O    | -1.6039      | 0.0251       | -1.8137      |
| C    | -2.7553      | -0.8059      | 2.0177       |
| C    | -2.0084      | -1.8135      | 1.4202       |
| C    | -2.6300      | -2.8346      | 0.7030       |
| C    | -4.0213      | -2.8179      | 0.5926       |
| C    | -4.7733      | -1.8171      | 1.1946       |
| C    | -4.1410      | -0.8084      | 1.9139       |
| C    | -1.8199      | -3.9250      | 0.0518       |
| C    | -1.5542      | -3.7066      | -1.4401      |
| O    | -0.7846      | -2.5466      | -1.7192      |
| H    | 2.2551       | -1.6210      | -3.9633      |
| H    | 0.7314       | 0.0183       | -2.9296      |
| H    | 4.0367       | 1.8314       | -0.9166      |
| H    | 5.5720       | 0.2105       | -1.9635      |
| H    | 4.6889       | -1.5245      | -3.4967      |

|   |         |         |         |
|---|---------|---------|---------|
| H | 1.8244  | 3.0106  | -1.1395 |
| H | 0.4542  | 2.1611  | -1.8333 |
| H | 1.7618  | 1.4971  | 0.8421  |
| H | 0.2788  | 2.4306  | 0.6149  |
| H | -0.5392 | 0.4214  | -0.4454 |
| H | 1.0699  | 0.8299  | 4.2179  |
| H | 1.2463  | -1.3720 | 3.1246  |
| H | 4.9055  | -0.1685 | 1.2749  |
| H | 4.7457  | 2.0306  | 2.3774  |
| H | 2.8253  | 2.5406  | 3.8582  |
| H | 4.2370  | -2.5423 | 1.3138  |
| H | 2.7151  | -3.0370 | 2.0503  |
| H | 2.9799  | -1.5085 | -0.5786 |
| H | 2.6976  | -3.2420 | -0.4177 |
| H | 0.9070  | -1.1258 | 0.2139  |
| H | -2.6099 | 3.3517  | 2.3483  |
| H | -3.6035 | 1.7326  | 0.7854  |
| H | -1.7349 | 3.7353  | -2.4933 |
| H | -0.7401 | 5.3661  | -0.9355 |
| H | -1.1755 | 5.1849  | 1.4976  |
| H | -4.4663 | 1.7250  | -1.8714 |
| H | -3.0889 | 1.8991  | -2.9495 |
| H | -3.5356 | -0.4467 | -2.3907 |
| H | -3.3261 | -0.1168 | -0.6682 |
| H | -1.3922 | -0.9374 | -1.8201 |
| H | -2.2473 | -0.0151 | 2.5536  |
| H | -0.9312 | -1.8048 | 1.5049  |
| H | -4.5220 | -3.6050 | 0.0403  |
| H | -5.8524 | -1.8268 | 1.1071  |
| H | -4.7264 | -0.0302 | 2.3872  |
| H | -0.8608 | -4.0245 | 0.5639  |
| H | -2.3400 | -4.8822 | 0.1536  |
| H | -1.0504 | -4.5921 | -1.8452 |
| H | -2.4978 | -3.5891 | -1.9770 |
| H | -0.0086 | -2.4997 | -1.1123 |

---

**Table S14.** Equilibrium coordinates for isomer II (Gg $\pi$ + Gg+ Gg $\pi$ + Gt) of 2-phenylethanol tetramer, according to the prediction with B3LYP-D3(BJ) /def2TZVP.

| Atom | <i>a</i> / Å | <i>b</i> / Å | <i>c</i> / Å |
|------|--------------|--------------|--------------|
| C    | -5.6477      | -0.5752      | 0.1300       |
| C    | -4.7592      | -0.7669      | -0.9202      |
| C    | -3.9963      | 0.2901       | -1.4180      |
| C    | -4.1391      | 1.5453       | -0.8269      |
| C    | -5.0239      | 1.7419       | 0.2263       |
| C    | -5.7845      | 0.6826       | 0.7067       |
| C    | -3.0176      | 0.0687       | -2.5397      |
| C    | -1.6156      | -0.3047      | -2.0541      |
| O    | -0.9845      | 0.7638       | -1.3555      |
| C    | 4.1749       | -3.7048      | -1.0515      |
| C    | 4.2153       | -2.3548      | -1.3772      |
| C    | 3.9347       | -1.3774      | -0.4222      |
| C    | 3.6132       | -1.7873      | 0.8703       |
| C    | 3.5708       | -3.1358      | 1.2014       |
| C    | 3.8514       | -4.1001      | 0.2415       |
| C    | 3.9273       | 0.0811       | -0.7988      |
| C    | 2.6306       | 0.5072       | -1.4774      |
| O    | 1.5552       | 0.2646       | -0.5861      |
| C    | -2.0898      | -3.7502      | -0.4107      |
| C    | -2.3840      | -2.9458      | 0.6826       |
| C    | -1.3893      | -2.1834      | 1.2975       |
| C    | -0.0947      | -2.2430      | 0.7859       |
| C    | 0.2048       | -3.0400      | -0.3124      |
| C    | -0.7923      | -3.7993      | -0.9120      |
| C    | -1.7143      | -1.2995      | 2.4729       |
| C    | -2.3095      | 0.0563       | 2.0876       |
| O    | -1.4245      | 0.8631       | 1.3181       |
| C    | 0.6609       | 3.7465       | -1.3841      |
| C    | 0.5335       | 3.4400       | -0.0347      |
| C    | 1.6104       | 3.5904       | 0.8364       |
| C    | 2.8222       | 4.0564       | 0.3230       |
| C    | 2.9515       | 4.3753       | -1.0223      |
| C    | 1.8680       | 4.2213       | -1.8813      |
| C    | 1.4881       | 3.2173       | 2.2898       |
| C    | 2.0034       | 1.8092       | 2.6023       |
| O    | 1.2287       | 0.7824       | 2.0034       |
| H    | -6.2355      | -1.4072      | 0.4972       |
| H    | -4.6539      | -1.7498      | -1.3628      |
| H    | -3.5467      | 2.3733       | -1.1948      |
| H    | -5.1178      | 2.7234       | 0.6730       |
| H    | -6.4771      | 0.8351       | 1.5242       |

|   |         |         |         |
|---|---------|---------|---------|
| H | -3.3741 | -0.7387 | -3.1852 |
| H | -2.9412 | 0.9688  | -3.1538 |
| H | -0.9845 | -0.5300 | -2.9161 |
| H | -1.6570 | -1.1968 | -1.4282 |
| H | -1.2910 | 0.7754  | -0.4196 |
| H | 4.3973  | -4.4482 | -1.8065 |
| H | 4.4693  | -2.0547 | -2.3875 |
| H | 3.3738  | -1.0439 | 1.6201  |
| H | 3.3065  | -3.4336 | 2.2079  |
| H | 3.8141  | -5.1510 | 0.4971  |
| H | 4.0724  | 0.6991  | 0.0905  |
| H | 4.7541  | 0.3013  | -1.4788 |
| H | 2.6806  | 1.5668  | -1.7414 |
| H | 2.4877  | -0.0731 | -2.3964 |
| H | 0.6871  | 0.4814  | -0.9993 |
| H | -2.8721 | -4.3411 | -0.8710 |
| H | -3.3967 | -2.9078 | 1.0654  |
| H | 0.6881  | -1.6574 | 1.2456  |
| H | 1.2174  | -3.0633 | -0.6911 |
| H | -0.5621 | -4.4259 | -1.7643 |
| H | -0.8125 | -1.1321 | 3.0668  |
| H | -2.4379 | -1.7984 | 3.1242  |
| H | -3.2045 | -0.0787 | 1.4836  |
| H | -2.5993 | 0.5935  | 2.9980  |
| H | -0.5273 | 0.8604  | 1.7168  |
| H | -0.1828 | 3.5973  | -2.0444 |
| H | -0.4097 | 3.0679  | 0.3437  |
| H | 3.6697  | 4.1817  | 0.9874  |
| H | 3.8963  | 4.7450  | -1.4005 |
| H | 1.9671  | 4.4663  | -2.9311 |
| H | 2.0553  | 3.9231  | 2.9040  |
| H | 0.4444  | 3.2801  | 2.6051  |
| H | 3.0498  | 1.7197  | 2.2896  |
| H | 1.9659  | 1.6411  | 3.6806  |
| H | 1.4697  | 0.6718  | 1.0504  |

---

**Table S15.** Equilibrium coordinates for isomer III (Gt Gg+ Gt Gg-) of 2-phenylethanol tetramer, according to the prediction with B3LYP-D3(BJ) /def2TZVP.

| Atom | $a / \text{Å}$ | $b / \text{Å}$ | $c / \text{Å}$ |
|------|----------------|----------------|----------------|
| C    | -5.3687        | 1.9654         | 0.0332         |
| C    | -4.7299        | 1.3210         | 1.0870         |
| C    | -4.2926        | 0.0038         | 0.9660         |
| C    | -4.5018        | -0.6529        | -0.2477        |
| C    | -5.1331        | -0.0131        | -1.3052        |
| C    | -5.5739        | 1.2992         | -1.1680        |
| C    | -3.6233        | -0.6966        | 2.1233         |
| C    | -2.2440        | -1.2526        | 1.8035         |
| O    | -1.3921        | -0.1846        | 1.4059         |
| C    | 1.7977         | 2.9494         | 1.5612         |
| C    | 0.4776         | 2.6433         | 1.2532         |
| C    | -0.2085        | 3.3509         | 0.2665         |
| C    | 0.4654         | 4.3680         | -0.4112        |
| C    | 1.7835         | 4.6811         | -0.1037        |
| C    | 2.4538         | 3.9736         | 0.8886         |
| C    | -1.6388        | 3.0179         | -0.0663        |
| C    | -1.8055        | 2.1031         | -1.2812        |
| O    | -1.1930        | 0.8308         | -1.1155        |
| C    | -1.7977        | -2.9496        | -1.5611        |
| C    | -0.4777        | -2.6435        | -1.2531        |
| C    | 0.2085         | -3.3511        | -0.2664        |
| C    | -0.4655        | -4.3682        | 0.4113         |
| C    | -1.7836        | -4.6812        | 0.1038         |
| C    | -2.4539        | -3.9736        | -0.8885        |
| C    | 1.6388         | -3.0181        | 0.0662         |
| C    | 1.8056         | -2.1032        | 1.2810         |
| O    | 1.1930         | -0.8309        | 1.1153         |
| C    | 5.3689         | -1.9650        | -0.0328        |
| C    | 4.7301         | -1.3209        | -1.0867        |
| C    | 4.2926         | -0.0037        | -0.9659        |
| C    | 4.5016         | 0.6531         | 0.2477         |
| C    | 5.1330         | 0.0135         | 1.3053         |
| C    | 5.5740         | -1.2987        | 1.1682         |
| C    | 3.6233         | 0.6965         | -2.1234        |
| C    | 2.2440         | 1.2524         | -1.8038        |
| O    | 1.3920         | 0.1845         | -1.4061        |
| H    | -5.7011        | 2.9890         | 0.1508         |
| H    | -4.5687        | 1.8483         | 2.0196         |
| H    | -4.1605        | -1.6725        | -0.3673        |
| H    | -5.2824        | -0.5393        | -2.2396        |



|   |         |         |         |
|---|---------|---------|---------|
| H | -6.0682 | 1.7977  | -1.9918 |
| H | -3.5382 | -0.0043 | 2.9633  |
| H | -4.2489 | -1.5303 | 2.4584  |
| H | -1.8386 | -1.7421 | 2.6952  |
| H | -2.3038 | -2.0036 | 1.0129  |
| H | -0.4603 | -0.5085 | 1.3570  |
| H | 2.3119  | 2.3801  | 2.3246  |
| H | -0.0291 | 1.8480  | 1.7828  |
| H | -0.0530 | 4.9299  | -1.1800 |
| H | 2.2858  | 5.4806  | -0.6336 |
| H | 3.4794  | 4.2196  | 1.1333  |
| H | -2.1156 | 2.5386  | 0.7897  |
| H | -2.1979 | 3.9360  | -0.2692 |
| H | -2.8711 | 1.9735  | -1.4869 |
| H | -1.3416 | 2.5548  | -2.1607 |
| H | -1.4488 | 0.4484  | -0.2454 |
| H | -2.3119 | -2.3803 | -2.3245 |
| H | 0.0291  | -1.8482 | -1.7828 |
| H | 0.0529  | -4.9301 | 1.1800  |
| H | -2.2859 | -5.4807 | 0.6337  |
| H | -3.4795 | -4.2197 | -1.1332 |
| H | 2.1979  | -3.9363 | 0.2692  |
| H | 2.1156  | -2.5390 | -0.7898 |
| H | 2.8712  | -1.9736 | 1.4865  |
| H | 1.3418  | -2.5548 | 2.1607  |
| H | 1.4487  | -0.4485 | 0.2452  |
| H | 5.7015  | -2.9887 | -0.1503 |
| H | 4.5691  | -1.8483 | -2.0193 |
| H | 4.1602  | 1.6727  | 0.3671  |
| H | 5.2821  | 0.5399  | 2.2396  |
| H | 6.0683  | -1.7971 | 1.9921  |
| H | 4.2490  | 1.5302  | -2.4586 |
| H | 3.5383  | 0.0040  | -2.9633 |
| H | 2.3036  | 2.0036  | -1.0134 |
| H | 1.8387  | 1.7418  | -2.6957 |
| H | 0.4603  | 0.5084  | -1.3573 |

---

**Table S16.** Equilibrium coordinates for isomer IV (Gg- Gg- Gg $\pi^+$  Gg $\pi^-$ ) of 2-phenylethanol tetramer, according to the prediction with B3LYP-D3(BJ) /def2TZVP.

| Atom | $a / \text{\AA}$ | $b / \text{\AA}$ | $c / \text{\AA}$ |
|------|------------------|------------------|------------------|
| C    | -4.5785          | -0.4306          | -0.0214          |
| C    | -3.4511          | -0.0631          | -0.7439          |
| C    | -2.9674          | -0.8768          | -1.7686          |
| C    | -3.6436          | -2.0630          | -2.0510          |
| C    | -4.7720          | -2.4347          | -1.3304          |
| C    | -5.2436          | -1.6175          | -0.3098          |
| C    | -1.7195          | -0.5115          | -2.5247          |
| C    | -0.4268          | -0.7848          | -1.7495          |
| O    | -0.2742          | 0.0700           | -0.6282          |
| C    | -1.8167          | -2.8667          | 0.9024           |
| C    | -0.9707          | -2.1688          | 1.7551           |
| C    | 0.3686           | -2.5292          | 1.8904           |
| C    | 0.8476           | -3.6007          | 1.1346           |
| C    | 0.0077           | -4.3016          | 0.2791           |
| C    | -1.3301          | -3.9379          | 0.1647           |
| C    | 1.2927           | -1.7641          | 2.8018           |
| C    | 2.1634           | -0.7495          | 2.0627           |
| O    | 1.4011           | 0.3105           | 1.4975           |
| C    | -3.6204          | 2.9904           | 1.2107           |
| C    | -2.7625          | 3.7252           | 0.4023           |
| C    | -1.3778          | 3.6052           | 0.5313           |
| C    | -0.8736          | 2.7218           | 1.4838           |
| C    | -1.7280          | 1.9739           | 2.2836           |
| C    | -3.1039          | 2.1107           | 2.1556           |
| C    | -0.4513          | 4.3942           | -0.3558          |
| C    | -0.1362          | 3.7121           | -1.6896          |
| O    | 0.5636           | 2.4828           | -1.5477          |
| C    | 3.0493           | -1.7341          | -1.3784          |
| C    | 3.2045           | -0.3555          | -1.4564          |
| C    | 4.3232           | 0.2700           | -0.9072          |
| C    | 5.2803           | -0.5213          | -0.2705          |
| C    | 5.1336           | -1.9009          | -0.1963          |
| C    | 4.0164           | -2.5119          | -0.7536          |
| C    | 4.4876           | 1.7649           | -0.9739          |
| C    | 3.9297           | 2.5063           | 0.2451           |
| O    | 2.5146           | 2.4505           | 0.3328           |
| H    | -4.9351          | 0.2129           | 0.7717           |
| H    | -2.9353          | 0.8541           | -0.4991          |
| H    | -3.2785          | -2.7058          | -2.8437          |
| H    | -5.2826          | -3.3600          | -1.5659          |

|   |         |         |         |
|---|---------|---------|---------|
| H | -6.1225 | -1.9021 | 0.2545  |
| H | -1.6776 | -1.0787 | -3.4585 |
| H | -1.7349 | 0.5475  | -2.7982 |
| H | 0.4212  | -0.6705 | -2.4338 |
| H | -0.4231 | -1.8045 | -1.3669 |
| H | -0.1122 | 0.9830  | -0.9530 |
| H | -2.8486 | -2.5634 | 0.8006  |
| H | -1.3537 | -1.3238 | 2.3129  |
| H | 1.8883  | -3.8893 | 1.2226  |
| H | 0.3955  | -5.1346 | -0.2940 |
| H | -1.9892 | -4.4774 | -0.5029 |
| H | 0.7150  | -1.2382 | 3.5647  |
| H | 1.9594  | -2.4599 | 3.3198  |
| H | 2.8557  | -0.2820 | 2.7653  |
| H | 2.7520  | -1.2495 | 1.2911  |
| H | 0.8083  | -0.0145 | 0.7817  |
| H | -4.6916 | 3.1020  | 1.0998  |
| H | -3.1730 | 4.4092  | -0.3319 |
| H | 0.1950  | 2.6137  | 1.6021  |
| H | -1.3104 | 1.2845  | 3.0055  |
| H | -3.7697 | 1.5333  | 2.7840  |
| H | 0.4894  | 4.5838  | 0.1667  |
| H | -0.8941 | 5.3683  | -0.5827 |
| H | -1.0615 | 3.4787  | -2.2201 |
| H | 0.4444  | 4.3981  | -2.3173 |
| H | 1.3405  | 2.6002  | -0.9556 |
| H | 2.1688  | -2.2021 | -1.7966 |
| H | 2.4497  | 0.2464  | -1.9455 |
| H | 6.1574  | -0.0520 | 0.1602  |
| H | 5.8925  | -2.4981 | 0.2930  |
| H | 3.8973  | -3.5861 | -0.6982 |
| H | 5.5494  | 2.0141  | -1.0575 |
| H | 3.9936  | 2.1562  | -1.8662 |
| H | 4.3771  | 2.1085  | 1.1618  |
| H | 4.1997  | 3.5623  | 0.1758  |
| H | 2.2177  | 1.6229  | 0.7858  |

---
